# Supplementary material
Source: publisher figshare collection journal article supplement (https://tandf.figshare.com/articles/dataset/_/1463311)
Supplement: Supplementary file 1 [file 2]

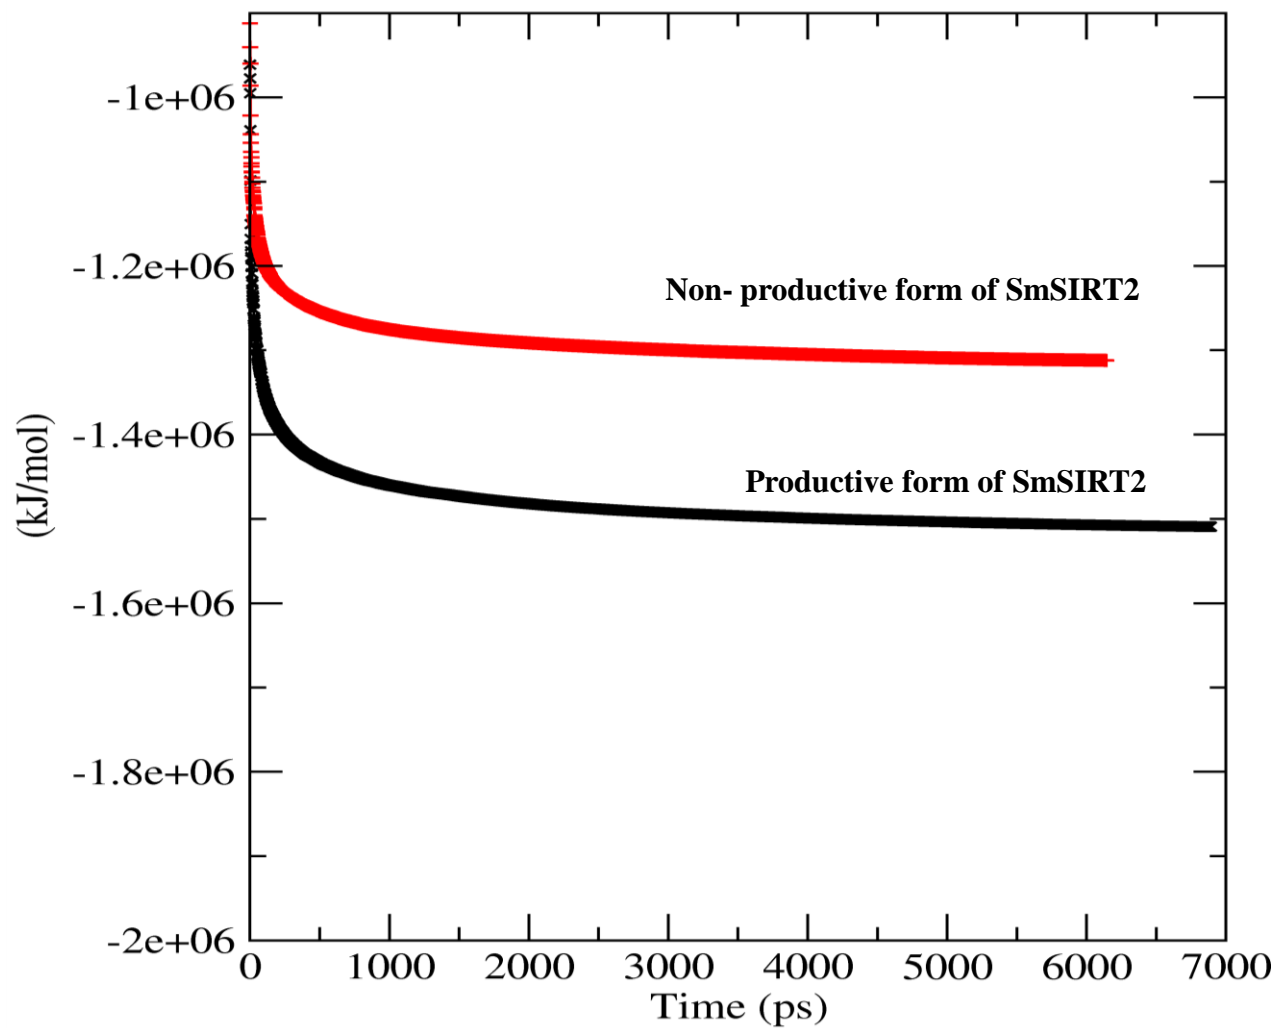

Figure S1: Potential energy of Productive and non productive confirmation of SmSirt2,  $-1.48293 \times 10^{-6}$  KJ/mol and  $-1.2906 \times 10^{-6}$  KJ/mol respectively.

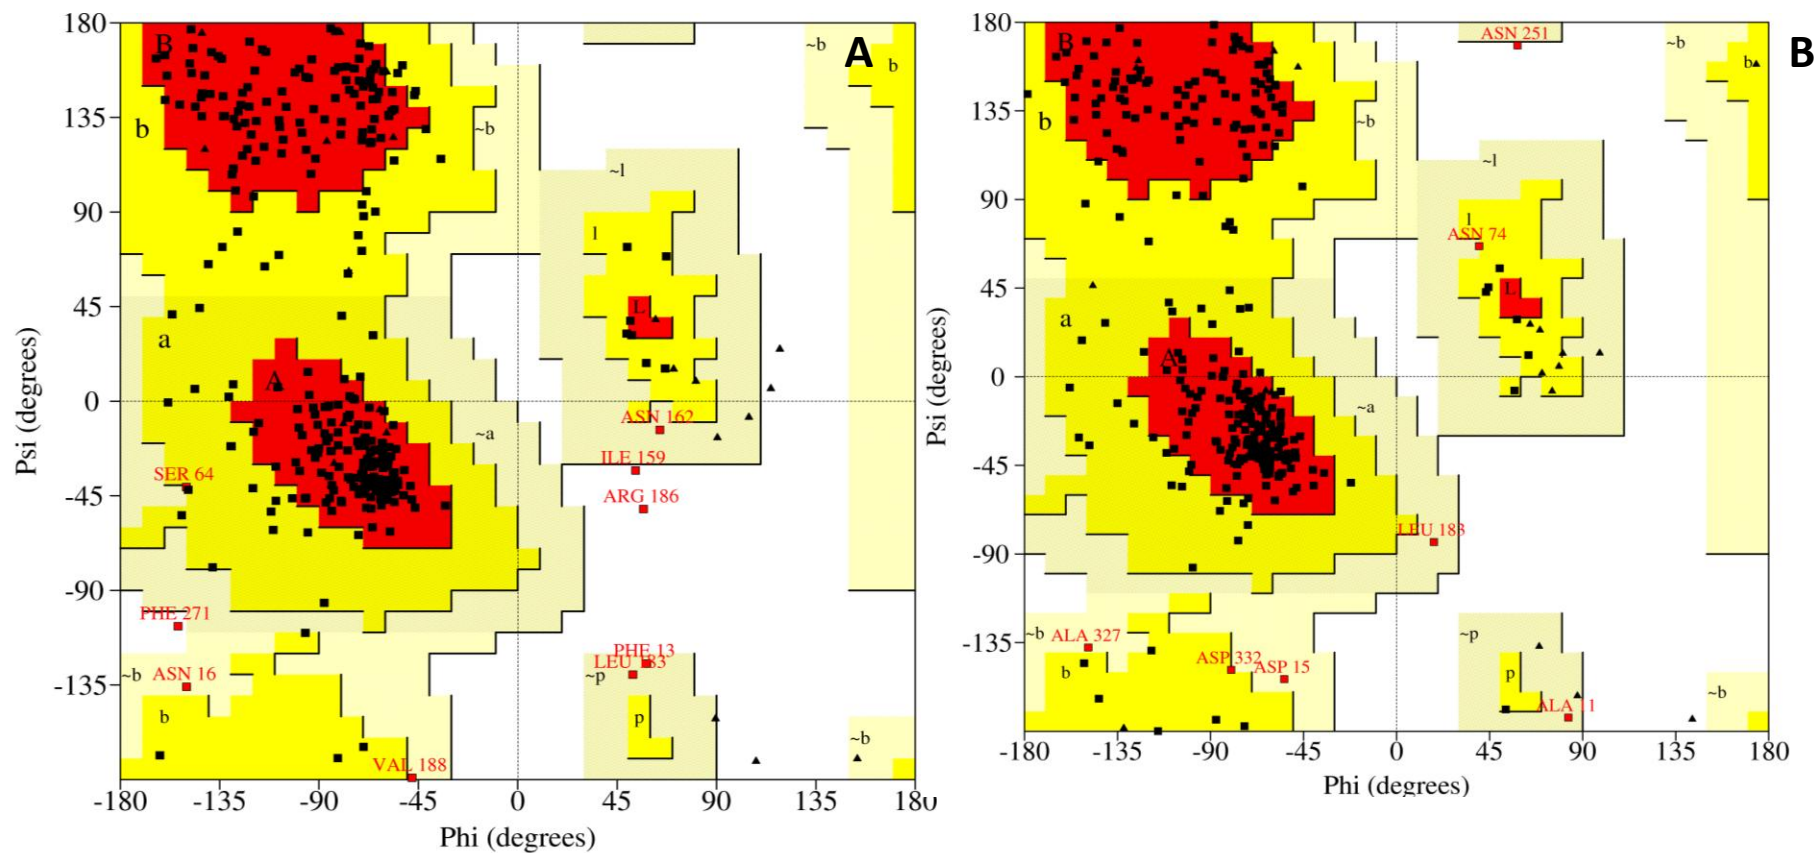

Figure S2: Quality assessment of the Ramachandran plot of productive conformation of SmSirt2 (A ) and non-productive conformation of SmSirt2 (B).

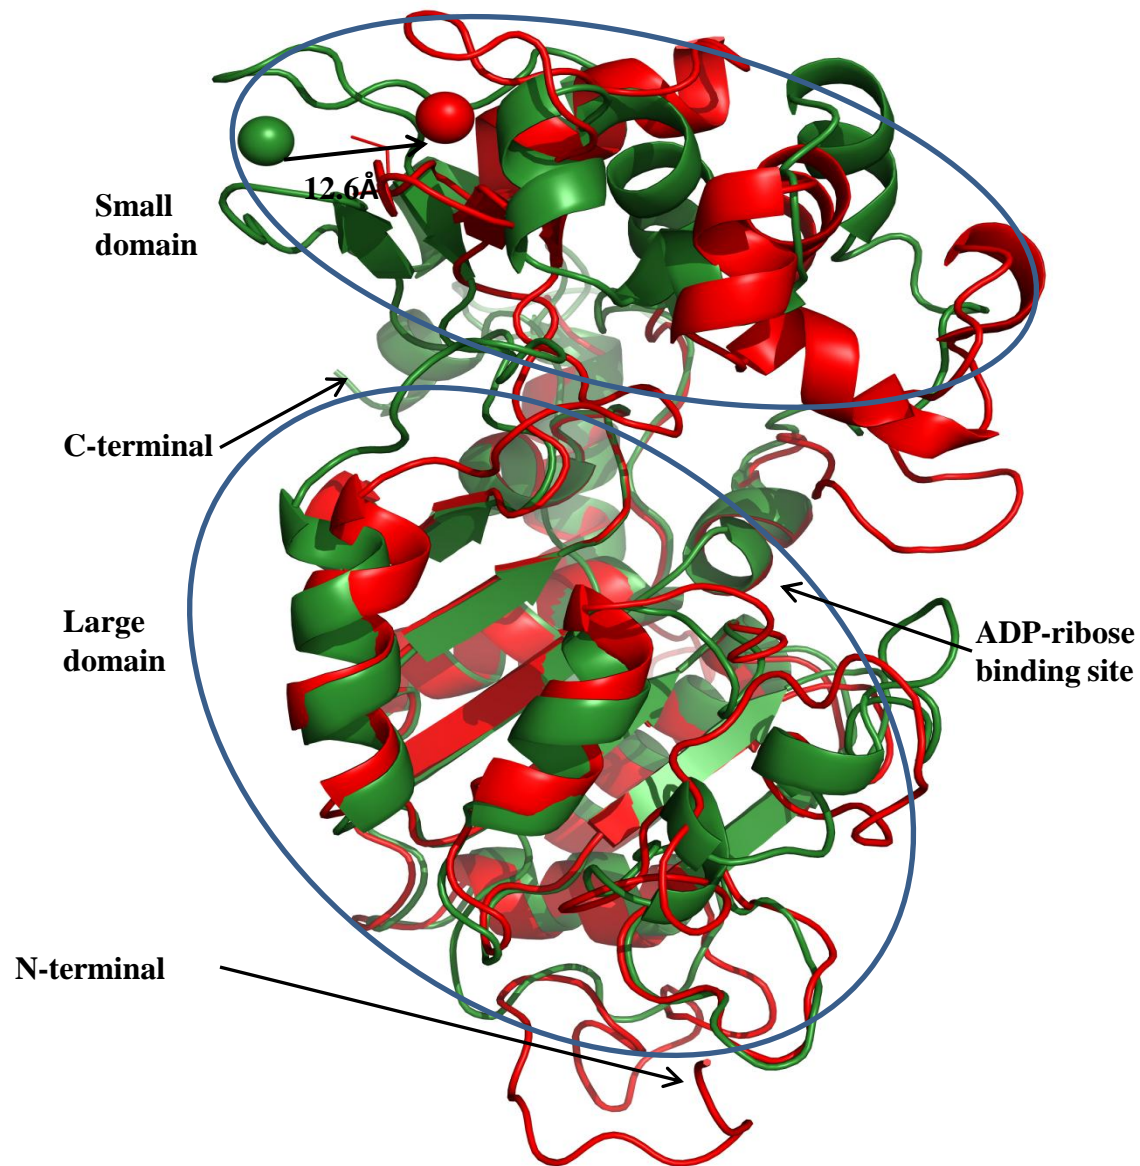

Figure S3:3D structure of SmSirt2 Non-productive (green) and a productive (red) conformation is superimposed. Lower large circle represents a large domain contain Rossmann fold of SmSirt2 proteins and the upper small circle represents small domain which is consist of the Zn ion binding site.

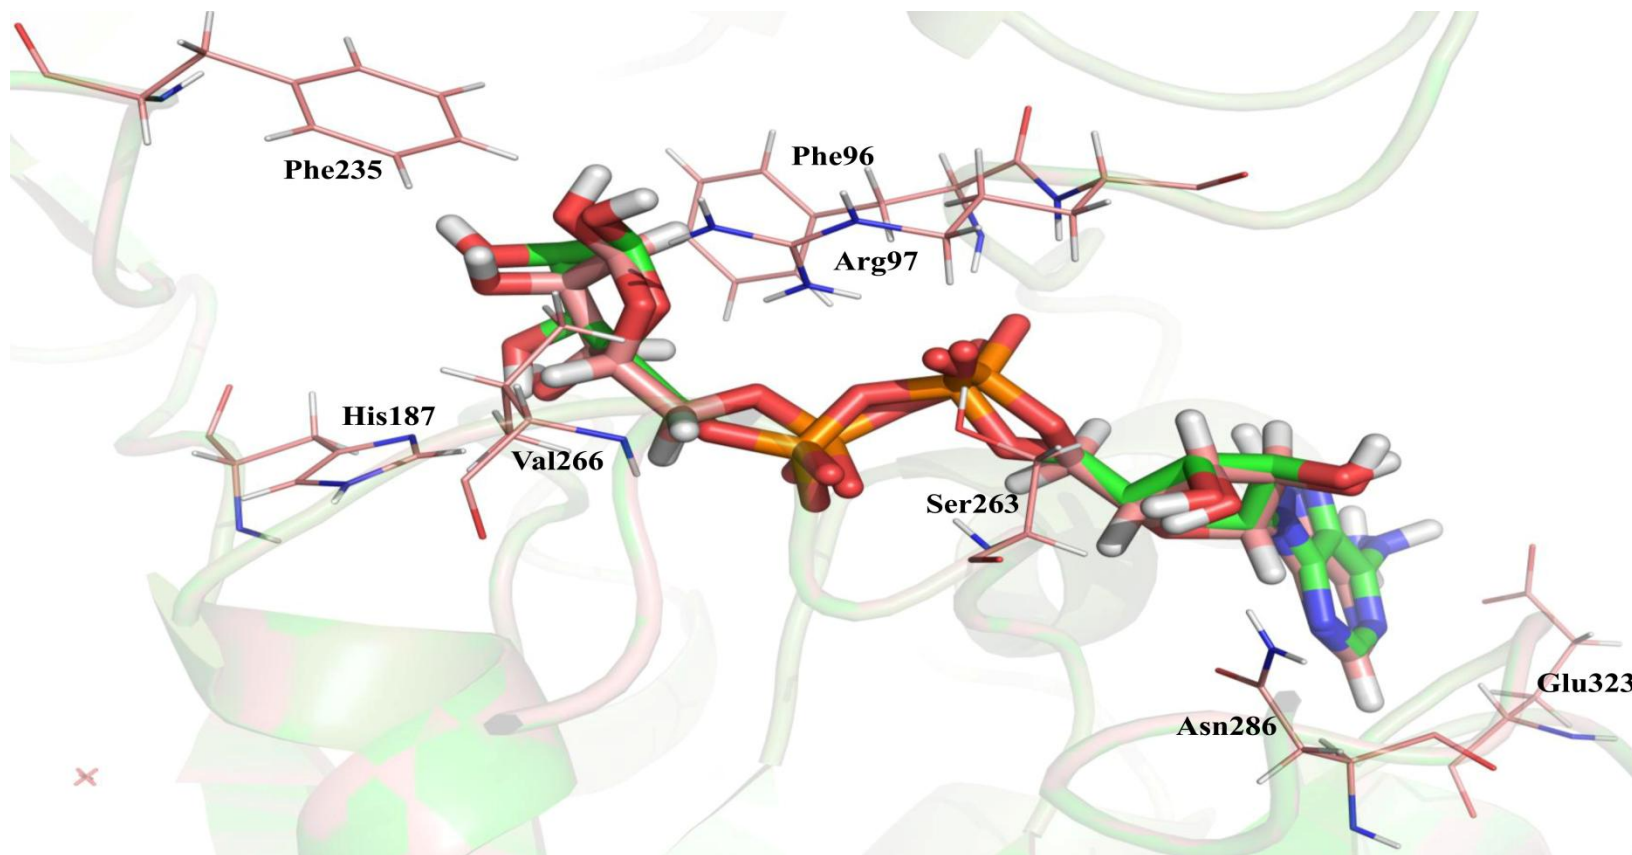

Figure S4: Crystallographic pose of ADP-ribose (in C=brown, N=blue and O=red with stick representation) and re-docked ADP-ribose (C=green, N=blue and O=red stick representation) with hSirt2 (PDB id: 3ZGV).
