# Supplementary material
Source: publisher figshare collection journal article supplement (https://tandf.figshare.com/articles/dataset/_/1463311)
Supplement: Supplementary file 2 [file 2]

Archive with 2 entries (2 files):
- tbsd_a_1065205_sm1250.xlsx
- tbsd_a_1065205_sm1249.pdf
