# Supplementary material
Source: publisher figshare collection journal article supplement (https://tandf.figshare.com/articles/dataset/_/1463311)
Supplement: Supplementary file 2 [file 2 › tbsd_a_1065205_sm1250.xlsx]

## Sheet: Sheet1
ZINC ID	Molecular weight (g/mol)	Partition coefficient xlogP	Apolar desolvation (kcal/mol)	Polar desolvation (kcal/mol)	Hydrogen bond donors	Hydrogen bond acceptors	Polar surface area tPSA (A^2)	Net charge	Rotatable bonds	SMILES
45609769	395.381	2.73	6.61	-15.11	2	6	75	0	5	c1cc(cc(c1)C(F)(F)F)CNC(=O)NC2CCN(CC2)C(=O)c3ccco3
67156580	393.487	2.35	6.01	-12.02	2	6	71	0	6	c1cc(cc(c1)NC(=O)CNC(=O)c2ccc3c(c2)CCC3)CN4CCOCC4
67479345	392.455	2.92	5.81	-13.51	3	6	80	0	5	c1ccc2cc(ccc2c1)[C@@H](CNC(=O)NCc3ccc4c(c3)OCCCO4)O
14047320	411.452	2.99	9.45	-21.24	2	5	65	0	5	c1ccc2c(c1)c(c[nH]2)CCNC(=O)C3CCN(CC3)C(=O)c4ccc(cc4F)F
92615509	399.466	2.57	8.38	-12.33	2	6	71	0	6	Cc1cccc(c1)NC(=O)NCC(=O)N2CCC(CC2)OCc3ccccc3F
51463811	399.878	2.96	7.85	-14.98	2	6	79	0	6	c1cc(cc(c1)NC(=O)CNC(=O)c2cccc(c2)Cl)CN3CCCCC3=O
64321008	391.471	2.29	7.69	-20.69	2	6	72	0	6	Cn1cc(c2c1cccc2)C(=O)NCc3cccc(c3)C(=O)NC[C@@H]4CCCO4
67567381	391.393	2.89	6.72	-16.89	3	5	70	0	6	CNC(=O)c1cccc(c1)CNC(=O)N[C@@H]2C[C@H]2c3cccc(c3)C(F)(F)F
18017669	400.91	2.47	6.14	-10.47	2	6	65	0	6	c1ccc(cc1)CNC(=O)NCC(=O)N2CCN(CC2)Cc3ccc(cc3)Cl
39276868	406.486	2.9	9.97	-18.49	3	5	62	0	5	c1ccn(c1)[C@H]2Nc3ccc(cc3S2)C(=O)NCCc4c[nH]c5c4cc(cc5)F
67663318	398.406	2.86	5.85	-22.1	2	5	75	0	5	CS(=O)(=O)c1cccc(c1)NC(=O)N[C@@H]2C[C@H]2c3cccc(c3)C(F)(F)F
91672903	397.431	2.93	6.92	-21.67	2	6	80	0	5	c1ccc(c(c1)C(=O)Nc2nc(cs2)CC(=O)Nc3ccc4c(c3)COC4)F
44036876	418.493	2.54	8.87	-23.98	2	6	79	0	6	c1ccc2cc(ccc2c1)OCC(=O)Nc3ccc(cc3)CC(=O)N4CCC(CC4)O
66693196	395.434	2.47	7.38	-28.54	2	6	74	0	5	c1ccc2c(c1)c(c[nH]2)C(=O)NCCC(=O)N3CCO[C@@H](C3)c4cccc(c4)F
68214988	391.471	2.29	7.72	-20.92	2	6	72	0	6	Cn1cc(c2c1cccc2)C(=O)NCc3cccc(c3)C(=O)NC[C@H]4CCCO4
66689717	395.434	2.45	7.39	-29.98	2	6	74	0	5	c1ccc2c(c1)c(c[nH]2)C(=O)NCCC(=O)N3CCO[C@@H](C3)c4ccccc4F
58769890	390.487	2.9	9.01	-18.54	2	6	78	0	6	CN1CCCc2c1ccc(c2)CNC(=O)CCCc3[nH]c(=O)c4ccccc4n3
12628867	390.487	2.59	8.49	-25.35	2	6	78	0	5	Cc1ccccc1C(=O)N2CCC(CC2)C(=O)NCCc3[nH]c4ccccc4n3
13692182	390.34	2.72	7.31	-15.52	3	5	74	0	5	c1cc2c(cc1C(=O)NCCc3c[nH]c4c3cc(cc4)F)[nH]c(n2)C(F)(F)F
67931418	393.487	2.54	6.53	-16.82	3	6	79	0	6	c1ccc2c(c1)CC[C@H]2NC(=O)NCc3cccc(c3)C(=O)NC[C@@H]4CCCO4
67933261	390.842	2.84	6.66	-15.27	2	5	67	0	6	c1cc(cc(c1)C(=O)NC[C@H]2CCCO2)CNC(=O)c3cc(ccc3F)Cl
90744326	394.471	2.17	6.22	-16.93	2	6	79	0	5	Cc1ccc(cc1C)N2C[C@@H](CC2=O)C(=O)NC[C@H](c3ccc4c(c3)CCO4)O
67568050	391.393	2.91	7.36	-16	3	5	70	0	6	CC(=O)Nc1cccc(c1)CNC(=O)N[C@@H]2C[C@H]2c3cccc(c3)C(F)(F)F
52564104	390.484	2.67	5.34	-17.42	2	6	65	0	6	c1ccc(c(c1)C(=O)NCCNC(=O)N2CCN(CC2)Cc3cccs3)F
68864841	390.487	2.86	6.32	-13.84	2	6	66	0	6	c1cc2cccnc2c(c1)CNC(=O)Nc3ccc(cc3)CCN4CCOCC4
77970347	395.484	1.45	7.44	-16.42	2	6	79	0	5	c1ccc2c(c1)CCN2C(=O)CCCNC(=O)c3ccc4c(c3)SCC(=O)N4
20617775	392.312	2.83	6.94	-22.18	2	6	76	0	5	c1cc(c(cc1F)NC(=O)Cn2ccc(n2)C(=O)Nc3cc(ccc3F)F)F
63317223	390.842	2.84	6.64	-15.67	2	5	67	0	6	c1cc(cc(c1)C(=O)NC[C@@H]2CCCO2)CNC(=O)c3cc(ccc3F)Cl
67932043	393.487	2.96	8.5	-17.58	2	6	71	0	5	C[C@@H]1Cc2ccccc2N1C(=O)NCc3cccc(c3)C(=O)NC[C@H]4CCCO4
67932038	393.487	2.96	8.48	-17.37	2	6	71	0	5	C[C@@H]1Cc2ccccc2N1C(=O)NCc3cccc(c3)C(=O)NC[C@@H]4CCCO4
67479349	392.455	2.92	5.89	-13.39	3	6	80	0	5	c1ccc2cc(ccc2c1)[C@H](CNC(=O)NCc3ccc4c(c3)OCCCO4)O
90744344	400.862	2.02	5.51	-16	2	6	79	0	5	c1cc(ccc1N2C[C@@H](CC2=O)C(=O)NC[C@H](c3ccc4c(c3)CCO4)O)Cl
34899889	397.45	1.72	7.01	-25.24	2	6	79	0	6	c1ccc(cc1)C(=O)NCCNC(=O)C2CCN(CC2)C(=O)c3ccccc3F
60455822	390.487	2.64	7.38	-25.29	3	6	77	0	6	CN1CCCc2c1ccc(c2)CNC(=O)CCNC(=O)c3c[nH]c4c3cccc4
92541705	395.503	2.86	8.91	-12.75	2	6	71	0	6	Cc1cccc(c1)NC(=O)NCC(=O)N2CCC(CC2)OCc3ccccc3C
53506301	390.487	2.25	7.16	-11.97	2	6	68	0	5	C[C@@H](CNC(=O)c1cc(=O)c2ccccc2[nH]1)N3CCN(CC3)c4ccccc4
67606545	393.487	2.14	7.67	-16.77	3	6	79	0	5	c1ccc2c(c1)CCC[C@H]2NC(=O)NCc3cccc(c3)NC(=O)[C@@H]4CCCO4
77969905	411.527	2.99	8.19	-9.24	2	6	80	0	6	c1cc(ccc1CNC(=O)c2ccc3c(n2)NC(=O)CS3)COC4CCCCC4
65595858	392.484	2.57	7.91	-20.92	2	6	76	0	5	c1ccc(cc1)n2ccc(n2)CCNC(=O)c3ccc4c(c3)NC(=O)CCS4
68783700	394.443	2.94	5.57	-15.79	2	5	75	0	6	c1ccc2c(c1)CC[C@H](C2)NC(=O)CCNS(=O)(=O)c3ccc(c(c3)F)F
68841203	398.466	2.48	9.24	-22.55	2	6	76	0	6	c1ccn(c(=O)c1)Cc2ccc(cc2)CNC(=O)NCc3cccc4c3nccc4
69298653	394.45	2.71	6.42	-13.35	2	6	70	0	5	c1cc(ccc1[C@@H]2C[C@H]2C(=O)Nc3ccc4c(c3)nc([nH]4)CN5CCOCC5)F
35316921	404.367	2.79	9.04	-19.62	2	5	63	0	5	Cn1cc(c2c1ccc(c2)F)CCNC(=O)c3ccc4c(c3)nc([nH]4)C(F)(F)F
67564994	396.871	2.76	5.8	-20.74	2	5	75	0	6	c1cc(cc(c1)F)[C@H]2C[C@@H]2NC(=O)NCCS(=O)(=O)c3ccc(cc3)Cl
67152271	398.434	2.84	6.98	-13.94	2	6	77	0	6	c1cc2c(cc1C(=O)NCC(=O)NCCc3cc(cc4c3OCOC4)F)CCC2
68414316	391.349	2.93	6.3	-20.59	2	6	76	0	5	c1cc2c(cc1C(=O)NCCc3cc(cc4c3OCOC4)F)nc([nH]2)C(F)F
53484031	394.45	2.09	6.48	-13.65	2	6	68	0	5	c1ccc2c(c1)c(=O)cc([nH]2)C(=O)NCCN3CCN(CC3)c4ccc(cc4)F
56322636	392.434	2.93	9.47	-11.48	2	6	76	0	6	C[C@H]1C[C@@H]1C(=O)Nc2ccc(cc2C(=O)NCc3cnn(c3)c4ccccc4)F
35562010	410.905	2.98	8.32	-15.65	2	6	78	0	5	c1cc(cnc1)CNC(=O)CC2CCN(CC2)C(=O)c3cc4cc(ccc4[nH]3)Cl
48171073	390.487	2.92	8.61	-26.91	2	6	68	0	5	Cc1cccc(c1)N2CCN(CC2)C(=O)CCNC(=O)c3c[nH]c4c3cccc4
35392770	396.516	2.73	6.09	-19.21	2	6	68	0	6	c1ccc2c(c1)c(c[nH]2)CCNC(=O)CN3CCN(CC3)C(=O)c4cccs4
53158864	408.477	2.68	7.51	-19.3	2	6	68	0	6	c1ccc2c(c1)c(c[nH]2)CC(=O)N3CCN(CC3)CC(=O)NCc4ccc(cc4)F
69288060	393.487	2.85	8	-16.87	3	6	79	0	5	C[C@H]1C[C@H](c2c1cccc2)NC(=O)NCc3cccc(c3)NC(=O)[C@@H]4CCCO4
15062992	390.487	1.87	8.03	-18.77	2	6	78	0	6	c1cc(cnc1)CNC(=O)CCC2CCN(CC2)C(=O)c3ccc4cc[nH]c4c3
67156491	393.487	2.5	7	-11.34	2	6	71	0	6	c1cc(ccc1CNC(=O)CNC(=O)c2ccc3c(c2)CCC3)N4CCOCC4
57381999	390.439	2.9	7.08	-14.56	2	6	77	0	6	c1ccc2c(c1)cccc2CC(=O)NCC(=O)NCc3ccc4c(c3)OCCO4
92615970	391.487	2.36	7.55	-11.05	2	6	71	0	6	c1ccc(c(c1)COC2CCN(CC2)C(=O)CNC(=O)NC3CCCCC3)F
19298312	399.447	2.93	7.55	-13.83	2	6	76	0	6	c1ccc2c(c1)OC[C@@H](O2)CNC(=O)CSc3[nH]c(cn3)c4ccc(cc4)F
68647574	394.471	2.94	7.63	-14.07	2	6	77	0	6	c1ccc2c(c1)OC[C@@H](O2)CNC(=O)c3ccc(cc3)CNC(=O)C4CCCC4
48367013	390.487	2.71	7.8	-22.34	2	6	78	0	6	c1ccc(cc1)CCC(=O)NC2CCN(CC2)Cc3[nH]c4ccccc4c(=O)n3
68264519	394.519	2.94	6.9	-12.79	2	6	68	0	5	Cc1cccc(c1)N2CCN(CC2)CCNC(=O)c3cc4c([nH]c3=O)CCCC4
68885920	390.487	2.37	5.68	-12.56	2	6	66	0	6	c1ccc(cc1)CN2CCO[C@@H](C2)CNC(=O)NCc3cccc4c3nccc4
65466567	392.908	2.74	6.21	-17.22	2	5	75	0	6	c1cc(ccc1S(=O)(=O)CCNC(=O)NCc2ccc3c(c2)CCC3)Cl
63316256	398.528	2.84	7.61	-15.38	2	5	67	0	6	c1cc(cc(c1)C(=O)NC[C@@H]2CCCO2)CNC(=O)c3csc4c3CCCC4
58146510	394.443	2.94	5.58	-15.73	2	5	75	0	6	c1ccc2c(c1)CC[C@@H](C2)NC(=O)CCNS(=O)(=O)c3ccc(c(c3)F)F
61962961	394.83	2.84	4.22	-15.93	3	6	80	0	6	c1cc(ccc1[C@H](CNC(=O)NCCc2cc3c(c(c2)Cl)OCCO3)O)F
14983698	407.901	2.8	8.26	-16.34	2	5	65	0	5	c1ccc2c(c1)CCN(C2)Cc3ccc(c(=O)[nH]3)C(=O)NCc4ccccc4Cl
70840945	391.418	2.61	6.48	-14.03	2	6	75	0	6	Cc1cc(c(o1)C)C(=O)NCC(=O)NC[C@@H]2CCN(C2)c3ccc(c(c3)F)F
13688314	390.487	2.5	6.92	-22.15	2	6	68	0	6	c1ccc(cc1)CN2CCN(CC2)C(=O)CCNC(=O)c3cc4ccccc4[nH]3
65199866	397.422	2.9	5.95	-13.27	2	5	71	0	6	c1cc(cc(c1)C(F)(F)F)CNC(=O)c2csc(n2)C(=O)NC3CCCC3
40144305	406.841	2.95	6.35	-14.22	2	6	77	0	6	c1cc(cc(c1)F)CC(=O)NCC(=O)NCc2cc3c(c(c2)Cl)OCCCO3
68609759	391.468	2.83	5.23	-16.46	2	6	79	0	6	CN1CCCc2c1ccc(c2)NC(=O)CCNS(=O)(=O)c3ccc(cc3)F
67606547	393.487	2.14	7.65	-17.59	3	6	79	0	5	c1ccc2c(c1)CCC[C@H]2NC(=O)NCc3cccc(c3)NC(=O)[C@H]4CCCO4
67567720	393.413	2.54	8.7	-14.74	2	6	72	0	5	c1cc(cc(c1)C(F)(F)F)[C@@H]2C[C@H]2NC(=O)NCc3nnc4n3CCCCC4
56322640	392.434	2.93	9.53	-10.99	2	6	76	0	6	C[C@H]1C[C@H]1C(=O)Nc2ccc(cc2C(=O)NCc3cnn(c3)c4ccccc4)F
14995165	390.468	2.46	7.71	-24.5	2	6	76	0	6	c1ccc2c(c1)cccc2CNC(=O)Cn3cc(cn3)NC(=O)c4ccsc4
32802772	395.381	2.75	6.59	-15.42	2	6	75	0	5	c1cc(oc1)C(=O)N2CCC(CC2)NC(=O)NCc3ccc(cc3)C(F)(F)F
67567713	393.413	2.54	8.7	-15.65	2	6	72	0	5	c1cc(cc(c1)C(F)(F)F)[C@H]2C[C@@H]2NC(=O)NCc3nnc4n3CCCCC4
20745365	401.466	2.51	8.35	-25.17	2	6	79	0	6	c1ccc(cc1)N2C[C@@H](CC2=O)C(=O)NCCNC(=O)c3ccc4ccccc4c3
49249016	391.471	2.65	8.34	-20.32	2	6	74	0	6	c1ccc2c(c1)c(c[nH]2)CCCC(=O)Nc3cccc(c3)C(=O)N4CCOCC4
32901131	399.878	2.14	6.71	-18.32	2	6	79	0	6	c1ccc(c(c1)C(=O)NCC(=O)NCc2ccc(cc2)C(=O)N3CCCC3)Cl
72009167	390.487	1.78	7.45	-14.61	2	6	68	0	5	C[C@@H](CNC(=O)c1c[nH]c2ccccc2c1=O)N3CCN(CC3)c4ccccc4
61748985	397.5	2.9	7.09	-21.09	2	6	79	0	5	C#Cc1cccc(c1)NC(=O)NCC2CCN(CC2)S(=O)(=O)c3ccccc3
48322776	394.45	2.28	9.13	-19.77	2	6	78	0	5	c1ccc(cc1)CCC(=O)NC2CCN(CC2)C(=O)c3cc(cc4c3nc[nH]4)F
68278071	394.519	2.85	6.95	-12.14	2	6	68	0	5	C[C@@H](CNC(=O)c1cc2c([nH]c1=O)CCCC2)N3CCN(CC3)c4ccccc4
62289862	392.377	2.93	7.84	-17.54	2	5	67	0	6	c1cc(cc(c1)NC(=O)[C@H]2CCCO2)CNC(=O)c3cccc(c3)C(F)(F)F
58616854	392.503	2.8	8.48	-18.28	2	6	65	0	4	CN1CCCc2c1ccc(c2)CNC(=O)Nc3ccc(cc3)C(=O)N4CCCC4
58619685	392.503	2.94	9.24	-14.96	2	6	65	0	5	CN1CCCc2c1ccc(c2)CNC(=O)Nc3cccc(c3)CN4CCCC4=O
69299152	394.45	2.68	6.42	-12.6	2	6	70	0	5	c1cc(cc(c1)F)[C@@H]2C[C@H]2C(=O)Nc3ccc4c(c3)nc([nH]4)CN5CCOCC5
46498664	396.365	2.5	3.77	-16.9	3	6	80	0	6	c1cc(c(cc1[C@H](CNC(=O)NCCc2cc(cc3c2OCOC3)F)O)F)F
13944949	413.88	2.42	9.53	-13.9	2	5	65	0	6	c1ccc(c(c1)CNC(=O)[C@@H]2CC(=O)N(C2)CCc3c[nH]c4c3cc(cc4)F)Cl
66158560	398.532	2.76	8.32	-17.57	2	6	74	0	6	c1cc(cc(c1)N2CCCC2=O)NC(=O)NCCCc3nc4c(s3)CCCC4
57153350	398.413	2.33	7.59	-14.63	2	6	78	0	4	c1ccc2c(c1)[nH]c(n2)[C@H]3CCCN(C3)C(=O)CNC(=O)c4cc(cc(c4)F)F
4874371	403.36	2.61	0.68	-19.33	2	6	80	0	6	c1ccc2c(c1)ccn(c2=O)CC(=O)NCC(=O)Nc3cccc(c3)C(F)(F)F
66439227	399.878	2.63	7.85	-20.16	2	6	79	0	6	Cc1ccc(c(c1)Cl)NC(=O)CCNC(=O)[C@@H]2CC(=O)N(C2)c3ccccc3
68276153	398.482	2.68	6.3	-13.32	2	6	68	0	5	c1cc(ccc1N2CCN(CC2)CCNC(=O)c3cc4c([nH]c3=O)CCCC4)F
62289536	394.805	2.92	7.46	-15.15	2	5	67	0	5	c1cc(cc(c1)NC(=O)[C@H]2CCCO2)CNC(=O)c3cc(c(cc3Cl)F)F
60552978	394.378	2.97	6.72	-14.22	2	6	76	0	5	CSc1nc(c2n1cccc2)C(=O)NCC(=O)Nc3ccc(c(c3F)F)F
67932690	398.528	2.84	7.63	-15.1	2	5	67	0	6	c1cc(cc(c1)C(=O)NC[C@H]2CCCO2)CNC(=O)c3csc4c3CCCC4
34899864	413.905	2.23	7.42	-22.9	2	6	79	0	6	c1ccc(cc1)C(=O)NCCNC(=O)C2CCN(CC2)C(=O)c3ccccc3Cl
70776962	399.878	2.57	7.88	-13.84	2	6	79	0	6	Cc1ccc(cc1N2C[C@@H](CC2=O)C(=O)NCC(=O)NCc3ccccc3)Cl
65429799	390.358	2.93	4.72	-18.77	2	5	75	0	6	c1ccc(cc1)S(=O)(=O)CCNC(=O)Nc2ccc(c(c2)C(F)(F)F)F
70052202	390.358	2.91	4.66	-16.23	2	5	75	0	6	c1cc(cc(c1)S(=O)(=O)C(F)F)NC(=O)NCCc2ccc(cc2F)F
62084963	399.516	2.66	6.87	-17.83	2	6	79	0	6	c1ccc2c(c1)CCN2S(=O)(=O)CCNC(=O)NCc3ccc4c(c3)CCC4
66136798	398.532	2.77	7.6	-12.75	2	6	74	0	6	c1ccc2c(c1)CCN2C(=O)CNC(=O)NCCCc3nc4c(s3)CCCC4
69298662	394.45	2.66	6.38	-15.91	2	6	70	0	5	c1ccc(c(c1)[C@@H]2C[C@H]2C(=O)Nc3ccc4c(c3)nc([nH]4)CN5CCOCC5)F
67933082	390.842	2.84	6.63	-14.52	2	5	67	0	6	c1cc(cc(c1)C(=O)NC[C@H]2CCCO2)CNC(=O)c3ccc(cc3Cl)F
44004028	401.532	2.85	6.73	-17.34	2	6	79	0	6	c1ccc2c(c1)cccc2CNC(=O)NCC3CCN(CC3)S(=O)(=O)C4CC4
67568047	391.393	2.91	7.36	-16.53	3	5	70	0	6	CC(=O)Nc1cccc(c1)CNC(=O)N[C@H]2C[C@@H]2c3cccc(c3)C(F)(F)F
90744324	394.471	2.17	6.32	-16.76	2	6	79	0	5	Cc1ccc(cc1C)N2C[C@@H](CC2=O)C(=O)NC[C@@H](c3ccc4c(c3)CCO4)O
32458792	391.471	1.74	7.89	-25.19	2	6	79	0	6	c1ccc(cc1)C(=O)NCCNC(=O)[C@@H]2CC(=O)N(C2)c3ccc4c(c3)CCC4
66549268	390.386	1.94	5.84	-23.96	2	6	77	0	6	c1cc2c(cc1CNC(=O)CCNC(=O)c3ccc(cc3F)F)OCCCO2
25985582	405.248	2.67	4.97	-12.4	2	6	77	0	5	c1ccc2c(c1)OC[C@H](O2)CNC(=O)CNC(=O)c3cccc(c3)Br
67931423	393.487	2.54	6.55	-16.85	3	6	79	0	6	c1ccc2c(c1)CC[C@H]2NC(=O)NCc3cccc(c3)C(=O)NC[C@H]4CCCO4
94031404	398.528	2.93	7.42	-17.62	2	5	75	0	6	c1ccc(cc1)S(=O)(=O)CCCNC(=O)N[C@@H]2C[C@@H]3CCCc4c3c2ccc4
70812653	416.506	2.38	8.33	-24.64	2	6	78	0	4	Cc1nc(cs1)c2cccc(c2)NC(=O)C3CN(C3)C(=O)c4c[nH]c5c4cccc5
13944930	413.88	2.47	9.62	-18.14	2	5	65	0	6	c1cc(ccc1CNC(=O)[C@H]2CC(=O)N(C2)CCc3c[nH]c4c3cc(cc4)F)Cl
70925534	402.498	2.97	9.14	-15.95	2	6	74	0	5	c1ccc2c(c1)cccc2CNC(=O)NCC3CCN(CC3)C(=O)c4ccccn4
63733842	396.34	1.83	5.41	-17.45	2	5	70	0	5	c1cc(c(cc1[C@@H](CNC(=O)[C@@H]2CC(=O)N(C2)c3cc(cc(c3)F)F)O)F)F
77909091	390.468	1.71	7.53	-16.05	2	6	76	0	6	c1ccnc(c1)CNC(=O)c2ccc(cc2)CNC(=O)c3cc4n(c3)ccs4
64437678	392.814	2.79	6.03	-24.25	2	6	77	0	4	CNC(=O)c1cc(ccc1F)NC(=O)Cc2cc3c(c(c2)Cl)OCCCO3
46313835	397.45	2.96	8.36	-23.19	2	6	79	0	6	c1ccc(c(c1)CNC(=O)c2ccc(cc2)NC(=O)CN3CCCCCC3=O)F
67450363	399.248	2.79	4.27	-17.16	2	6	80	0	5	c1cc(cc(c1)Br)Cc2nc(on2)CNc3ccc4c(c3)C(=O)NC4
44013734	390.487	3	9.65	-21.13	2	6	66	0	6	c1ccc2c(c1)ccn2CCCNC(=O)Nc3ccc(cc3)C(=O)N4CCCC4
70766226	399.878	2.38	7.83	-18.29	2	6	79	0	6	Cc1ccc(cc1N2C[C@@H](CC2=O)C(=O)NCCNC(=O)c3ccccc3)Cl
67567378	391.393	2.89	6.72	-17.69	3	5	70	0	6	CNC(=O)c1cccc(c1)CNC(=O)N[C@H]2C[C@@H]2c3cccc(c3)C(F)(F)F
67808180	394.805	2.92	7.46	-15.03	2	5	67	0	5	c1cc(cc(c1)NC(=O)[C@@H]2CCCO2)CNC(=O)c3cc(c(cc3Cl)F)F
23423319	393.487	2.73	8.42	-23.69	2	6	79	0	6	Cc1ccccc1C(=O)NCCC(=O)N2CCC[C@@H](C2)C(=O)Nc3ccccc3
44140991	390.487	2.98	9.67	-24.48	2	6	66	0	6	c1ccc2c(c1)ccn2CCCNC(=O)Nc3cccc(c3)C(=O)N4CCCC4
69258726	393.418	2.86	7.1	-14.04	2	6	72	0	5	c1ccnc(c1)COc2cccc(c2)NC(=O)N[C@@H]3CCOc4c3cc(cc4)F
13944948	413.88	2.42	9.55	-18.14	2	5	65	0	6	c1ccc(c(c1)CNC(=O)[C@H]2CC(=O)N(C2)CCc3c[nH]c4c3cc(cc4)F)Cl
22491067	390.487	2.98	9.87	-22.03	2	6	78	0	6	Cc1cccc(c1C)N2C[C@@H](CC2=O)C(=O)NCCCc3[nH]c4ccccc4n3
56669964	395.814	2.89	4.5	-12	2	6	77	0	6	c1cc(cc(c1)F)OC[C@H](CNC(=O)c2cc3c(c(c2)Cl)OCCCO3)O
90744342	400.862	2.02	5.61	-15.86	2	6	79	0	5	c1cc(ccc1N2C[C@@H](CC2=O)C(=O)NC[C@@H](c3ccc4c(c3)CCO4)O)Cl
69791857	399.516	2.01	5.06	-20.74	2	6	76	0	6	c1cc2c(cc1OCCN3CCN(CC3)C(=O)c4cc(cs4)C(=O)N)CCC2
32906525	391.471	2.19	8.06	-17.91	2	6	79	0	5	c1ccc2c(c1)C[C@@H](C(=O)N2)CCC(=O)Nc3ccc(cc3)C(=O)N4CCCC4
18215949	415.799	3	6.46	-12.88	2	6	72	0	6	c1cc2c(cc1C(=O)NCCNc3c(cc(cn3)C(F)(F)F)Cl)OCCCO2
66343846	396.466	3	6.8	-18.12	3	6	73	0	6	c1ccc2c(c1)[C@H](C(=O)N2)CCNC(=O)NC[C@H]3CCN(C3)c4ccc(cc4)F
52820294	403.269	2.91	7.25	-16.09	2	6	76	0	6	c1ccc(c(c1)C(=O)NCCNC(=O)c2cnn(c2)c3ccc(cc3)Cl)Cl
58621982	394.519	2.95	9.58	-19.32	2	6	65	0	6	CCN(Cc1cccc(c1)NC(=O)NCc2ccc3c(c2)CCCN3C)C(=O)C
61340014	393.468	2.65	7.03	-21.49	2	6	80	0	6	c1ccc(cc1)C(=O)NCCC(=O)Nc2nc(cs2)c3ccc4c(c3)COC4
55862270	407.392	2.65	5.97	-17.39	2	6	71	0	6	c1cc(cc(c1)NC(=O)CNc2ccc(cc2)C(=O)N3CCOCC3)C(F)(F)F
77117291	406.457	2.91	8.2	-16.36	2	5	70	0	6	c1ccc2c(c1)cccc2[C@@H](CCNC(=O)[C@@H]3CC(=O)N(C3)c4ccc(cc4)F)O
58660803	392.228	2.91	4.82	-17.37	3	5	70	0	4	c1cc(c(cc1CCNC(=O)Nc2ccc3c(c2)C(=O)NC3)Br)F
72033281	390.487	2.79	6.28	-11.32	2	6	66	0	5	C[C@@H]1CN(CCO1)Cc2cccc(c2)CNC(=O)Nc3cccc4c3nccc4
47293598	412.44	1.88	7.4	-12.87	2	6	70	0	5	c1cc(ccc1n2ccc(n2)C(=O)NCc3ccc(c(c3)F)N4CCC(CC4)O)F
13728734	419.525	2.99	9.08	-23.84	2	6	74	0	6	Cc1c(c2ccccc2[nH]1)CCNC(=O)C3CCN(CC3)C(=O)c4cccc(c4)OC
94031406	398.528	2.93	7.46	-17.71	2	5	75	0	6	c1ccc(cc1)S(=O)(=O)CCCNC(=O)N[C@@H]2C[C@H]3CCCc4c3c2ccc4
65805341	399.535	2.94	8.24	-19.16	2	6	79	0	6	Cc1ccccc1C(=O)NCCC(=O)N2CCC[C@@H](C2)C(=O)NC3CCCCC3
69924349	390.553	2.43	6.99	-13.45	2	6	74	0	5	c1c(nc(s1)C2CC2)CNC(=O)NC3CCN(CC3)C(=O)C4CCCCC4
50360088	397.45	2.66	7.88	-18.93	2	6	79	0	6	c1ccc(cc1)CC(=O)N2CCC[C@@H](C2)C(=O)NCC(=O)Nc3cccc(c3)F
13944711	396.878	2.11	7.7	-18.08	2	6	78	0	6	c1ccnc(c1)CNC(=O)[C@@H]2CC(=O)N(C2)CCc3c[nH]c4c3cc(cc4)Cl
36543701	399.535	1.75	5.18	-12.94	3	6	79	0	6	c1ccc2c(c1)C[C@@H](NC2)C(=O)NCC3CCC(CC3)C(=O)NC[C@@H]4CCCO4
61562262	398.36	2.7	6.9	-26.26	2	6	76	0	6	c1cc(c(cc1C(=O)Nc2cnn(c2)CC(=O)NC3CCCC3)C(F)(F)F)F
77894016	396.878	2.69	8.14	-17.41	2	6	78	0	6	c1ccc2c(c1)CCN2C(=O)CCCNC(=O)Cc3c4cccc(c4[nH]n3)Cl
70864827	399.878	2.63	8.4	-22.53	2	6	79	0	6	Cc1ccc(cc1N2C[C@@H](CC2=O)C(=O)NCCC(=O)Nc3ccccc3)Cl
21137845	394.258	2.53	5.81	-19.09	2	6	79	0	5	CN(C)C(=O)c1cccc(c1)NC(=O)CNC(=O)c2ccc(c(c2)Cl)Cl
18049202	419.403	2.64	7.49	-15.84	2	6	79	0	6	Cc1ccc(cc1)CN2C[C@H](CC2=O)C(=O)NCC(=O)Nc3ccc(c(c3F)F)F
48368077	396.285	2.05	5.01	-17.16	2	6	79	0	6	c1cc(cc(c1)Br)C(=O)NCC(=O)NCCC(=O)N2CCCCC2
69720837	392.503	2.47	8.73	-14.54	2	6	65	0	5	CN1CCCc2c1ccc(c2)CNC(=O)NCc3cccc(c3)N4CCCC4=O
57170745	394.349	2.68	5.21	-12.36	2	6	77	0	6	c1c(cc(cc1F)F)C(=O)NCC(=O)NCCc2cc(cc3c2OCOC3)F
13724405	413.905	2.41	7.72	-16.41	2	6	79	0	6	c1ccc(cc1)C(=O)NCC(=O)N2CCC(CC2)C(=O)NCc3cccc(c3)Cl
55713825	390.468	2.85	9.18	-22.53	2	6	76	0	6	c1ccc(cc1)CNC(=O)c2ccc(cc2)NC(=O)Cc3cn4ccsc4n3
35485373	399.535	1.75	5.18	-13.54	3	6	79	0	6	c1ccc2c(c1)C[C@H](NC2)C(=O)NCC3CCC(CC3)C(=O)NC[C@@H]4CCCO4
77970530	393.468	2.44	6.48	-18.87	2	6	80	0	6	c1cc2cccnc2c(c1)OCCCNC(=O)c3ccc4c(c3)SCC(=O)N4
77117294	406.457	2.91	8.2	-16.38	2	5	70	0	6	c1ccc2c(c1)cccc2[C@H](CCNC(=O)[C@@H]3CC(=O)N(C3)c4ccc(cc4)F)O
62288431	394.258	2.92	6.05	-15.41	2	6	80	0	5	c1cc(cc(c1)NC(=O)[C@H]2CCCO2)CNC(=O)c3c(ccc(n3)Cl)Cl
67159299	391.471	2.53	8.23	-14.15	2	6	79	0	5	C[C@H](C(=O)N1CCc2c1cccc2)NC(=O)CNC(=O)c3ccc4c(c3)CCC4
68651909	390.487	2.86	8.67	-15.44	2	6	76	0	6	Cn1c2ccccc2nc1CNC(=O)c3ccc(cc3)CNC(=O)C4CCCC4
72033282	390.487	2.79	6.27	-11.33	2	6	66	0	5	C[C@H]1CN(CCO1)Cc2cccc(c2)CNC(=O)Nc3cccc4c3nccc4
67933409	392.499	2.74	8.52	-14.78	2	5	67	0	6	c1ccc2c(c1)CCC[C@@H]2C(=O)NCc3cccc(c3)C(=O)NC[C@H]4CCCO4
56681761	390.468	2.99	8.16	-25.51	2	6	76	0	5	c1ccc2c(c1)nc(s2)CNC(=O)Nc3ccc(cc3)Cn4ccccc4=O
53191611	398.413	2.9	8.11	-21.33	2	6	78	0	6	c1ccc2c(c1)[nH]c(n2)CCCNC(=O)[C@@H]3CCN(C3=O)c4ccc(c(c4)F)F
58664429	392.228	2.91	4.77	-15.55	3	5	70	0	4	c1cc2c(cc1NC(=O)NCCc3cc(ccc3F)Br)C(=O)NC2
46575593	416.319	2.97	5.75	-10.53	2	5	61	0	6	c1ccc2c(c1)CCN(C2)CCNC(=O)CNC(=O)c3ccc(cc3)Br
56342535	391.468	2.93	5.58	-18.52	2	6	79	0	6	c1cc(cc(c1)F)CNS(=O)(=O)c2cccc(c2)CNC(=O)N3CCCC3
65207717	395.431	2.89	4.76	-18.57	2	6	79	0	6	c1cc(cc(c1)S(=O)(=O)N2CCCC2)NC(=O)CNc3cccc(c3F)F
13040937	419.275	2.46	5.68	-18.21	2	6	77	0	6	c1ccc2c(c1)OC[C@@H](O2)CNC(=O)CCNC(=O)c3ccc(cc3)Br
65245418	391.471	2.24	7.15	-15.81	2	6	74	0	6	c1ccc2c(c1)cc(c(=O)[nH]2)CCC(=O)NCc3ccc(cc3)N4CCOCC4
13735858	413.905	2.39	7.63	-16.3	2	6	79	0	6	c1ccc(cc1)C(=O)NCC(=O)N2CCC(CC2)C(=O)NCc3ccccc3Cl
94031407	398.528	2.93	7.42	-17.61	2	5	75	0	6	c1ccc(cc1)S(=O)(=O)CCCNC(=O)N[C@H]2C[C@H]3CCCc4c3c2ccc4
66424152	394.45	2.66	6.67	-20.42	2	6	68	0	5	c1ccc2c(c1)cc([nH]2)C(=O)N3CCN(CC3)CCNC(=O)c4ccccc4F
67553834	390.487	2.9	6.34	-11.01	2	6	66	0	5	C[C@H]1CN(CCO1)Cc2cccc(c2)CNC(=O)Nc3cccc4c3ccnc4
55833704	397.45	1.99	7.74	-18.96	2	6	79	0	5	CC(=O)N1CCC[C@@H](C1)C(=O)NCc2cccc(c2)NC(=O)c3cccc(c3)F
78777717	394.45	2.73	8.29	-26.07	2	6	76	0	6	Cn1c2ccc(cc2nc1CCNC(=O)CC[C@H]3Cc4ccccc4NC3=O)F
32087728	416.275	2.44	6.68	-14.96	2	6	79	0	5	c1ccc(cc1)N2C[C@H](CC2=O)C(=O)NCC(=O)Nc3ccccc3Br
66344330	391.468	2.68	5.11	-22.6	2	6	79	0	5	CS(=O)(=O)c1cccc(c1)NC(=O)NC[C@@H]2CCN(C2)c3ccc(cc3)F
65698060	390.365	2.9	5.3	-14.79	3	6	79	0	6	c1cc(cc(c1)O)CNC(=O)NCc2ccc(cc2)n3ccc(n3)C(F)(F)F
41417461	390.487	2.68	8.51	-15.43	2	6	68	0	6	Cn1c2c(cn1)[C@@H](CCC2)NC(=O)NCc3ccc(cc3)COc4ccccc4
13944710	396.878	2.11	7.7	-18.45	2	6	78	0	6	c1ccnc(c1)CNC(=O)[C@H]2CC(=O)N(C2)CCc3c[nH]c4c3cc(cc4)Cl
32879006	402.445	2.07	5.57	-11.96	2	6	65	0	6	c1ccc(c(c1)CN2CCN(CC2)C(=O)CNC(=O)NCc3ccc(cc3)F)F
13944813	399.853	2.77	9.5	-19.42	2	5	65	0	5	c1cc(ccc1NC(=O)[C@@H]2CC(=O)N(C2)CCc3c[nH]c4c3cc(cc4)F)Cl
69208402	394.466	2.76	7.08	-22.7	2	6	65	0	6	c1cc(c(cc1N2CC[C@H](C2)CNC(=O)NCCC(=O)N3CCCCC3)F)F
68462867	390.212	2.99	6.44	-11.25	2	5	75	0	4	c1ccc2c(c1)c(=O)[nH]c(n2)C(=O)NCCc3cc(ccc3F)Br
68500210	397.431	2.97	6.18	-19.21	2	6	80	0	5	c1cc(ccc1Cc2nc(cs2)CC(=O)Nc3ccc4c(c3)NC(=O)CO4)F
68167880	392.43	2.65	7.89	-21.36	2	5	67	0	5	c1ccc2cc(ccc2c1)C(=O)NCCC(=O)N[C@@H]3CCOc4c3cc(cc4)F
55861850	407.392	2.63	5.93	-18.19	2	6	71	0	6	c1cc(cc(c1)NCC(=O)Nc2cccc(c2)C(F)(F)F)C(=O)N3CCOCC3
67936400	390.842	2.82	6.39	-16.59	2	5	67	0	6	c1cc(cc(c1)C(=O)NC[C@H]2CCCO2)CNC(=O)c3c(cccc3Cl)F
78919020	392.455	2.85	6.9	-12.21	2	6	80	0	6	c1ccc2c(c1)cc([nH]c2=O)C(=O)NCc3cccc(c3)COC4CCOCC4
57992896	396.365	2.35	3.1	-11.97	3	6	80	0	6	c1ccc2c(c1)[C@@H](CCO2)NC(=O)NC[C@@H](c3ccc(cc3)OC(F)(F)F)O
67152094	391.496	2.89	7.86	-12.94	2	5	71	0	6	c1ccc(cc1)c2csc(n2)CNC(=O)CNC(=O)c3ccc4c(c3)CCC4
61963515	394.83	2.79	4.22	-15.74	3	6	80	0	6	c1ccc(c(c1)[C@H](CNC(=O)NCCc2cc3c(c(c2)Cl)OCCO3)O)F
60403639	391.349	2.01	6.39	-16.11	2	6	79	0	5	c1cc(c(cc1N2CCCC2=O)NC(=O)CNC(=O)c3ccc(cc3F)F)F
63331856	390.842	2.82	6.37	-16.9	2	5	67	0	6	c1cc(cc(c1)C(=O)NC[C@@H]2CCCO2)CNC(=O)c3c(cccc3Cl)F
66285130	390.386	2.81	7.36	-21.94	2	6	77	0	5	CC(=O)Nc1cc(c(cc1F)F)NC(=O)COc2cccc3c2OC(C3)(C)C
58624551	396.466	2.89	8.94	-17.58	2	6	65	0	4	CN1CCCc2c1ccc(c2)CNC(=O)Nc3ccc(c(c3)N4CCCC4=O)F
4262945	403.482	1.4	8.98	-32.56	2	6	80	0	6	c1ccc2c(c1)ccn(c2=O)CC(=O)NCCC(=O)N[C@@H]3CCCc4c3cccc4
68544051	392.503	3	9.57	-16.6	2	6	65	0	6	C[C@@H]1Cc2ccccc2N1CCNC(=O)Nc3cccc(c3)CN4CCCC4=O
68166483	398.434	2.27	6.77	-17.63	2	6	77	0	6	c1cc2c(cc1OCCCC(=O)N[C@@H]3CCOc4c3cc(cc4)F)CCC(=O)N2
58469985	391.25	2.58	2.68	-16.9	2	6	80	0	4	c1cc2c(cc1NCc3nc(no3)c4cc(cs4)Br)C(=O)NC2
7154053	390.415	2.95	6.83	-20.05	2	6	76	0	6	Cn1c2ccccc2nc1SCC(=O)NCC(=O)Nc3ccc(c(c3)F)F
63316805	390.842	2.84	6.61	-14.91	2	5	67	0	6	c1cc(cc(c1)C(=O)NC[C@@H]2CCCO2)CNC(=O)c3ccc(cc3Cl)F
65604502	393.212	2.86	5.29	-14.86	2	5	67	0	4	c1cc2c(cc1C(=O)NCCc3cc(ccc3F)Br)OCC(=O)N2
63263594	393.487	2.81	7.21	-15.64	3	6	79	0	6	c1cc(cc(c1)C(=O)NC[C@@H]2CCCO2)CNC(=O)Nc3ccc4c(c3)CCC4
40073586	399.372	3	7.86	-14.42	2	5	71	0	6	c1cc(cc(c1)C(F)(F)F)CNC(=O)c2ccc(cc2)NC(=O)c3ccncc3
61962834	394.83	2.71	4.24	-12.67	3	6	80	0	5	c1cc(ccc1[C@H](CNC(=O)NCc2cc3c(c(c2)Cl)OCCCO3)O)F
54591231	390.487	2.91	9.42	-24.8	2	6	78	0	6	c1ccc2c(c1)[nH]c(n2)CCCC(=O)Nc3cccc(c3)C(=O)N4CCCCC4
77970343	395.484	1.69	7.39	-25.02	2	6	79	0	4	c1ccc2c(c1)CCCN2C(=O)CCNC(=O)c3ccc4c(c3)SCC(=O)N4
27081505	399.426	2.74	7.98	-15	2	6	76	0	6	c1ccc(cc1)n2cc(cn2)CNC(=O)CSc3[nH]c4cc(c(cc4n3)F)F
94031405	398.528	2.93	7.46	-17.68	2	5	75	0	6	c1ccc(cc1)S(=O)(=O)CCCNC(=O)N[C@H]2C[C@@H]3CCCc4c3c2ccc4
32843036	393.487	1.91	7.58	-28.65	2	6	79	0	6	Cc1cccc(c1)C(=O)NCCC(=O)NC2CCN(CC2)C(=O)c3ccccc3
48414872	392.503	2.39	8.86	-11.54	2	6	65	0	6	c1ccc2c(c1)CCN2Cc3ccc(cc3)CNC(=O)NCC(=O)N4CCCC4
69288041	393.487	2.85	8	-17.18	3	6	79	0	5	C[C@@H]1C[C@@H](c2c1cccc2)NC(=O)NCc3cccc(c3)NC(=O)[C@@H]4CCCO4
34899925	403.498	2.81	7.4	-17.76	2	6	79	0	6	c1cc(ccc1C(=O)NCCNC(=O)C2CCN(CC2)C(=O)C3CCCCC3)F
14001205	398.825	2.94	8.81	-15.93	2	6	80	0	5	c1cc(ccc1CNC(=O)CCn2cnc3c4cc(ccc4[nH]c3c2=O)F)Cl
67146086	395.814	2.91	4.5	-12.21	2	6	77	0	6	c1cc(ccc1OC[C@H](CNC(=O)c2cc3c(c(c2)Cl)OCCCO3)O)F
68950282	391.468	3	5.05	-20.6	2	6	79	0	6	C[C@H](C(=O)NCc1ccccc1)Nc2ccc(c(c2)N3CCCS3(=O)=O)F
69111380	394.83	2.68	4.15	-12.67	3	6	80	0	5	c1cc(cc(c1)F)[C@@H](CNC(=O)NCc2cc3c(c(c2)Cl)OCCCO3)O
70761381	404.466	2.51	6.69	-18.63	2	6	79	0	6	COc1cccc(c1)N2C[C@@H](CC2=O)C(=O)NC[C@@H](c3cccc4c3cccc4)O
54633428	392.377	2.7	6.5	-18.23	2	5	70	0	6	c1cc(cc(c1)N2C[C@@H](CC2=O)C(=O)NCCc3ccc(cc3)O)C(F)(F)F
25985591	405.248	2.67	5.04	-12.31	2	6	77	0	5	c1ccc2c(c1)OC[C@@H](O2)CNC(=O)CNC(=O)c3cccc(c3)Br
67538648	392.312	2.96	6.46	-11.86	2	6	76	0	5	c1cc(cc(c1)F)n2ccc(n2)C(=O)NCC(=O)Nc3ccc(c(c3F)F)F
47394174	392.484	2.52	7.83	-16.87	2	6	74	0	5	c1ccc(cc1)c2csc(n2)CNC(=O)Nc3cccc(c3)N4CCCC4=O
12922542	418.9	2.63	6.37	-11.37	2	6	65	0	6	c1cc(ccc1CNC(=O)NCC(=O)N2CCN(CC2)Cc3ccc(cc3)Cl)F
67318093	390.358	2.91	4.69	-16.01	2	5	75	0	6	c1cc(cc(c1)S(=O)(=O)C(F)F)NC(=O)NCCc2cc(cc(c2)F)F
65911201	391.221	2.65	4.12	-14.01	2	6	77	0	5	c1cc(ccc1OCCNC(=O)c2ccc3c(c2)OCC(=O)N3)Br
69717230	392.503	2.5	8.74	-15.57	2	6	65	0	5	CN1CCCc2c1ccc(c2)CNC(=O)NCc3ccc(cc3)N4CCCC4=O
65150584	404.323	2.41	6.96	-23.62	2	6	80	0	4	c1cc(cc(c1)NC(=O)Cn2c(=O)c3cnc4ccc(cc4c3[nH]2)F)C(F)(F)F
68381636	391.468	2.78	4.91	-18.97	2	6	79	0	6	CN1CCCc2c1ccc(c2)NC(=O)CCNS(=O)(=O)c3ccccc3F
67809604	391.471	1.69	6.28	-11.96	2	6	74	0	5	C[C@@H]1CN(CCO1)Cc2cccc(c2)CNC(=O)c3cc(=O)c4ccccc4[nH]3
20416497	394.862	2.88	8.04	-18.27	2	6	80	0	6	c1ccc2c(c1)c3cn[nH]c(=O)c3n2CCCC(=O)NCc4ccc(cc4)Cl
45834186	394.45	2.19	8.17	-18.63	2	6	78	0	5	c1ccc(c(c1)C(=O)N2CCC(CC2)NC(=O)CCc3[nH]c4ccccc4n3)F
69062678	397.45	2.31	6.66	-15.45	3	6	79	0	5	c1cc(cc(c1)NC(=O)C2CCC2)CNC(=O)N[C@@H]3CCOc4c3cc(cc4)F
91680862	393.34	2.92	6.52	-13.96	2	5	75	0	6	c1ccc2c(c1)[nH]c(=O)c(n2)CCC(=O)NCc3ccc(cc3F)C(F)(F)F
65454110	390.487	2.99	8.09	-23.39	3	6	77	0	4	Cc1c([nH]c2c1cc(cc2)CNC(=O)Nc3cccc(c3)C(=O)N4CCCC4)C
58617858	392.503	2.78	8.46	-22.15	2	6	65	0	4	CN1CCCc2c1ccc(c2)CNC(=O)Nc3cccc(c3)C(=O)N4CCCC4
47394605	392.484	2.49	8.47	-19.13	2	6	74	0	5	c1ccc(cc1)c2csc(n2)CNC(=O)Nc3ccccc3N4CCCC4=O
67933274	394.471	2.4	6.58	-14.53	2	6	77	0	6	c1ccc2c(c1)C[C@H](CO2)C(=O)NCc3cccc(c3)C(=O)NC[C@H]4CCCO4
68723124	390.487	2.56	8.86	-15.11	2	6	78	0	6	CN(Cc1[nH]c2ccccc2n1)C(=O)c3ccc(cc3)CNC(=O)C4CCCC4
67617780	399.516	2.56	6.58	-15.72	2	6	79	0	6	c1ccc(cc1)[C@H]2C[C@@H]2NC(=O)NCc3ccc(cc3)S(=O)(=O)N4CCCC4
70831672	395.406	2.19	4.25	-19.08	3	5	78	0	6	Cc1nc(cs1)c2cc([nH]c2)C(=O)NC[C@@H](c3ccccc3C(F)(F)F)O
19298311	399.447	2.93	7.51	-13.99	2	6	76	0	6	c1ccc2c(c1)OC[C@H](O2)CNC(=O)CSc3[nH]c(cn3)c4ccc(cc4)F
68480777	396.264	2.17	7.4	-14.94	2	6	72	0	5	c1cc(c(cc1Br)CCNC(=O)NCc2nnc3n2CCCC3)F
65879942	398.207	2.98	6.76	-20.85	2	5	71	0	6	c1cc(nc(c1)Br)NC(=O)CCCNC(=O)c2ccc(cc2F)F
78447428	395.503	2.81	6.81	-18.33	3	6	79	0	6	CC(=O)Nc1cccc(c1)OCCNC(=O)N[C@H]2CCC(c3c2cccc3)(C)C
68648769	394.471	2.7	7.49	-14.41	2	6	77	0	6	c1cc(ccc1CNC(=O)C2CCCC2)C(=O)NCc3ccc4c(c3)OCCO4
67153429	395.434	2.17	8.4	-19.35	2	6	79	0	5	c1cc2c(cc1C(=O)NCC(=O)Nc3ccc(c(c3)N4CCCC4=O)F)CCC2
67807527	394.258	2.92	6.05	-17.32	2	6	80	0	5	c1cc(cc(c1)NC(=O)[C@@H]2CCCO2)CNC(=O)c3c(ccc(n3)Cl)Cl
77928596	390.468	2.5	9.93	-19.75	2	6	76	0	6	c1cc(cc(c1)NC(=O)c2cccn3c2cnc3)CC(=O)NCc4cccs4
63797108	394.244	2.87	5.14	-16.68	3	5	70	0	6	c1ccc(c(c1)C(=O)NCCNC(=O)NCc2cccc(c2)Br)F
36543703	399.535	1.75	5.21	-12.74	3	6	79	0	6	c1ccc2c(c1)C[C@@H](NC2)C(=O)NCC3CCC(CC3)C(=O)NC[C@H]4CCCO4
62289720	394.258	2.45	5.95	-15.63	2	6	80	0	5	c1cc(cc(c1)NC(=O)[C@H]2CCCO2)CNC(=O)c3cc(c(nc3)Cl)Cl
68950279	391.468	3	5.05	-21.21	2	6	79	0	6	C[C@@H](C(=O)NCc1ccccc1)Nc2ccc(c(c2)N3CCCS3(=O)=O)F
36617876	392.312	2.83	6.85	-22.99	2	6	76	0	5	c1cc(c(cc1NC(=O)Cn2ccc(n2)C(=O)Nc3ccc(c(c3)F)F)F)F
31295020	390.386	1.61	4.47	-24.43	2	6	79	0	6	COc1cccc(c1)N2C[C@@H](CC2=O)C(=O)NC[C@H](c3ccc(c(c3)F)F)O
67808312	394.258	2.45	5.96	-15.19	2	6	80	0	5	c1cc(cc(c1)NC(=O)[C@@H]2CCCO2)CNC(=O)c3cc(c(nc3)Cl)Cl
68841656	394.45	2.54	6.96	-13.5	2	6	66	0	5	c1cc2cccnc2c(c1)CNC(=O)NCc3ccc(c(c3)F)N4CCOCC4
94016113	399.466	2.57	7.28	-14.48	2	6	71	0	6	COc1cc(cc(c1)F)CNC(=O)NCc2ccc(cc2)C(=O)N3CCCCC3
53191672	398.413	2.9	8.12	-17.55	2	6	78	0	6	c1ccc2c(c1)[nH]c(n2)CCCNC(=O)[C@@H]3CCN(C3=O)c4cc(cc(c4)F)F
13732770	407.489	2.13	9.79	-19.28	2	5	65	0	5	Cc1c(c2cc(ccc2[nH]1)F)CCNC(=O)C3CCN(CC3)C(=O)c4ccccc4
54138774	399.878	2.89	7.38	-16.61	2	6	79	0	6	Cc1cccc(c1)C(=O)NCCNC(=O)[C@@H]2CCN(C2=O)c3ccc(cc3)Cl
70836318	395.228	2.48	3.49	-12.38	3	5	78	0	6	c1cc(cc(c1)F)[C@H](CNC(=O)CNC(=O)c2cccc(c2)Br)O
48097261	394.5	2.86	7.35	-16.87	2	6	74	0	4	c1ccc2c(c1)nc(s2)CNC(=O)Nc3cccc(c3)C(=O)N4CCCCC4
68065463	396.34	2.29	5.59	-17.42	2	5	70	0	5	c1cc(c(cc1[C@@H](CNC(=O)[C@@H]2CCN(C2=O)c3ccc(c(c3)F)F)O)F)F
70963770	410.367	2.38	6.23	-15.74	2	5	70	0	6	c1cc(ccc1[C@@H](CNC(=O)[C@@H]2CC(=O)N(C2)c3ccc(cc3)F)O)C(F)(F)F
67156693	392.434	2.19	9.73	-15.47	2	6	76	0	6	c1cc(c(cc1CNC(=O)CNC(=O)c2ccc3c(c2)CCC3)F)n4ccnc4
55896571	399.394	2.92	4.18	-25.82	2	6	79	0	5	c1cc(c(cc1NC(=O)CNc2cc(ccc2F)N3CCCS3(=O)=O)F)F
67606710	393.487	2.49	8.12	-17.49	3	6	79	0	6	c1cc(cc(c1)NC(=O)[C@@H]2CCCO2)CNC(=O)NCc3ccc4c(c3)CCC4
44004037	405.442	2.86	5.49	-20.45	2	6	79	0	6	c1cc(cc(c1)NC(=O)NCC2CCN(CC2)S(=O)(=O)C3CC3)C(F)(F)F
47621488	390.487	2.45	7.83	-21	3	6	77	0	6	c1ccc2c(c1)c(c[nH]2)CCNC(=O)NCc3cccc(c3)C(=O)N4CCCC4
89878705	417.509	2.72	6.5	-22.11	2	6	73	0	6	c1ccc2cc(ccc2c1)C(=O)NCCC(=O)N3CCN(CC3)Cc4cccc(c4)O
67933272	394.471	2.4	6.56	-14.46	2	6	77	0	6	c1ccc2c(c1)C[C@H](CO2)C(=O)NCc3cccc(c3)C(=O)NC[C@@H]4CCCO4
68380959	394.349	2.47	6.59	-20.32	2	6	77	0	5	CC(=O)Nc1ccc(cc1NC(=O)Cc2ccc3c(c2)OCCO3)C(F)(F)F
32102027	403.841	2.31	6.52	-15.05	2	6	79	0	6	c1ccc(c(c1)CNC(=O)CNC(=O)[C@H]2CC(=O)N(C2)c3ccc(cc3)F)Cl
70927268	402.498	2.43	8.35	-18.01	2	6	74	0	5	c1ccc2c(c1)cccc2CNC(=O)NCC3CCN(CC3)C(=O)c4cccnc4
12890490	398.482	2.35	6.86	-10.53	2	6	65	0	6	Cc1ccccc1CN2CCN(CC2)C(=O)CNC(=O)NCc3ccc(cc3)F
89374727	409.461	2.37	8.08	-16.47	2	6	79	0	5	CN1[C@@H]([C@H](CC1=O)NC(=O)CNC(=O)c2ccc3c(c2)CCC3)c4ccc(cc4)F
46498662	396.365	2.5	3.69	-17.04	3	6	80	0	6	c1cc(c(cc1[C@@H](CNC(=O)NCCc2cc(cc3c2OCOC3)F)O)F)F
77894127	396.878	2.55	7.4	-21.03	2	6	78	0	5	c1cc2c(n[nH]c2c(c1)Cl)CC(=O)NCc3ccc(cc3)C(=O)N4CCCC4
66908568	390.487	3	7.14	-15.66	3	6	79	0	6	c1ccc(cc1)n2cc(cn2)CCNC(=O)NC[C@]3(CCCc4c3cccc4)O
69071628	396.365	2.55	3.69	-13	3	6	80	0	6	c1ccc(c(c1)[C@H](CNC(=O)NC[C@H]2COc3ccccc3O2)O)C(F)(F)F
67933615	391.471	2.6	7.56	-15.24	2	6	72	0	6	Cn1c2ccccc2cc1C(=O)NCc3cccc(c3)C(=O)NC[C@H]4CCCO4
66991887	394.45	2.66	6.38	-14.33	2	6	66	0	6	c1cc2cccnc2c(c1)NC(=O)CNCc3ccc(c(c3)F)N4CCOCC4
56669962	395.814	2.89	4.45	-12.08	2	6	77	0	6	c1cc(cc(c1)F)OC[C@@H](CNC(=O)c2cc3c(c(c2)Cl)OCCCO3)O
69459259	396.365	2	3.06	-14.33	3	6	80	0	6	c1cc(c(cc1OC[C@@H](CNC(=O)N[C@H]2CCOc3c2cc(cc3)F)O)F)F
68845344	398.26	2.9	6.23	-11.54	2	5	71	0	5	c1cc2cccnc2c(c1)CNC(=O)CNC(=O)c3ccc(cc3)Br
70926374	402.498	2.38	8.34	-17.04	2	6	74	0	5	c1ccc2c(c1)cccc2CNC(=O)NCC3CCN(CC3)C(=O)c4ccncc4
54787034	391.418	2.16	3.69	-13.76	3	6	74	0	6	c1cc(ccc1CNC(=O)NC[C@H](c2ccc(c(c2)F)F)O)N3CCOCC3
27845028	397.397	2.16	6.38	-14.34	2	6	79	0	5	c1ccc2c(c1)NC(=O)CN2C(=O)CCC(=O)N[C@@H]3CCC[C@@H](C3)C(F)(F)F
68885921	390.487	2.37	5.74	-12.83	2	6	66	0	6	c1ccc(cc1)CN2CCO[C@H](C2)CNC(=O)NCc3cccc4c3nccc4
69111383	394.83	2.68	4.24	-12.59	3	6	80	0	5	c1cc(cc(c1)F)[C@H](CNC(=O)NCc2cc3c(c(c2)Cl)OCCCO3)O
48247964	390.436	2.66	5.48	-14.13	2	6	69	0	5	c1cc2c(cc1OCCNC(=O)N[C@H]3CCSc4c3cc(cc4)F)OCO2
77952654	410.474	2.61	7.63	-20.39	2	6	76	0	6	c1cc(cc(c1)CNC(=O)c2cnn3c2SCC3)CC(=O)Nc4ccc(cc4)F
55315518	393.468	3	6.92	-21.71	2	6	79	0	6	CN(c1ccccc1)C(=O)c2cccc(c2)NC(=O)CNC(=O)c3ccsc3
14001177	398.825	2.92	8.8	-16.41	2	6	80	0	5	c1cc(cc(c1)Cl)CNC(=O)CCn2cnc3c4cc(ccc4[nH]c3c2=O)F
56006325	395.862	1.77	6.35	-23.36	2	6	79	0	6	c1cc(c(cc1F)Cl)C(=O)NCCC(=O)N2CCC(CC2)C(=O)NC3CC3
67105861	391.471	1.92	8.14	-16.76	2	6	79	0	6	c1cc(ccc1CNC(=O)CNC(=O)c2ccc3c(c2)CCC3)N4CCCC4=O
12978008	399.878	2.87	7.86	-14.14	2	6	79	0	6	Cc1c(cccc1Cl)NC(=O)CNC(=O)[C@H]2CC(=O)N(C2)Cc3ccccc3
53807874	390.386	1.63	4.6	-15.25	2	6	79	0	6	COc1ccc(cc1)[C@@H](CNC(=O)[C@@H]2CC(=O)N(C2)c3cc(cc(c3)F)F)O
56134764	397.45	2.73	7.44	-20.88	2	6	79	0	6	Cc1ccc(cc1C)N2CC[C@H](C2=O)C(=O)NCCNC(=O)c3ccccc3F
67150227	394.471	2.89	7.81	-13.41	2	6	77	0	5	C[C@H](c1ccc2c(c1)OCCCO2)NC(=O)CNC(=O)c3ccc4c(c3)CCC4
69436915	390.487	2.96	6.82	-18.07	3	6	73	0	6	C#CCN1CCC(CC1)C(=O)NCc2cccc(c2)NC(=O)Nc3ccccc3
55862272	391.83	2.55	5.47	-17.5	2	6	71	0	5	c1cc(ccc1C(=O)N2CCOCC2)NCC(=O)Nc3ccc(c(c3)Cl)F
68293647	393.487	2.71	8.84	-26.42	2	6	71	0	6	C[C@H]1Cc2ccccc2N1CCNC(=O)c3cccc(c3)NC(=O)[C@@H]4CCCO4
26527626	418.291	2.59	5.54	-10.99	2	6	73	0	4	c1ccc(c(c1)N2CCN(CC2)C(=O)CNC(=O)c3cccc(c3)Br)O
69292724	393.418	2.8	7.01	-14.88	2	6	72	0	5	c1cc(cc(c1)OCc2cccnc2)NC(=O)N[C@@H]3CCOc4c3cc(cc4)F
65780955	394.45	1.95	8.54	-22.7	2	6	78	0	5	c1ccc(c(c1)CCNC(=O)C2CCN(CC2)C(=O)c3c[nH]c4c3cccn4)F
58315156	394.45	2.34	7.93	-20.02	2	6	78	0	5	c1ccc(c(c1)CCNC(=O)C2CCN(CC2)C(=O)c3cccc4c3cn[nH]4)F
69090637	393.418	2.97	5.96	-13.4	2	6	72	0	5	c1ccc(cc1)Oc2ccc(cn2)CNC(=O)N[C@@H]3CCOc4c3cc(cc4)F
67567395	391.393	2.91	6.73	-16.09	3	5	70	0	6	CNC(=O)c1ccc(cc1)CNC(=O)N[C@@H]2C[C@H]2c3cccc(c3)C(F)(F)F
64397426	397.45	2.68	7.88	-16.7	2	6	79	0	6	c1ccc(cc1)CC(=O)N2CCC[C@@H](C2)C(=O)NCC(=O)Nc3ccc(cc3)F
57992898	396.365	2.35	3.1	-11.92	3	6	80	0	6	c1ccc2c(c1)[C@H](CCO2)NC(=O)NC[C@@H](c3ccc(cc3)OC(F)(F)F)O
1120107	393.365	2.83	6.19	-19.16	2	6	71	0	4	c1cc(cc(c1)NC(=O)Nc2ccc(cc2)C(=O)N3CCOCC3)C(F)(F)F
67913952	393.487	2.81	7.23	-15.41	3	6	79	0	6	c1cc(cc(c1)C(=O)NC[C@H]2CCCO2)CNC(=O)Nc3ccc4c(c3)CCC4
66136978	390.553	2.77	7.61	-13.68	2	6	74	0	6	C1CCc2c(nc(s2)CCCNC(=O)N3CCC[C@@H](C3)C(=O)NC4CC4)C1
68194136	394.443	2.81	5.61	-15.37	2	5	75	0	6	C[C@@H]1C[C@H](c2c1cccc2)NC(=O)CCNS(=O)(=O)c3ccc(c(c3)F)F
68065418	396.34	1.83	5.5	-17.07	2	5	70	0	5	c1cc(c(cc1[C@H](CNC(=O)[C@@H]2CC(=O)N(C2)c3cc(cc(c3)F)F)O)F)F
54140495	397.45	2.73	7.54	-20.84	2	6	79	0	6	Cc1cc(cc(c1)N2CC[C@H](C2=O)C(=O)NCCNC(=O)c3ccccc3F)C
36621832	418.316	2.88	5.89	-18.7	2	5	71	0	6	c1ccc2c(c1)nc(s2)CNC(=O)CCNC(=O)c3ccc(cc3)Br
54116227	393.434	2.04	6.48	-20.87	2	6	79	0	6	c1c(cc(cc1F)F)N2C[C@@H](CC2=O)C(=O)NCCC(=O)NC3CCCCC3
66086939	393.487	2.9	7.56	-18.81	2	6	71	0	6	c1ccc2c(c1)CCCN2C(=O)CNc3cccc(c3)C(=O)NC[C@@H]4CCCO4
67662632	398.406	2.89	5.85	-18.31	2	5	75	0	5	CS(=O)(=O)c1ccc(cc1)NC(=O)N[C@@H]2C[C@H]2c3cccc(c3)C(F)(F)F
69208808	394.466	3	7.26	-20.83	2	6	65	0	6	c1cc(c(cc1N2CC[C@H](C2)CNC(=O)NCCN3CCCCCC3=O)F)F
79023386	403.408	2.98	9.63	-18.31	2	6	72	0	6	Cc1nc(n(n1)Cc2cccc(c2)NC(=O)NCc3cccc(c3)C(F)(F)F)C
57004783	398.482	2.46	4.31	-13.34	3	6	68	0	5	c1ccc2c(c1)C[C@@H]([C@@H]2NC(=O)NCCN3CCN(CC3)c4ccc(cc4)F)O
67032714	397.45	2.88	6.3	-17.11	2	6	71	0	6	c1cc(cc(c1)F)[C@@H]2C[C@H]2C(=O)Nc3ccc(cc3)NC(=O)CN4CCOCC4
53305187	397.45	2.78	7.53	-18.51	2	6	79	0	6	Cc1ccc(cc1)N2CC[C@H](C2=O)C(=O)NCCNC(=O)c3ccc(c(c3)F)C
63314546	393.487	2.54	6.67	-16.07	3	6	79	0	6	c1ccc2c(c1)CC[C@@H]2NC(=O)NCc3cccc(c3)C(=O)NC[C@@H]4CCCO4
58264809	410.222	2.76	6.32	-15.38	2	6	76	0	6	c1cc(ccc1c2cc([nH]n2)C(=O)NCCc3nccn3C(F)F)Br
57004777	394.519	2.63	5.07	-11.27	3	6	68	0	5	C[C@@H](CNC(=O)N[C@@H]1c2ccccc2C[C@@H]1O)N3CCN(CC3)c4ccccc4
48271636	391.393	2.78	8.1	-15.8	2	5	61	0	6	c1cc(cc(c1)N2CCCC2=O)CNC(=O)NCc3ccc(cc3)C(F)(F)F
44455197	390.484	1.38	4.54	-16.99	2	6	65	0	6	c1cc(ccc1CNC(=O)NCCN2CCN(CC2)C(=O)c3ccsc3)F
67146085	395.814	2.91	4.45	-12.28	2	6	77	0	6	c1cc(ccc1OC[C@@H](CNC(=O)c2cc3c(c(c2)Cl)OCCCO3)O)F
69208807	394.466	3	7.24	-19.93	2	6	65	0	6	c1cc(c(cc1N2CC[C@@H](C2)CNC(=O)NCCN3CCCCCC3=O)F)F
23995485	398.482	2.35	6.17	-11.48	2	6	65	0	6	Cc1ccc(cc1)CNC(=O)NCC(=O)N2CCN(CC2)Cc3ccccc3F
48832959	390.487	2.68	8.51	-15.41	2	6	68	0	6	Cn1c2c(cn1)[C@@H](CCC2)NC(=O)NCc3ccc(cc3)OCc4ccccc4
69109905	398.36	2.19	4.65	-14.63	3	6	75	0	6	c1cc2c(cc1F)[C@H](CCO2)NC(=O)NCCNc3ccc(cn3)C(F)(F)F
67336151	390.361	2.57	7.79	-20.91	2	5	79	0	4	c1cc(cc(c1)C(F)(F)F)[C@H]2C[C@@H]2NC(=O)c3cc4c([nH]c3=O)CCCC4=O
68543709	392.503	2.84	8.81	-25.24	2	6	65	0	5	C[C@@H]1Cc2ccccc2N1CCNC(=O)Nc3cccc(c3)C(=O)N4CCCC4
57992905	396.365	2.35	3.01	-11.99	3	6	80	0	6	c1ccc2c(c1)[C@H](CCO2)NC(=O)NC[C@H](c3ccc(cc3)OC(F)(F)F)O
23042591	390.365	2.94	6.13	-36	2	6	78	0	6	CN(Cc1[nH]c2ccccc2c(=O)n1)CC(=O)Nc3cccc(c3)C(F)(F)F
44004040	405.442	2.88	5.47	-18.18	2	6	79	0	6	c1cc(ccc1C(F)(F)F)NC(=O)NCC2CCN(CC2)S(=O)(=O)C3CC3
70963669	392.377	2.21	6.15	-16.02	2	5	70	0	6	c1ccc(cc1)N2C[C@@H](CC2=O)C(=O)NC[C@H](c3ccc(cc3)C(F)(F)F)O
65992423	393.487	2.88	8.39	-15.94	2	6	79	0	6	Cc1cc(cc(c1)C(=O)NCC(=O)N[C@H](C)c2ccc(cc2)N3CCCC3=O)C
63326803	392.814	2.65	5.61	-22.53	2	6	77	0	6	c1ccc(c(c1)C(=O)NCCCNC(=O)c2cc3c(c(c2)Cl)OCCO3)F
70963745	406.404	2.66	6.84	-15.95	2	5	70	0	6	Cc1ccc(cc1)N2C[C@@H](CC2=O)C(=O)NC[C@H](c3ccc(cc3)C(F)(F)F)O
57992900	396.365	2.35	3.01	-11.97	3	6	80	0	6	c1ccc2c(c1)[C@@H](CCO2)NC(=O)NC[C@H](c3ccc(cc3)OC(F)(F)F)O
68271869	390.237	2.99	5.69	-12.22	2	6	80	0	6	Cc1c(c[nH]n1)CNC(=O)c2ccc(o2)COc3cccc(c3)Br
65698073	390.365	2.92	5.3	-14.81	3	6	79	0	6	c1cc(ccc1CNC(=O)NCc2ccc(cc2)O)n3ccc(n3)C(F)(F)F
77953646	390.468	2.53	7.74	-16.84	2	6	76	0	6	c1cc2cc(cn2nc1)C(=O)NCc3ccc(cc3)C(=O)NCc4cccs4
66086940	393.487	2.9	7.58	-18.66	2	6	71	0	6	c1ccc2c(c1)CCCN2C(=O)CNc3cccc(c3)C(=O)NC[C@H]4CCCO4
68675071	390.386	2.6	5.59	-18.7	2	6	77	0	6	C[C@H](c1ccc2c(c1)OCCO2)C(=O)NCCNC(=O)c3ccc(cc3F)F
69288055	393.487	2.85	8.08	-16.95	3	6	79	0	5	C[C@@H]1C[C@H](c2c1cccc2)NC(=O)NCc3cccc(c3)NC(=O)[C@@H]4CCCO4
69537710	391.471	2.27	8.05	-16.52	2	6	79	0	5	C[C@@H]1C[C@@H](c2c1cccc2)NC(=O)CNC(=O)c3ccc(cc3)N4CCCC4=O
12903626	415.44	2.61	7.6	-19.64	2	6	79	0	5	Cc1ccccc1C(=O)N2CCC(CC2)C(=O)NCC(=O)Nc3ccc(c(c3)F)F
58664544	390.237	2.67	3.62	-14.85	3	6	79	0	5	c1cc(cc(c1)Br)OCCNC(=O)Nc2ccc3c(c2)C(=O)NC3
47508028	394.5	2.32	7.84	-15.87	2	6	74	0	6	CC(=O)N(C)Cc1cccc(c1)NC(=O)NCc2nc(cs2)c3ccccc3
12775718	404.873	2.9	7.23	-11.42	2	6	65	0	5	c1cc(cc(c1)Cl)N2CCN(CC2)C(=O)CNC(=O)NCc3ccc(cc3)F
44035565	394.349	2.47	6.79	-19.07	2	6	77	0	6	c1ccc2c(c1)OC[C@H](O2)C(=O)Nc3ccc(cc3)CC(=O)NCC(F)(F)F
66286074	390.777	2.56	7.31	-14.19	2	6	76	0	4	CC(=O)Nc1cc(c(cc1F)F)NC(=O)c2cnn(c2)c3ccc(cc3)Cl
13944892	395.434	2.12	8.28	-19.64	2	6	74	0	6	COc1cccc(c1)NC(=O)[C@H]2CC(=O)N(C2)CCc3c[nH]c4c3cc(cc4)F
67606546	393.487	2.14	7.65	-17.91	3	6	79	0	5	c1ccc2c(c1)CCC[C@@H]2NC(=O)NCc3cccc(c3)NC(=O)[C@H]4CCCO4
25133039	412.895	2.85	4.98	-14.45	2	5	75	0	6	c1cc(cc(c1)Cl)S(=O)(=O)NCCNC(=O)c2cc3cc(ccc3s2)F
67047045	392.912	1.84	5.84	-11.31	2	6	74	0	5	c1cc(ccc1CNC(=O)NCC(=O)N2CCC[C@H](C2)c3nccs3)Cl
67159298	391.471	2.53	8.19	-14.32	2	6	79	0	5	C[C@@H](C(=O)N1CCc2c1cccc2)NC(=O)CNC(=O)c3ccc4c(c3)CCC4
51482723	395.228	2.42	3.64	-20.36	3	5	78	0	6	c1cc(cc(c1)NC(=O)CCNC(=O)c2cc(ccc2Br)F)CO
67047044	392.912	1.84	5.83	-11.37	2	6	74	0	5	c1cc(ccc1CNC(=O)NCC(=O)N2CCC[C@@H](C2)c3nccs3)Cl
62291105	391.471	2.54	5.74	-10.87	2	6	74	0	5	C[C@H]1CN(CCO1)Cc2cccc(c2)CNC(=O)c3cc4ccccc4c(=O)[nH]3
56322638	392.434	2.93	9.47	-11.46	2	6	76	0	6	C[C@@H]1C[C@H]1C(=O)Nc2ccc(cc2C(=O)NCc3cnn(c3)c4ccccc4)F
69918012	393.896	2.51	5.75	-15.25	2	6	72	0	6	c1c(cc(c2c1OCCO2)Cl)CCNC(=O)NCc3csc(n3)C4CC4
13944829	395.434	2.15	8.27	-20.72	2	6	74	0	6	COc1ccc(cc1)NC(=O)[C@@H]2CC(=O)N(C2)CCc3c[nH]c4c3cc(cc4)F
35371989	410.474	2.7	9.32	-16.75	2	6	80	0	6	CSc1ccc(cc1)CNC(=O)CCn2cnc3c4cc(ccc4[nH]c3c2=O)F
69104344	394.244	2.91	5.13	-12.81	3	5	70	0	6	c1cc(cc(c1)Br)CNC(=O)NCCNC(=O)c2ccc(cc2)F
66638842	390.365	1.9	4.76	-15.85	2	6	80	0	6	Cn1cc(cn1)c2cc(cnc2)C(=O)NC[C@H](c3cccc(c3)C(F)(F)F)O
92187575	399.466	2.46	7.98	-17.36	2	6	71	0	6	CNC(=O)c1cccc(c1)CNC(=O)N2CCC(CC2)OCc3ccccc3F
65119680	392.455	2.81	8.3	-13.66	2	6	80	0	6	Cc1c([nH]c2c1cc(cc2)CNC(=O)CCC(=O)c3ccc4c(c3)OCCO4)C
15271779	391.221	2.81	4.39	-12.67	2	6	77	0	5	c1cc(cc(c1)Br)C(=O)NCC(=O)NCc2ccc3c(c2)OCO3
66089485	393.487	2.92	7.57	-15.41	2	6	71	0	6	c1ccc2c(c1)CCCN2C(=O)CNc3ccc(cc3)C(=O)NC[C@@H]4CCCO4
66908732	390.487	2.99	6.79	-12.58	3	6	79	0	6	c1ccc2c(c1)CCC[C@]2(CNC(=O)NCc3ccc(cc3)Cn4cccn4)O
14001193	398.825	2.89	8.71	-16.69	2	6	80	0	5	c1ccc(c(c1)CNC(=O)CCn2cnc3c4cc(ccc4[nH]c3c2=O)F)Cl
77932350	398.509	2.97	7.51	-13.4	2	5	71	0	6	c1cc(oc1)CNC(=O)c2ccc(cc2)CNC(=O)c3cc4c(s3)SCC4
69208401	394.466	2.76	7.06	-21.88	2	6	65	0	6	c1cc(c(cc1N2CC[C@@H](C2)CNC(=O)NCCC(=O)N3CCCCC3)F)F
55861255	391.471	2.25	8.72	-14.41	2	6	78	0	6	c1ccc(cc1)c2ccc([nH]2)CCC(=O)NC3CCN(CC3)C(=O)c4ccoc4
68293646	393.487	2.71	8.75	-26.6	2	6	71	0	6	C[C@@H]1Cc2ccccc2N1CCNC(=O)c3cccc(c3)NC(=O)[C@@H]4CCCO4
69346436	399.394	2.8	4.73	-19.43	2	6	79	0	4	c1cc(c(cc1NC(=O)NCc2cc(cc(c2)F)F)N3CCCS3(=O)=O)F
62291107	391.471	1.69	6.26	-11.99	2	6	74	0	5	C[C@H]1CN(CCO1)Cc2cccc(c2)CNC(=O)c3cc(=O)c4ccccc4[nH]3
14196605	399.878	2.69	7.56	-17.01	2	6	79	0	6	C[C@@H](c1ccccc1Cl)NC(=O)CNC(=O)c2ccc(cc2)N3CCCC3=O
69459248	396.365	2	3.06	-14.38	3	6	80	0	6	c1cc(c(cc1OC[C@@H](CNC(=O)N[C@@H]2CCOc3c2cc(cc3)F)O)F)F
66084147	407.392	2.65	5.98	-18.54	2	6	71	0	6	c1cc(cc(c1)NCC(=O)Nc2ccc(cc2)C(=O)N3CCOCC3)C(F)(F)F
77952582	392.484	2.76	7.67	-27.19	2	6	76	0	6	c1ccc(cc1)CCNC(=O)c2cccc(c2)NC(=O)c3cnn4c3SCC4
69427682	393.365	1.78	4.27	-17.92	3	6	79	0	5	c1cc(c(cc1F)F)C(=O)NCCNC(=O)N[C@@H]2CCOc3c2cc(cc3)F
55862269	418.291	2.59	5.53	-14.83	2	6	71	0	5	c1cc(ccc1C(=O)N2CCOCC2)NCC(=O)Nc3ccc(cc3)Br
95393802	401.894	2.22	4.76	-19.76	2	6	73	0	6	c1cc(cc(c1)O)CN2CCN(CC2)C(=O)CCNC(=O)c3ccc(cc3)Cl
69207949	391.447	2.97	7.54	-18.39	2	6	62	0	5	c1cc(c(cc1N2CC[C@H](C2)CNC(=O)NCc3cn4ccsc4n3)F)F
63677764	392.846	2.69	9.26	-18.85	2	6	80	0	5	c1ccc2c(c1)ncn2Cc3cccc(c3)CNC(=O)c4cc(c(=O)[nH]c4)Cl
52099936	408.477	2.63	7.44	-19.86	2	6	68	0	6	c1ccc(c(c1)CNC(=O)CN2CCN(CC2)C(=O)Cc3c[nH]c4c3cccc4)F
67163012	390.358	2.56	3.84	-17.91	2	5	75	0	6	CNS(=O)(=O)c1cccc(c1)CNC(=O)c2ccc(c(c2)C(F)(F)F)F
28644002	394.443	2.1	5.46	-15.06	2	5	75	0	6	c1ccc2c(c1)CCC[C@H]2NC(=O)CCNS(=O)(=O)c3ccc(c(c3)F)F
55896433	399.394	2.92	4.28	-25.35	2	6	79	0	5	c1cc(c(cc1N2CCCS2(=O)=O)NCC(=O)Nc3cc(cc(c3)F)F)F
70927275	406.408	2.42	7.3	-17.38	2	6	74	0	5	c1ccc(c(c1)C(F)(F)F)NC(=O)NCC2CCN(CC2)C(=O)c3cccnc3
56121516	393.434	2.51	6.63	-18.01	2	6	79	0	6	c1c(cc(cc1F)F)N2CC[C@H](C2=O)C(=O)NCCC(=O)NC3CCCCC3
69293103	397.45	3	6.82	-18.6	3	6	79	0	4	c1cc(ccc1C(=O)NC2CCCC2)NC(=O)N[C@@H]3CCOc4c3cc(cc4)F
7956707	395.431	2.91	4.75	-21.42	2	6	79	0	6	c1cc(cc(c1)S(=O)(=O)N2CCCC2)NCC(=O)Nc3ccc(c(c3)F)F
67606544	393.487	2.14	7.67	-17.03	3	6	79	0	5	c1ccc2c(c1)CCC[C@@H]2NC(=O)NCc3cccc(c3)NC(=O)[C@@H]4CCCO4
41975917	390.484	1.85	5.03	-10.89	2	6	65	0	6	c1cc(sc1)CN2CCN(CC2)C(=O)CNC(=O)NCc3ccc(cc3)F
17860380	405.248	2.43	4.89	-12.45	2	6	77	0	5	c1cc(cc(c1)Br)C(=O)NCC(=O)NCc2ccc3c(c2)OCCO3
79501373	406.461	2.63	9.51	-25.76	2	6	80	0	6	CC(C)n1c(=O)c2ccccc2c(n1)CC(=O)NCCc3c[nH]c4c3cc(cc4)F
29982155	394.5	2.2	6.88	-26.64	2	6	74	0	6	Cc1nc(cs1)c2cccc(c2)NC(=O)CNc3cccc(c3)C(=O)N(C)C
66929377	397.5	3	7.45	-11.49	2	6	80	0	6	Cn1ccnc1SCc2ccc(o2)C(=O)NC[C@]3(CCCc4c3cccc4)O
66693197	395.434	2.47	7.35	-28.56	2	6	74	0	5	c1ccc2c(c1)c(c[nH]2)C(=O)NCCC(=O)N3CCO[C@H](C3)c4cccc(c4)F
69108087	398.532	2.89	7.8	-22.8	2	6	74	0	6	c1ccc(cc1)N2CC[C@H](C2=O)NC(=O)NCCCc3nc4c(s3)CCCC4
68065464	396.34	2.29	5.68	-18.66	2	5	70	0	5	c1cc(c(cc1[C@H](CNC(=O)[C@@H]2CCN(C2=O)c3ccc(c(c3)F)F)O)F)F
69104484	390.281	2.77	5.97	-9.2	3	5	70	0	6	C[C@@H](C(=O)NCc1ccccc1)NC(=O)NCc2cccc(c2)Br
90616982	391.471	2.62	8.15	-16.99	2	6	75	0	5	c1ccc2c(c1)cccc2CNC(=O)NCC3CCN(CC3)C(=O)c4ccoc4
69916995	393.896	2.38	5.76	-11.95	2	6	72	0	5	c1c(cc(c2c1OCCCO2)Cl)CNC(=O)NCc3csc(n3)C4CC4
65874665	390.487	2.97	9.95	-20.88	2	6	66	0	5	Cn1cc(c2c1cccc2)CC(=O)NCc3cccc(c3)NC(=O)N4CCCC4
41178151	393.487	2.66	7.84	-14.53	2	6	71	0	5	c1ccc2c(c1)C[C@@H](O2)CNC(=O)NCc3cccc(c3)C(=O)N4CCCCC4
92045972	391.471	2.83	8.03	-15.35	2	6	74	0	6	COc1cccc(c1)CN2C[C@@H](CCC2=O)C(=O)NCc3cc4ccccc4[nH]3
91669197	399.497	2.81	6.65	-20.07	2	6	80	0	6	c1cc(sc1)CC(=O)Nc2nc(cs2)CC(=O)Nc3ccc4c(c3)COC4
68672696	397.519	1.81	8.01	-21.22	2	6	79	0	6	c1cc(ccc1CNC(=O)C2CCCC2)C(=O)N3CCC(CC3)C(=O)NC4CC4
15557415	419.275	2.22	5.53	-18.66	2	6	77	0	6	c1cc(ccc1C(=O)NCCC(=O)NCc2ccc3c(c2)OCCO3)Br
65212456	396.756	2.42	6.22	-17.91	2	6	80	0	5	c1cc(ccc1CNC(=O)c2cc(c(=O)[nH]c2)Cl)n3ccc(n3)C(F)(F)F
61963402	394.83	2.66	4.24	-12.53	3	6	80	0	5	c1ccc(c(c1)[C@H](CNC(=O)NCc2cc3c(c(c2)Cl)OCCCO3)O)F
69459253	396.365	2	3.12	-14.28	3	6	80	0	6	c1cc(c(cc1OC[C@H](CNC(=O)N[C@@H]2CCOc3c2cc(cc3)F)O)F)F
69260916	392.793	2.03	6.67	-18.09	2	6	80	0	5	Cc1nc(nn1c2ccccc2Cl)C(=O)NC[C@@H](c3ccc(cc3F)F)O
92187568	399.466	2.51	7.78	-18.26	2	6	71	0	6	CNC(=O)c1cccc(c1)CNC(=O)N2CCC(CC2)OCc3ccc(cc3)F
68166484	398.434	2.27	6.77	-17.59	2	6	77	0	6	c1cc2c(cc1OCCCC(=O)N[C@H]3CCOc4c3cc(cc4)F)CCC(=O)N2
67564997	396.871	2.76	5.8	-20.71	2	5	75	0	6	c1cc(cc(c1)F)[C@@H]2C[C@H]2NC(=O)NCCS(=O)(=O)c3ccc(cc3)Cl
69288047	393.487	2.85	8.08	-17.24	3	6	79	0	5	C[C@H]1C[C@@H](c2c1cccc2)NC(=O)NCc3cccc(c3)NC(=O)[C@@H]4CCCO4
62088013	391.515	2.81	9.81	-14.21	2	5	61	0	5	c1cc(cc(c1)C(=O)N2CCCCC2)CNC(=O)NCc3ccc4c(c3)CCC4
69111448	394.45	2.72	6.56	-14.69	3	6	79	0	6	c1ccc(cc1)n2c3c(c(n2)CNC(=O)NC[C@H](c4cccc(c4)F)O)CCC3
64766243	392.814	2.56	6.08	-22.2	2	6	77	0	5	CC(=O)Nc1ccc(c(c1)C(=O)NCCc2cc3c(c(c2)Cl)OCCO3)F
58665050	390.237	2.69	3.63	-15.14	3	6	79	0	5	c1cc(ccc1OCCNC(=O)Nc2ccc3c(c2)C(=O)NC3)Br
67972286	396.878	3	6.32	-17.45	3	6	77	0	5	c1cc(ccc1CNC(=O)Cc2c[nH]c3c2ccc(c3)Cl)N4CCNC(=O)C4
51614465	393.365	2.89	6.94	-19.36	2	6	71	0	6	c1cc(cc(c1)OC(F)F)CNC(=O)Nc2ccc(c(c2)N3CCCC3=O)F
77893671	396.878	2.57	7.4	-19.7	2	6	78	0	5	c1cc(ccc1CNC(=O)Cc2c3ccc(cc3[nH]n2)Cl)C(=O)N4CCCC4
68841692	390.487	2.14	7.87	-17.24	2	6	74	0	6	CC(C)N(C)C(=O)c1ccc(cc1)CNC(=O)NCc2cccc3c2nccc3
67931421	393.487	2.54	6.7	-16.24	3	6	79	0	6	c1ccc2c(c1)CC[C@@H]2NC(=O)NCc3cccc(c3)C(=O)NC[C@H]4CCCO4
46314188	397.45	1.99	7.72	-18.8	2	6	79	0	5	CC(=O)N1CCC[C@H](C1)C(=O)Nc2ccc(cc2)C(=O)NCc3ccccc3F
66747395	390.487	2.49	8.66	-16.02	2	6	78	0	6	CN(CCc1ccccn1)C(=O)CNC(=O)c2ccc3c(c2)c4c([nH]3)CCCC4
66908731	390.487	2.99	6.82	-12.55	3	6	79	0	6	c1ccc2c(c1)CCC[C@@]2(CNC(=O)NCc3ccc(cc3)Cn4cccn4)O
68065370	398.409	2.56	8.05	-19.16	2	5	71	0	6	Cc1cccc(c1)Cn2cccc(c2=O)C(=O)NC[C@H](c3ccc(c(c3)F)F)O
41789371	391.258	2.82	7.27	-19.18	2	6	76	0	6	c1cc(ccc1C(=O)NCCC(=O)NCc2cn3cc(ccc3n2)Cl)Cl
52820807	393.468	2.5	7.21	-17.85	2	6	80	0	6	c1ccc(cc1)c2csc(n2)CNC(=O)COc3ccc4c(c3)CCC(=O)N4
70926382	406.408	2.37	7.3	-15.87	2	6	74	0	5	c1ccc(c(c1)C(F)(F)F)NC(=O)NCC2CCN(CC2)C(=O)c3ccncc3
94036400	391.515	2.91	9.5	-19.15	2	5	61	0	5	CN(C)C(=O)c1cccc(c1)CCNC(=O)N[C@@H]2C[C@@H]3CCCc4c3c2ccc4
24080270	394.88	2.39	5.2	-18.28	2	6	77	0	6	c1cc(sc1)C(=O)NCCC(=O)NCc2cc3c(c(c2)Cl)OCCCO3
67158707	396.516	2.36	7.7	-26.5	2	6	78	0	5	Cc1ccc2c(c1)[nH]c(n2)[C@H]3CCCN(C3)C(=O)CCNC(=O)c4ccsc4
54116279	393.434	2.51	6.62	-18.26	2	6	79	0	6	c1cc(c(cc1N2CC[C@H](C2=O)C(=O)NCCC(=O)NC3CCCCC3)F)F
67528492	391.393	2.96	8.13	-21.17	2	5	61	0	5	CN(C)C(=O)c1cccc(c1)NC(=O)N[C@@H]2C[C@H]2c3cccc(c3)C(F)(F)F
70963774	410.367	2.38	6.31	-15.7	2	5	70	0	6	c1cc(ccc1[C@H](CNC(=O)[C@@H]2CC(=O)N(C2)c3ccc(cc3)F)O)C(F)(F)F
70926385	406.408	2.39	7.07	-21.24	2	6	74	0	5	c1cc(cc(c1)NC(=O)NCC2CCN(CC2)C(=O)c3ccncc3)C(F)(F)F
12747104	395.242	2.93	5.24	-11.84	2	6	77	0	5	c1cc2c(cc1CNC(=O)CNC(=O)c3ccc(c(c3)Cl)Cl)OCCO2
67646503	395.463	2.43	8.05	-16.24	2	6	72	0	5	Cc1nccn1c2ccc(cc2F)CNC(=O)NCc3nc4ccccc4s3
69930730	390.484	1.84	5.74	-11.82	2	6	66	0	6	c1cc(c(cc1CNC(=O)NCc2csc(n2)C3CC3)F)N4CCOCC4
13724837	402.857	2.84	7.9	-25.68	2	6	76	0	6	CC(=O)Nc1ccc2c(c1)nc(n2C)CCCNC(=O)c3ccc(c(c3)Cl)F
12604051	390.487	2.61	8.96	-17.57	2	6	78	0	6	c1ccc(cc1)CNC(=O)C2CCN(CC2)C(=O)CCc3[nH]c4ccccc4n3
67732741	391.393	2.42	6.71	-18.04	3	5	74	0	4	c1cc(cc(c1)C(F)(F)F)[C@@H]2C[C@H]2NC(=O)N[C@@H]3CCCc4c3ccc(=O)[nH]4
64561422	392.503	2.96	9.28	-16.88	2	6	65	0	5	CN1CCCc2c1ccc(c2)NC(=O)NCc3ccc(cc3)CN4CCCC4=O
67152624	391.471	1.89	8.13	-17.12	2	6	79	0	6	c1cc(cc(c1)N2CCCC2=O)CNC(=O)CNC(=O)c3ccc4c(c3)CCC4
67158720	390.487	2.92	8.78	-15.63	2	6	78	0	4	Cc1cccc(c1)C(=O)NCC(=O)N2CCC[C@@H](C2)c3[nH]c4cc(ccc4n3)C
67607427	395.503	1.96	5.44	-10.2	2	6	63	0	5	C[C@H]1CN(CCO1)Cc2cccc(c2)CNC(=O)N[C@@H]3CCOc4c3cccc4
68675070	390.386	2.6	5.59	-18.62	2	6	77	0	6	C[C@@H](c1ccc2c(c1)OCCO2)C(=O)NCCNC(=O)c3ccc(cc3F)F
19748148	396.516	1.92	7.45	-31.61	2	6	78	0	6	Cc1nc(cs1)CC(=O)N2CC[C@@H](C2)C(=O)NCCc3c[nH]c4c3cccc4
90616983	395.381	2.6	7.15	-15.45	2	6	75	0	5	c1ccc(c(c1)C(F)(F)F)NC(=O)NCC2CCN(CC2)C(=O)c3ccoc3
67107730	392.427	2.5	6	-19.32	2	5	75	0	6	c1cc(cc(c1)F)[C@@H]2C[C@H]2NC(=O)c3ccc(c(c3)S(=O)(=O)NC4CC4)F
62251979	392.434	2.63	8.61	-16.89	2	6	74	0	6	CN(Cc1ccccn1)C(=O)Nc2ccc(cc2)C(=O)NCc3ccccc3F
13944735	396.878	2.04	7.75	-18.39	2	6	78	0	6	c1cc(cnc1)CNC(=O)[C@@H]2CC(=O)N(C2)CCc3c[nH]c4c3cc(cc4)Cl
94036534	398.528	2.84	7.22	-19.08	2	5	75	0	5	CS(=O)(=O)c1ccc(cc1)CCNC(=O)N[C@@H]2C[C@H]3CCCc4c3c2ccc4
72052608	419.275	2.98	5.71	-12.35	2	6	77	0	6	c1ccc(cc1)CCNC(=O)CNC(=O)c2cc3c(c(c2)Br)OCCO3
12718503	391.471	2.55	8.15	-16.07	2	6	74	0	6	COc1cccc(c1)CN2C[C@@H](CCC2=O)C(=O)NCc3cccc4c3cc[nH]4
66285825	390.777	2.75	7.3	-15.46	2	6	76	0	4	CC(=O)Nc1cc(c(cc1F)F)NC(=O)c2cnn(c2)c3cccc(c3)Cl
31296580	391.805	2.8	6.32	-17.67	2	5	67	0	6	c1ccc(c(c1)Cn2cc(cn2)C(=O)NC[C@@H](c3ccc(c(c3)F)F)O)Cl
64252056	398.466	2.91	8.74	-15.8	3	6	79	0	4	c1ccc2c(c1)C[C@H]([C@H]2NC(=O)NCc3ccc(cc3)n4cnc5c4cccc5)O
67933273	394.471	2.4	6.58	-14.12	2	6	77	0	6	c1ccc2c(c1)C[C@@H](CO2)C(=O)NCc3cccc(c3)C(=O)NC[C@H]4CCCO4
66216858	391.83	2.52	5.49	-16.88	2	6	71	0	5	c1cc(cc(c1)NC(=O)CNc2ccc(c(c2)Cl)F)C(=O)N3CCOCC3
67808814	391.471	2.96	9.23	-15.91	2	6	72	0	6	CCn1c2ccccc2cc1C(=O)NCc3cccc(c3)NC(=O)[C@@H]4CCCO4
72097020	396.406	2.94	4.84	-19.47	2	5	75	0	6	CC1CCC(CC1)NS(=O)(=O)CC(=O)Nc2ccc(c(c2)C(F)(F)F)F
77470810	402.498	2.21	8.88	-16.61	2	6	78	0	5	c1cc(cnc1)CN2C[C@H](CC2=O)C(=O)NCc3ccc4c(c3)c5c([nH]4)CCCC5
66689718	395.434	2.45	7.37	-29.99	2	6	74	0	5	c1ccc2c(c1)c(c[nH]2)C(=O)NCCC(=O)N3CCO[C@H](C3)c4ccccc4F
67567390	391.393	2.91	6.73	-16.53	3	5	70	0	6	CNC(=O)c1ccc(cc1)CNC(=O)N[C@H]2C[C@@H]2c3cccc(c3)C(F)(F)F
67412880	394.519	2.98	7.56	-15.53	3	6	73	0	6	CC(C)NC(=O)c1cccc(c1)CNC(=O)NCc2ccc3c(c2)CCCN3C
18049294	419.403	2.94	7.6	-15.67	2	6	79	0	6	CCc1ccc(cc1)N2C[C@H](CC2=O)C(=O)NCC(=O)Nc3ccc(c(c3F)F)F
38678452	408.479	2.84	8.46	-19.78	2	6	77	0	6	c1ccc2c(c1)OC[C@H](O2)C(=O)Nc3ccc(cc3)CC(=O)NCc4cccs4
58688971	398.825	2.97	8.32	-18.51	2	6	76	0	5	c1ccc(c(c1)n2cc(cn2)C(=O)Nc3ccc(c(c3)C(=O)NC4CC4)Cl)F
67193546	395.434	2.17	8.15	-14.4	2	6	79	0	5	c1cc2c(cc1C(=O)NCC(=O)Nc3cc(ccc3F)N4CCCC4=O)CCC2
50637903	391.349	2.54	6.31	-14.72	2	6	79	0	5	c1cc(cc(c1)F)NC(=O)CNC(=O)[C@H]2CCN(C2=O)c3cc(cc(c3)F)F
89782901	398.89	2.42	7.59	-15.6	2	5	70	0	5	c1cc(ccc1[C@@H](CNC(=O)[C@@H]2CC(=O)N(C2)c3ccc4c(c3)CCC4)O)Cl
67809601	391.471	2.54	5.76	-10.92	2	6	74	0	5	C[C@@H]1CN(CCO1)Cc2cccc(c2)CNC(=O)c3cc4ccccc4c(=O)[nH]3
94036402	391.515	2.91	9.54	-19.39	2	5	61	0	5	CN(C)C(=O)c1cccc(c1)CCNC(=O)N[C@@H]2C[C@H]3CCCc4c3c2ccc4
77860522	390.468	2.45	9.41	-14.85	2	6	76	0	6	c1cc2cc(ncn2c1)C(=O)NCc3ccc(cc3)C(=O)NCc4cccs4
24461509	390.358	2.71	3.63	-19.11	2	5	75	0	6	Cc1ccc(cc1F)C(=O)NCCNS(=O)(=O)c2ccc(c(c2F)F)F
58747290	396.45	2.89	9.03	-18.67	2	6	76	0	5	c1ccc(cc1)n2c3ccccc3nc2CCC(=O)Nc4ccc5c(c4)C(=O)NC5
68194132	394.443	2.81	5.58	-14.94	2	5	75	0	6	C[C@@H]1C[C@@H](c2c1cccc2)NC(=O)CCNS(=O)(=O)c3ccc(c(c3)F)F
67992118	399.878	2.96	8.31	-18.07	2	6	78	0	4	Cc1ccc(o1)C(=O)NC2CCN(CC2)C(=O)Cc3c[nH]c4c3ccc(c4)Cl
32752900	398.438	2.61	8.09	-15.98	2	5	71	0	6	c1cc(ccc1CCNC(=O)CSc2c3c(cnn2)c4cc(ccc4[nH]3)F)F
69207948	391.447	2.97	7.52	-17.63	2	6	62	0	5	c1cc(c(cc1N2CC[C@@H](C2)CNC(=O)NCc3cn4ccsc4n3)F)F
13944931	413.88	2.47	9.62	-14.16	2	5	65	0	6	c1cc(ccc1CNC(=O)[C@@H]2CC(=O)N(C2)CCc3c[nH]c4c3cc(cc4)F)Cl
24906517	415.419	2.6	7.43	-16.67	2	6	80	0	5	c1cc(cnc1)C(=O)NC2CCC(CC2)Nc3c4ccc(nc4ccn3)C(F)(F)F
63318380	391.471	2.6	7.54	-15.2	2	6	72	0	6	Cn1c2ccccc2cc1C(=O)NCc3cccc(c3)C(=O)NC[C@@H]4CCCO4
66089486	393.487	2.92	7.59	-15.26	2	6	71	0	6	c1ccc2c(c1)CCCN2C(=O)CNc3ccc(cc3)C(=O)NC[C@H]4CCCO4
55896455	395.431	2.62	4.2	-23.89	2	6	79	0	6	c1ccc(c(c1)CNC(=O)CNc2cc(ccc2F)N3CCCS3(=O)=O)F
12747303	405.495	2.88	6.01	-13.88	2	6	79	0	6	c1ccc(c(c1)CNC(=O)NCc2ccc(cc2)S(=O)(=O)N3CCCCC3)F
69398129	391.83	2.16	4.64	-16.92	3	6	79	0	5	c1ccc(c(c1)C(=O)NCCNC(=O)N[C@@H]2CCOc3c2cc(cc3)F)Cl
70963733	406.404	2.66	6.93	-15.95	2	5	70	0	6	Cc1ccc(cc1)N2C[C@@H](CC2=O)C(=O)NC[C@@H](c3ccc(cc3)C(F)(F)F)O
66232679	390.487	2.52	6.98	-17.39	3	6	79	0	6	c1ccc(cc1)Cn2c3c(cn2)[C@@H](CCC3)NC(=O)NCCc4cccc(c4)O
94036533	398.528	2.84	7.22	-19.08	2	5	75	0	5	CS(=O)(=O)c1ccc(cc1)CCNC(=O)N[C@H]2C[C@@H]3CCCc4c3c2ccc4
65992414	393.487	2.88	8.28	-16.25	2	6	79	0	6	Cc1ccc(cc1C)C(=O)NCC(=O)N[C@H](C)c2ccc(cc2)N3CCCC3=O
79479231	401.873	2.65	8.5	-15.95	2	6	74	0	5	c1cc2c(cc1F)c(c[nH]2)CCNC(=O)[C@H]3CCCN(C3)c4ccc(nn4)Cl
67646455	391.45	2.82	9.37	-17.76	3	6	75	0	6	Cc1nccn1c2ccc(cc2F)CNC(=O)NCCc3c[nH]c4c3cccc4
28644006	394.443	2.1	5.46	-14.89	2	5	75	0	6	c1ccc2c(c1)CCC[C@@H]2NC(=O)CCNS(=O)(=O)c3ccc(c(c3)F)F
94032636	392.503	2.15	8.46	-14.65	2	6	74	0	6	CN(CCc1ccccn1)C(=O)CNC(=O)N[C@H]2C[C@@H]3CCCc4c3c2ccc4
68708093	390.487	3	8.8	-18.55	3	6	77	0	6	C[C@H](c1cccc(c1)N2CCCC2=O)NC(=O)NCCc3c[nH]c4c3cccc4
68063262	396.874	2.98	8.45	-17.55	2	5	71	0	6	Cc1cccc(c1)Cn2cccc(c2=O)C(=O)NC[C@H](c3ccc(cc3)Cl)O
22400576	393.44	2.78	6.71	-26.26	2	5	71	0	6	c1cc(c(cc1c2csc(n2)NC(=O)CCNC(=O)c3ccsc3)F)F
55861852	391.83	2.52	5.49	-18.3	2	6	71	0	5	c1cc(cc(c1)NCC(=O)Nc2ccc(c(c2)Cl)F)C(=O)N3CCOCC3
68793530	399.491	2.59	8.85	-18.26	2	5	65	0	5	c1cc(sc1)CCNC(=O)C2CCN(CC2)C(=O)c3cc4cc(ccc4[nH]3)F
52526950	403.891	2.51	6.37	-18.02	2	6	76	0	4	Cc1nc(cs1)c2cc([nH]c2)C(=O)NCc3cc4c(c(c3)Cl)OCCCO4
20416486	394.862	2.86	8.03	-18.73	2	6	80	0	6	c1ccc2c(c1)c3cn[nH]c(=O)c3n2CCCC(=O)NCc4cccc(c4)Cl
48252889	394.45	2.94	8.21	-14.65	2	6	68	0	5	Cn1c2c(cn1)[C@@H](CCC2)NC(=O)NCc3ccc(cc3)Oc4ccc(cc4)F
69969580	396.394	2.28	4.02	-14.01	2	6	80	0	6	Cn1cc(cn1)c2ncc(s2)C(=O)NC[C@H](c3cccc(c3)C(F)(F)F)O
13944889	401.388	2.35	9.16	-13.39	2	5	65	0	5	c1cc2c(cc1F)c(c[nH]2)CCN3C[C@@H](CC3=O)C(=O)Nc4ccc(cc4F)F
67617783	399.516	2.56	6.58	-15.77	2	6	79	0	6	c1ccc(cc1)[C@@H]2C[C@H]2NC(=O)NCc3ccc(cc3)S(=O)(=O)N4CCCC4
14422342	414.937	2.91	6.97	-10.73	2	6	65	0	6	Cc1ccc(cc1)CNC(=O)NCC(=O)N2CCN(CC2)Cc3ccc(cc3)Cl
61339416	399.497	2.23	5.93	-22.57	2	6	80	0	6	c1cc2c(cc1c3csc(n3)NC(=O)CCNC(=O)c4ccsc4)COC2
67044009	394.349	2.71	5.3	-11.37	2	6	77	0	6	c1cc(c2c(c1)OCCO2)CNC(=O)CNC(=O)c3ccc(cc3)C(F)(F)F
67986518	392.846	2.76	8.35	-25.84	2	6	80	0	5	c1cc(cc(c1)NC(=O)Cc2c[nH]c3c2ccc(c3)Cl)Cn4cccnc4=O
72038272	417.239	2.9	4.75	-16.08	3	5	78	0	6	C[C@H](C(=O)NC[C@@H](c1ccc(c(c1)F)F)O)NC(=O)c2cccc(c2Cl)Cl
68167881	392.43	2.65	7.89	-21.37	2	5	67	0	5	c1ccc2cc(ccc2c1)C(=O)NCCC(=O)N[C@H]3CCOc4c3cc(cc4)F
67984418	398.644	2.96	3.91	-11.77	2	6	72	0	4	c1cc(ncc1CNC(=O)NCc2cc3c(c(c2)Br)OCO3)Cl
65889991	395.253	2.47	4.18	-13.12	2	6	73	0	6	c1cc(oc1)CNC(=O)CNCc2cc3c(c(c2)Br)OCCCO3
65567824	393.212	2.86	5.27	-14.31	2	5	67	0	4	c1cc2c(cc1C(=O)NCCc3cc(ccc3F)Br)NC(=O)CO2
67316306	390.358	2.88	4.61	-15.12	2	5	75	0	6	c1cc(cc(c1)S(=O)(=O)C(F)F)NC(=O)NCCc2c(cccc2F)F
70853508	390.418	2.64	9.89	-23.36	2	6	80	0	6	c1ccc2c(c1)c(c[nH]2)CC(=O)NCCn3cnc(cc3=O)c4ccc(cc4)F
67561701	391.468	2.3	5.45	-16.63	2	6	79	0	6	CN(C)S(=O)(=O)c1ccc(cc1)CNC(=O)N[C@H]2C[C@@H]2c3cccc(c3)F
48827247	392.503	2.68	7.26	-11.45	2	6	77	0	6	C[C@@H]1CN(C[C@H](O1)C)Cc2ccc(cc2)CNC(=O)NCc3ccc(cc3)C#N
46654894	399.498	2.56	9.97	-16.11	2	6	76	0	6	c1ccc(cc1)Cn2c3c(cn2)[C@@H](CCC3)NC(=O)CCc4[nH]c5ccccc5n4
27980757	390.237	2.73	4.96	-17.54	2	6	80	0	6	c1cc(ccc1CCNC(=O)c2ccc(o2)Cn3cc(cn3)Br)O
68713651	393.487	2.86	8.39	-16.16	2	6	79	0	6	Cc1cc(cc(c1)C(=O)NCC(=O)N[C@@H](C)c2cccc(c2)N3CCCC3=O)C
68480396	396.34	2.59	6.01	-11.53	2	5	67	0	5	c1cc(ccc1C(=O)NCC(=O)N[C@H]2CCOc3c2cc(cc3)F)C(F)(F)F
52099953	404.514	2.92	8.22	-18.06	2	6	68	0	6	Cc1ccccc1CNC(=O)CN2CCN(CC2)C(=O)Cc3c[nH]c4c3cccc4
42361070	395.431	2.94	4.8	-15.36	2	6	79	0	6	c1cc(ccc1NCC(=O)Nc2cc(ccc2F)F)S(=O)(=O)N3CCCC3
94119259	390.53	2.75	5.43	-16.8	2	5	75	0	6	c1cc2c3c(c1)[C@@H](C[C@@H]3CCC2)NC(=O)CCNS(=O)(=O)c4cccs4
77197162	405.227	2.7	5.04	-11.02	2	6	80	0	5	c1ccc(cc1)[C@H](Cn2cc(nn2)C(=O)Nc3ccc(cc3F)Br)O
23327254	395.503	2.17	7.4	-18.81	2	6	79	0	6	CC(C)C(=O)NCCNC(=O)[C@H]1CCCN(C1)C(=O)c2cccc3c2cccc3
13944734	396.878	2.04	7.74	-15.16	2	6	78	0	6	c1cc(cnc1)CNC(=O)[C@H]2CC(=O)N(C2)CCc3c[nH]c4c3cc(cc4)Cl
65199869	397.422	2.92	5.96	-12.72	2	5	71	0	6	c1cc(ccc1CNC(=O)c2csc(n2)C(=O)NC3CCCC3)C(F)(F)F
64033344	392.793	2.03	6.67	-19.6	2	6	80	0	5	Cc1nc(nn1c2ccccc2Cl)C(=O)NC[C@@H](c3ccc(c(c3)F)F)O
60547662	393.896	2.9	5.78	-24.63	2	6	79	0	6	c1ccc(cc1)CNS(=O)(=O)CCNC(=O)N2CCc3c2cc(cc3)Cl
65992420	399.878	2.69	7.58	-17.1	2	6	79	0	6	C[C@H](c1ccc(cc1)N2CCCC2=O)NC(=O)CNC(=O)c3ccccc3Cl
63733784	398.409	2.56	8.14	-19.13	2	5	71	0	6	Cc1cccc(c1)Cn2cccc(c2=O)C(=O)NC[C@@H](c3ccc(c(c3)F)F)O
94032637	392.503	2.15	8.46	-14.68	2	6	74	0	6	CN(CCc1ccccn1)C(=O)CNC(=O)N[C@@H]2C[C@H]3CCCc4c3c2ccc4
67919161	391.269	2.77	6.31	-18.09	3	6	77	0	5	c1ccc2c(c1)CCN2CCCNC(=O)Nc3cc(c[nH]c3=O)Br
13040936	419.275	2.46	5.62	-18.31	2	6	77	0	6	c1ccc2c(c1)OC[C@H](O2)CNC(=O)CCNC(=O)c3ccc(cc3)Br
77952649	398.532	2.66	7.36	-18.52	2	6	76	0	6	c1cc(cc(c1)CNC(=O)c2cnn3c2SCC3)CC(=O)NC4CCCCC4
46804735	395.503	2.6	8.27	-14.66	2	6	71	0	6	Cc1ccc(cc1)CNC(=O)c2cccc(c2)CNC(=O)N3CCC(CC3)OC
92165504	393.365	2.87	4.65	-14.73	3	6	79	0	6	c1cc(ccc1C(=O)NCCNC(=O)Nc2ccc3c(c2)COC3)C(F)(F)F
65199861	408.321	2.81	5.57	-12.5	2	5	71	0	5	c1cc(cc(c1)Br)CNC(=O)c2csc(n2)C(=O)NC3CCCC3
66346932	398.482	2.98	8.72	-16.39	2	6	65	0	6	CC(=O)N(C)Cc1cccc(c1)NC(=O)NC[C@@H]2CCN(C2)c3ccc(cc3)F
55754171	390.487	2.99	9.18	-15.4	2	6	78	0	5	C[C@@H]1CCCCN1C(=O)c2ccc(cc2)NC(=O)CCc3[nH]c4ccccc4n3
55243694	398.406	2.95	5.28	-15.96	2	5	75	0	6	c1ccc2c(c1)CC[C@H]2NS(=O)(=O)c3cccc(c3)C(=O)NCC(F)(F)F
67761002	390.487	2.9	9.25	-12.02	2	6	70	0	6	Cc1c(c(on1)C)CNC(=O)NCc2ccc(cc2)CN3CCc4c3cccc4
67554647	393.431	2.24	3.89	-17.26	2	6	79	0	6	CS(=O)(=O)N1CCC[C@@H](C1)NC(=O)NCCc2ccc(cc2)C(F)(F)F
9376603	394.5	1.88	7.49	-24.37	2	6	78	0	6	c1ccc(cc1)CNC(=O)Cc2nc(cs2)c3cc([nH]c3)C(=O)N4CCCC4
28648019	391.221	2.57	4.7	-14.85	2	6	77	0	4	c1ccc(c(c1)C(=O)NCC(=O)Nc2ccc3c(c2)OCCO3)Br
67663317	398.406	2.86	5.85	-22.17	2	5	75	0	5	CS(=O)(=O)c1cccc(c1)NC(=O)N[C@H]2C[C@@H]2c3cccc(c3)C(F)(F)F
12761442	413.905	2.44	7.75	-14.99	2	6	79	0	6	c1ccc(cc1)CNC(=O)C2CCN(CC2)C(=O)CNC(=O)c3ccc(cc3)Cl
57783235	395.484	2.53	6.71	-15.56	2	6	71	0	4	c1ccc2c(c1)c(cs2)CNC(=O)Nc3cccc(c3)C(=O)N4CCOCC4
69073874	399.466	1.73	4.76	-11.46	2	6	63	0	5	c1cc(cc(c1)CN2CCOCC2)CNC(=O)N[C@@H]3CCOc4c3cc(cc4)F
42523718	394.349	2.78	5.36	-11.52	2	6	77	0	6	c1ccc2c(c1)OC[C@H](O2)CNC(=O)CNC(=O)c3ccc(cc3)C(F)(F)F
67173277	391.471	1.9	7.75	-12.68	2	6	79	0	5	c1ccc2c(c1)CCN(C2)C(=O)CNC(=O)CNC(=O)c3ccc4c(c3)CCC4
68242431	391.471	2.37	9.28	-20.95	2	6	72	0	6	Cn1cc(c2c1cccc2)CC(=O)NCc3cccc(c3)NC(=O)[C@H]4CCCO4
94055882	393.487	2.78	6.16	-11.62	2	6	72	0	5	c1cc2c3c(c1)[C@H](C[C@@H]3CCC2)NC(=O)NCc4ccnc(c4)O[C@@H]5CCOC5
67910146	395.503	2.53	7.82	-12.91	2	6	71	0	5	Cc1ccc(cc1)CNC(=O)NCc2ccc(cc2)C(=O)N3C[C@H](O[C@@H](C3)C)C
67090451	393.413	2.38	9.02	-14.95	2	6	72	0	6	c1cc(cc(c1)C(F)(F)F)C2(CC2)CNC(=O)NCc3nnc4n3CCCC4
35598343	397.91	2.87	5.2	-12.81	2	6	64	0	6	c1ccc(c(c1)CNC(=O)CN2CCN(CC2)Cc3[nH]c4ccccc4n3)Cl
67568450	398.429	2.99	5.77	-16.69	2	6	65	0	6	CCNC(=O)CN1CCN(CC1)C(=O)N[C@@H]2C[C@H]2c3cccc(c3)C(F)(F)F
92616370	399.466	2.62	8.2	-13.53	2	6	71	0	6	Cc1cccc(c1)NC(=O)NCC(=O)N2CCC(CC2)OCc3ccc(cc3)F
61015582	391.5	2.58	8.96	-16.2	2	6	72	0	6	Cc1csc(n1)CNC(=O)NCc2ccc(cc2)Cn3cnc4c3cccc4
90746260	395.503	2.25	6.75	-15.12	2	6	73	0	6	Cc1ccc(cc1C)N2C[C@@H](CC2=O)C(=O)NC[C@H](c3ccc(cc3)N(C)C)O
39420682	390.487	1.95	8.4	-19.2	2	6	78	0	6	Cc1c(c2ccccc2[nH]1)CCNC(=O)[C@@H]3CCC(=O)N(C3)Cc4ccccn4
93292621	399.466	2.54	8.42	-17.11	2	6	71	0	6	CC(=O)Nc1cccc(c1)CNC(=O)N2CCC(CC2)OCc3ccc(cc3)F
50766226	395.434	2.66	7.73	-18.46	2	6	74	0	6	COc1ccc(cc1)N2C[C@@H](CC2=O)C(=O)NCCc3c[nH]c4c3ccc(c4)F
89374724	409.461	2.37	7.98	-17.42	2	6	79	0	5	CN1[C@H]([C@@H](CC1=O)NC(=O)CNC(=O)c2ccc3c(c2)CCC3)c4ccc(cc4)F
47163735	393.274	2.53	7.14	-17.61	2	6	74	0	6	c1cc(ccc1C(=O)NCCNc2c(cc(cn2)Cl)Cl)N3CCCC3=O
6225839	397.298	2.72	5.71	-17.77	2	6	80	0	6	c1cc(ccc1c2nc([nH]n2)SCC(=O)NC[C@@H]3CCCO3)Br
66932125	392.843	2.83	7.04	-16.71	2	6	76	0	6	c1cc(c(cc1Cn2c(ccn2)NC(=O)CNC(=O)c3ccsc3)F)Cl
62290929	391.471	1.67	5.79	-12.38	2	6	74	0	5	C[C@H]1CN(CCO1)Cc2cccc(c2)CNC(=O)c3cc4ccccc4[nH]c3=O
55862253	418.291	2.56	5.58	-13.82	2	6	71	0	5	c1cc(cc(c1)Br)NC(=O)CNc2ccc(cc2)C(=O)N3CCOCC3
69111445	394.45	2.72	6.64	-14.98	3	6	79	0	6	c1ccc(cc1)n2c3c(c(n2)CNC(=O)NC[C@@H](c4cccc(c4)F)O)CCC3
58334850	396.248	2.52	9.7	-15.12	2	6	76	0	4	c1ccc2c(c1)c(c([nH]2)C(=O)NCc3ccc(cc3)n4cncn4)Br
67606711	393.487	2.49	8.1	-16.02	3	6	79	0	6	c1cc(cc(c1)NC(=O)[C@H]2CCCO2)CNC(=O)NCc3ccc4c(c3)CCC4
67987887	395.89	2.95	9.63	-17.86	2	5	65	0	6	c1cc(ccc1CNC(=O)Cc2c[nH]c3c2ccc(c3)Cl)CN4CCCC4=O
77929093	390.468	2.14	9.28	-15.29	2	6	76	0	6	c1cc(sc1)CNC(=O)c2ccc(cc2)CNC(=O)c3ccc4cncn4c3
64253000	391.365	2.51	3.42	-13.86	2	6	63	0	6	c1c(cc(c2c1COCO2)CCNC(=O)N[C@H]3CCN(C3)CC(F)(F)F)F
31294320	396.34	1.83	5.86	-21.37	2	5	70	0	5	c1cc(c(cc1[C@H](CNC(=O)[C@@H]2CC(=O)N(C2)c3ccc(cc3F)F)O)F)F
63733868	394.805	2.72	5.95	-15.07	2	5	70	0	5	c1cc(ccc1N2CC[C@H](C2=O)C(=O)NC[C@H](c3ccc(c(c3)F)F)O)Cl
68956663	412.433	2.94	5.73	-17.03	2	5	75	0	6	c1ccc2c(c1)CCC[C@@H]2NC(=O)CNS(=O)(=O)c3cccc(c3)C(F)(F)F
69398141	391.83	2.16	4.64	-16.92	3	6	79	0	5	c1ccc(c(c1)C(=O)NCCNC(=O)N[C@H]2CCOc3c2cc(cc3)F)Cl
32862470	391.393	2.78	8.06	-17.75	2	5	61	0	6	c1cc(cc(c1)C(F)(F)F)CNC(=O)NCc2ccc(cc2)N3CCCC3=O
57481211	390.358	2.58	3.85	-18.11	2	5	75	0	6	CNC(=O)c1ccc(cc1)CNS(=O)(=O)c2ccc(c(c2)C(F)(F)F)F
67562350	395.478	2.84	9.4	-15.87	2	5	61	0	5	c1cc(cc(c1)C(=O)N2CCCCC2)CNC(=O)N[C@@H]3C[C@H]3c4cccc(c4)F
47144810	399.516	2.98	6.93	-14.58	2	6	79	0	5	c1cc(ccc1CNC(=O)Nc2ccc3c(c2)CCC3)S(=O)(=O)N4CCCC4
61339496	399.497	2.54	6	-20.43	2	6	80	0	6	c1cc(sc1)C(=O)NCCC(=O)Nc2nc(cs2)c3ccc4c(c3)COC4
66136979	390.553	2.77	7.64	-13.73	2	6	74	0	6	C1CCc2c(nc(s2)CCCNC(=O)N3CCC[C@H](C3)C(=O)NC4CC4)C1
47957400	395.532	2.93	5.49	-12.53	2	6	60	0	6	c1ccc(cc1)N2CCN(CC2)CCNC(=O)NCc3nc4ccccc4s3
92167126	395.503	2.93	6.05	-10.11	2	6	63	0	5	C[C@H]1CN(C[C@@H](O1)C)Cc2ccc(cc2)CNC(=O)Nc3ccc4c(c3)COC4
59324559	395.434	2.66	7.73	-18.42	2	6	74	0	6	COc1ccc2c(c1)c(c[nH]2)CCNC(=O)[C@@H]3CC(=O)N(C3)c4ccc(cc4)F
67646253	394.45	2.91	9.23	-15.33	2	6	68	0	5	Cc1nccn1c2ccc(cc2F)CNC(=O)NC[C@H]3Cc4ccccc4OC3
68320682	394.381	2.92	8.97	-23.66	2	6	80	0	5	c1ccn(c(=O)c1)Cc2ccc(cc2)NC(=O)c3ccc4c(c3)nc([nH]4)C(F)F
32862439	405.495	2.93	6.02	-15.02	2	6	79	0	6	c1cc(ccc1CNC(=O)NCc2ccc(cc2)S(=O)(=O)N3CCCCC3)F
68167652	396.462	2.75	8.22	-15.31	2	5	67	0	5	c1cc(ccc1CNC(=O)C2CCCC2)C(=O)N[C@@H]3CCOc4c3cc(cc4)F
44595637	390.487	2.37	8.18	-17.31	2	6	76	0	6	Cc1ccc(cc1)CNC(=O)c2cccc(c2)CNC(=O)c3c(nn(c3C)C)C
63162899	390.534	2.88	6.29	-21.86	2	6	74	0	6	Cc1csc(n1)Sc2ccc(cc2)NC(=O)NCCC(=O)N3CCCC3
32752902	406.486	2.1	8.94	-13.93	2	5	71	0	4	c1ccc2c(c1)CCC[C@H]2NC(=O)CSc3c4c(cnn3)c5cc(ccc5[nH]4)F
50139298	393.896	2.84	5.6	-19.31	2	6	79	0	5	CNS(=O)(=O)Cc1cccc(c1)CNC(=O)N2CCc3c2cc(cc3)Cl
69110300	391.418	2.14	4.14	-12.65	3	6	74	0	6	c1cc(cc(c1)F)[C@@H](CNC(=O)NCc2ccc(c(c2)F)N3CCOCC3)O
67336331	398.406	2.77	5.23	-15.83	2	5	75	0	6	CNS(=O)(=O)c1ccc(cc1)C(=O)N[C@@H]2C[C@H]2c3cccc(c3)C(F)(F)F
64887961	390.365	2.54	7.07	-23.35	2	6	76	0	6	CC(=O)Nc1ccc(cc1)C(=O)NCCn2c3ccccc3nc2C(F)(F)F
61015387	391.5	2.58	8.95	-16.83	2	6	72	0	6	Cc1nc(cs1)CNC(=O)NCc2ccc(cc2)Cn3cnc4c3cccc4
67931220	391.471	2.52	6.92	-15.07	3	6	79	0	6	c1ccc(cc1)C#CCNC(=O)NCc2cccc(c2)C(=O)NC[C@H]3CCCO3
66747340	390.487	2.46	8.8	-14.68	2	6	78	0	6	CN(CCc1ccccn1)C(=O)CNC(=O)c2cccc3c2[nH]c4c3CCCC4
69572075	392.253	2.77	5.31	-17.15	3	6	79	0	6	CNC(=O)COc1cccc(c1)NC(=O)NCc2cccc(c2)Br
68355024	396.406	2.94	4.77	-19.6	2	5	75	0	6	CC1CCC(CC1)NS(=O)(=O)CC(=O)Nc2cc(ccc2F)C(F)(F)F
66348071	397.381	2.93	6.34	-16.22	2	6	80	0	6	CC(=O)Nc1cc(c(cc1F)F)NC(=O)c2ccnc(c2)OCc3ccccc3
8076390	394.5	2.6	8.04	-25.64	2	6	78	0	5	Cc1cccc(c1)NC(=O)Cc2nc(cs2)c3cc([nH]c3)C(=O)N4CCCC4
77909081	395.509	2.78	8.49	-14.09	2	5	63	0	6	c1cc(sc1)CNC(=O)c2ccc(cc2)CNC(=O)c3cc4n(c3)ccs4
68544052	392.503	3	9.67	-16.45	2	6	65	0	6	C[C@H]1Cc2ccccc2N1CCNC(=O)Nc3cccc(c3)CN4CCCC4=O
57153349	398.413	2.33	7.59	-14.63	2	6	78	0	4	c1ccc2c(c1)[nH]c(n2)[C@@H]3CCCN(C3)C(=O)CNC(=O)c4cc(cc(c4)F)F
23478442	394.397	2.44	6.11	-16.31	2	6	78	0	4	Cc1cc([nH]c(=O)c1C(=O)N[C@H]2CCCN(C2)c3ccc(cn3)C(F)(F)F)C
68306970	395.503	2.29	6.07	-13.26	2	6	74	0	5	C[C@H]1CN(CCO1)Cc2cccc(c2)CNC(=O)c3cc4c([nH]c3=O)CCCC4
44454336	406.939	1.9	4.99	-16.45	2	6	65	0	6	c1cc(ccc1CNC(=O)NCCN2CCN(CC2)C(=O)c3ccsc3)Cl
41341022	390.415	2.05	7.1	-25.81	2	6	76	0	6	Cn1cccc1c2csc(n2)NC(=O)CCNC(=O)c3ccc(cc3F)F
70761352	392.43	2.64	7.46	-15.26	2	5	70	0	5	c1ccc2c(c1)cccc2[C@H](CNC(=O)[C@@H]3CC(=O)N(C3)c4ccc(cc4)F)O
68841477	390.487	2.13	5.58	-12.56	2	6	66	0	6	c1cc2cccnc2c(c1)CNC(=O)NCc3cccc(c3)CN4CCOCC4
65992422	399.878	2.71	7.57	-16.25	2	6	79	0	6	C[C@H](c1ccc(cc1)N2CCCC2=O)NC(=O)CNC(=O)c3cccc(c3)Cl
69107622	399.466	2.97	6.63	-14.22	2	6	63	0	5	COc1cccc(c1)N2CC[C@@H](C2)CNC(=O)N[C@@H]3CCOc4c3cc(cc4)F
67646252	394.45	2.91	9.23	-15.35	2	6	68	0	5	Cc1nccn1c2ccc(cc2F)CNC(=O)NC[C@@H]3Cc4ccccc4OC3
31294398	392.377	2.12	6.24	-20.46	2	5	70	0	5	Cc1ccc(c(c1)F)N2C[C@@H](CC2=O)C(=O)NC[C@@H](c3ccc(c(c3)F)F)O
69395083	396.535	2.96	6.7	-11.61	2	6	70	0	6	C[C@H]1CN(CCO1)Cc2cccc(c2)CNC(=O)c3c[nH]nc3C4CCCCC4
38739768	393.44	2.65	6.66	-17.48	2	5	71	0	6	c1cc(c(cc1F)F)CNC(=O)Cc2csc(n2)NC(=O)c3ccsc3
31567578	390.386	1.63	4.94	-20.57	2	6	79	0	6	COc1ccc(cc1)[C@@H](CNC(=O)[C@@H]2CC(=O)N(C2)c3ccc(cc3F)F)O
70836314	395.228	2.48	3.4	-12.45	3	5	78	0	6	c1cc(cc(c1)F)[C@@H](CNC(=O)CNC(=O)c2cccc(c2)Br)O
67809265	391.471	1.67	5.8	-12	2	6	74	0	5	C[C@@H]1CN(CCO1)Cc2cccc(c2)CNC(=O)c3cc4ccccc4[nH]c3=O
59322543	390.892	2.97	6.34	-24.01	2	5	79	0	6	Cc1ccc(cc1)S(=O)(=O)CC(=O)NCCc2c[nH]c3c2cc(cc3)Cl
38367322	394.45	2.82	7.35	-22.31	2	6	68	0	5	c1ccc2c(c1)c(c[nH]2)CC(=O)N3CCN(CC3)CC(=O)Nc4cccc(c4)F
32070131	390.237	2.36	5.43	-19.26	2	6	76	0	5	Cn1cc(c2c1cccc2)C(=O)NCCNC(=O)c3ccc(o3)Br
60488276	391.471	1.92	8.15	-16.72	2	6	79	0	6	c1cc(ccc1C(=O)NCC(=O)NCc2ccc3c(c2)CCC3)N4CCCC4=O
63110143	395.463	1.65	8.43	-21.93	2	6	76	0	5	Cc1nccn1c2ccc(cc2F)CNC(=O)c3cc(c[nH]3)c4csc(n4)C
55351565	393.487	2.63	8.35	-13.79	2	6	79	0	6	Cc1cc(cc(c1)N2CC[C@H](C2=O)C(=O)N[C@@H](C)C(=O)NCc3ccccc3)C
12995644	395.242	2.93	5.3	-11.73	2	6	77	0	5	c1cc2c(cc1CNC(=O)CNC(=O)c3ccc(cc3Cl)Cl)OCCO2
71983335	399.466	2.43	7.09	-14.13	2	6	71	0	6	C[C@H]1CN(C[C@@H](O1)C)C(=O)CNc2ccc(cc2)C(=O)NCc3ccccc3F
65478365	392.503	2.85	9.32	-16.18	2	6	65	0	6	c1cc(cc(c1)N2CCCC2)NC(=O)NCc3ccc(cc3)CN4CCCC4=O
68662228	394.5	1.85	7.84	-21.82	2	6	78	0	5	Cc1nc(cs1)c2cc([nH]c2)C(=O)N[C@H](C)c3ccc(cc3)N4CCCC4=O
68713648	399.878	2.69	7.57	-16.6	2	6	79	0	6	C[C@@H](c1cccc(c1)N2CCCC2=O)NC(=O)CNC(=O)c3cccc(c3)Cl
59322274	391.471	2.94	8.34	-18.06	2	6	74	0	6	Cc1ccc2c(c1)c(c[nH]2)CCNC(=O)[C@@H]3CC(=O)N(C3)c4ccc(cc4)OC
23327246	395.503	2.17	7.51	-20.73	2	6	79	0	6	CC(C)C(=O)NCCNC(=O)C1CCN(CC1)C(=O)c2cccc3c2cccc3
48196866	393.487	2.54	7.69	-17.71	2	6	71	0	5	c1ccc2c(c1)C[C@H](CO2)CNC(=O)NCc3cccc(c3)C(=O)N4CCCC4
69459263	396.365	2	3.12	-14.24	3	6	80	0	6	c1cc(c(cc1OC[C@H](CNC(=O)N[C@H]2CCOc3c2cc(cc3)F)O)F)F
68077852	396.34	1.83	5.45	-14.61	2	5	70	0	5	c1cc(c(cc1F)F)[C@@H](CNC(=O)[C@@H]2CC(=O)N(C2)c3cc(cc(c3)F)F)O
53500737	399.878	2.87	7.33	-18.35	2	6	79	0	6	Cc1ccc(cc1)N2CC[C@H](C2=O)C(=O)NCCNC(=O)c3ccccc3Cl
65031418	397.548	2.91	6.96	-12.21	2	6	64	0	4	Cc1c([nH]c2c1cc(cc2)CNC(=O)N3CCN(CC3)Cc4csc(n4)C)C
48196942	395.503	2.83	8.09	-15.42	2	6	71	0	6	CC(C)N(C)C(=O)c1ccc(cc1)CNC(=O)NC[C@@H]2Cc3ccccc3OC2
42523716	394.349	2.78	5.42	-11.43	2	6	77	0	6	c1ccc2c(c1)OC[C@@H](O2)CNC(=O)CNC(=O)c3ccc(cc3)C(F)(F)F
69067194	397.45	1.61	7.42	-17.15	2	6	71	0	5	c1cc(cc(c1)CN2CCCC2=O)CNC(=O)N[C@@H]3CCOc4c3cc(cc4)F
70046141	398.532	2.21	7.63	-17.86	2	6	74	0	5	CC1CCN(CC1)C(=O)c2ccc(cc2)NC(=O)NCc3csc(n3)C4CC4
66908567	390.487	3	7.15	-15.65	3	6	79	0	6	c1ccc(cc1)n2cc(cn2)CCNC(=O)NC[C@@]3(CCCc4c3cccc4)O
22384504	395.184	2.72	4.86	-23.17	2	6	77	0	4	c1cc2c(cc1NC(=O)COc3ccc(cc3F)Br)NC(=O)CO2
55896575	399.394	2.92	4.32	-21.95	2	6	79	0	5	c1cc(c(cc1N2CCCS2(=O)=O)NCC(=O)Nc3ccc(cc3F)F)F
50004584	392.377	2.07	6.03	-12.79	2	5	70	0	6	c1ccc(c(c1)CNC(=O)[C@@H]2CC(=O)N(C2)c3cccc(c3)C(F)(F)F)CO
53807925	390.386	2.1	4.77	-17.12	2	6	79	0	6	COc1ccc(cc1)[C@@H](CNC(=O)[C@@H]2CCN(C2=O)c3ccc(c(c3)F)F)O
70832622	393.34	2.94	6.54	-13.68	2	5	67	0	6	c1cc(cc(c1)F)[C@H](CNC(=O)c2ccc(cc2)n3ccc(n3)C(F)(F)F)O
67159301	397.5	1.77	6.89	-12.81	2	6	79	0	5	c1cc2c(cc1C(=O)NCC(=O)NCC(=O)N3CCc4c(ccs4)C3)CCC2
45973833	394.5	2.31	7.19	-21.68	2	6	74	0	4	Cc1nc2ccc(cc2s1)NC(=O)NCc3cccc(c3)C(=O)N4CCCC4
63333849	399.878	2.6	8.4	-15.66	2	6	79	0	6	CC(=O)Nc1cc(ccc1Cl)NC(=O)[C@@H]2CC(=O)N(C2)CCc3ccccc3
67032241	394.88	2.31	5.25	-17.16	2	6	77	0	6	CC(=O)NCc1ccc(s1)C(=O)NCCc2cc3c(c(c2)Cl)OCCO3
72001152	407.289	3	5.9	-12.29	2	5	67	0	5	c1cc(cc(c1)Br)OCCNC(=O)c2ccc3c(c2)NC(=O)CS3
67932046	393.487	2.96	8.58	-17.59	2	6	71	0	5	C[C@H]1Cc2ccccc2N1C(=O)NCc3cccc(c3)C(=O)NC[C@H]4CCCO4
47898823	411.889	2.42	8.16	-21.72	2	6	79	0	4	CNC(=O)c1cc(ccc1Cl)NC(=O)[C@@H]2CC(=O)N(C2)c3ccc4c(c3)CCC4
63722787	396.874	2.98	8.54	-17.51	2	5	71	0	6	Cc1cccc(c1)Cn2cccc(c2=O)C(=O)NC[C@@H](c3ccc(cc3)Cl)O
63461525	390.358	2.77	4.37	-15.29	2	5	75	0	6	CS(=O)(=O)c1ccc(c(c1)NCC(=O)Nc2ccccc2C(F)(F)F)F
94032635	392.503	2.15	8.42	-14.83	2	6	74	0	6	CN(CCc1ccccn1)C(=O)CNC(=O)N[C@@H]2C[C@@H]3CCCc4c3c2ccc4
66189662	390.434	2.79	5.12	-14.1	2	6	66	0	6	Cc1ccc(c(n1)OC)CNC(=O)NC[C@@H]2CCN(C2)c3ccc(c(c3)F)F
6225843	397.298	2.72	5.79	-17.24	2	6	80	0	6	c1cc(ccc1c2nc([nH]n2)SCC(=O)NC[C@H]3CCCO3)Br
47040735	390.237	2.85	6.34	-18.15	2	6	71	0	5	c1cc(cc(c1)N2CCNC2=O)NC(=O)COc3ccc(cc3)Br
21187043	406.408	2.2	4.56	-17.78	3	6	79	0	5	c1cc(cc(c1)N2CCN(CC2)C(=O)c3ccc(cc3)CNC(=O)N)C(F)(F)F
70963659	392.377	2.21	6.25	-15.93	2	5	70	0	6	c1ccc(cc1)N2C[C@@H](CC2=O)C(=O)NC[C@@H](c3ccc(cc3)C(F)(F)F)O
67933271	394.471	2.4	6.56	-14.11	2	6	77	0	6	c1ccc2c(c1)C[C@@H](CO2)C(=O)NCc3cccc(c3)C(=O)NC[C@@H]4CCCO4
64798633	399.878	2.91	7.34	-16.07	2	6	79	0	6	Cc1ccc(cc1)N2CC[C@H](C2=O)C(=O)NCCNC(=O)c3ccc(cc3)Cl
50050489	392.175	2.61	4.01	-16.09	3	5	70	0	6	C#CCNC(=O)CCNC(=O)Nc1ccc(c(c1)C(F)(F)F)Br
57481402	390.358	2.56	3.84	-18.15	2	5	75	0	6	CNC(=O)c1cccc(c1)CNS(=O)(=O)c2ccc(c(c2)C(F)(F)F)F
53282536	391.449	2.91	5.03	-15.65	2	6	76	0	6	c1cc(cc(c1)F)OC[C@H](CNC(=O)c2cc3c(s2)nc4n3ccs4)O
68125660	397.269	2.66	4.81	-10.82	2	6	77	0	5	C[C@@H](C(=O)NCc1cc2c(c(c1)Br)OCO2)NC(=O)C3CCCC3
70832618	393.34	2.94	6.47	-13.76	2	5	67	0	6	c1cc(cc(c1)F)[C@@H](CNC(=O)c2ccc(cc2)n3ccc(n3)C(F)(F)F)O
44174326	393.44	2.96	6.71	-16.02	2	5	71	0	6	c1cc(sc1)C(=O)Nc2nc(cs2)CC(=O)NCc3ccc(cc3F)F
32100266	416.275	2.46	6.55	-18.09	2	6	79	0	5	c1ccc(cc1)N2C[C@H](CC2=O)C(=O)NCC(=O)Nc3cccc(c3)Br
32738350	416.403	2.93	8.23	-14.35	2	6	78	0	5	C[C@H](c1[nH]c2ccccc2n1)NC(=O)[C@H]3CC(=O)N(C3)c4cccc(c4)C(F)(F)F
68481843	397.233	2.98	5.98	-10.96	2	5	67	0	4	c1cc(c(cc1C(=O)NCC(=O)N[C@@H]2CCOc3c2cc(cc3)F)Cl)Cl
67148857	392.499	2.49	8.22	-11.45	2	5	70	0	5	c1ccc(cc1)[C@@H](C2CCN(CC2)C(=O)CNC(=O)c3ccc4c(c3)CCC4)O
68433554	392.434	2.43	8.53	-15.4	2	6	76	0	6	Cn1cc(cn1)[C@H]2C[C@@H]2C(=O)NCc3cccc(c3)NC(=O)c4ccc(cc4)F
66925301	390.487	2.97	6.82	-12.08	3	6	79	0	6	c1ccc2c(c1)CCC[C@@]2(CNC(=O)NCc3cccc(c3)Cn4cccn4)O
66194561	418.291	2.56	5.54	-14.2	2	6	71	0	5	c1cc(cc(c1)NC(=O)CNc2ccc(cc2)Br)C(=O)N3CCOCC3
55896644	399.394	2.92	4.32	-23.78	2	6	79	0	5	c1cc(c(cc1N2CCCS2(=O)=O)NCC(=O)Nc3cc(ccc3F)F)F
68909369	398.528	2.81	7.47	-23.81	2	5	75	0	6	C[S@@](=O)c1ccc(cc1)C(=O)NCc2cccc(c2)NC(=O)C3CCCCC3
66136802	392.569	2.64	7.12	-11.74	2	6	74	0	6	C[C@H]1CCCCN1C(=O)[C@H](C)NC(=O)NCCCc2nc3c(s2)CCCC3
12446169	398.482	2.59	8.75	-15.74	2	6	78	0	6	c1ccc(c(c1)CNC(=O)CC[C@H]2CCCN(C2)C(=O)c3c4c([nH]n3)CCC4)F
53807875	390.386	1.63	4.68	-15.07	2	6	79	0	6	COc1ccc(cc1)[C@H](CNC(=O)[C@@H]2CC(=O)N(C2)c3cc(cc(c3)F)F)O
41944152	398.301	2.13	2.68	-11.13	2	6	71	0	6	C[C@@H]1CN(C[C@@H](O1)C)CCNC(=O)CNC(=O)c2cccc(c2)Br
66158594	398.532	2.74	8.97	-16.89	2	6	74	0	6	c1ccc(c(c1)NC(=O)NCCCc2nc3c(s2)CCCC3)N4CCCC4=O
25696441	391.221	2.88	4.66	-13.07	2	6	77	0	5	c1cc(cc(c1)Br)OCCC(=O)Nc2ccc3c(c2)NC(=O)CO3
67645865	390.365	1.85	6.52	-17.57	3	6	79	0	6	c1cc(c(cc1CNC(=O)NC[C@@H](c2ccc(c(c2)F)F)O)F)n3ccnc3
67151606	399.878	2.73	8.24	-18.88	2	6	79	0	6	CN(CC(=O)Nc1cccc(c1)Cl)C(=O)CNC(=O)c2ccc3c(c2)CCC3
17860127	394.452	2.8	6.78	-20.85	2	6	77	0	5	c1cc(cc(c1)NC(=O)c2cccs2)C(=O)NCc3ccc4c(c3)OCCO4
12908191	405.426	2.41	6.56	-17.03	2	6	79	0	6	c1ccc2c(c1)N(C(=O)CS2)CCC(=O)NCC(=O)Nc3ccc(c(c3)F)F
67356826	393.481	2.59	4.05	-21.93	2	6	79	0	6	CS(=O)(=O)N1CCC(CC1)CNC(=O)Nc2cccc(c2)SC(F)F
68109060	390.896	2.67	5	-13.47	2	6	70	0	5	c1cc2c(cc1Cl)[nH]cc2CC(=O)Nc3nc(cs3)CN4CCOCC4
67158721	390.487	2.92	8.78	-15.62	2	6	78	0	4	Cc1cccc(c1)C(=O)NCC(=O)N2CCC[C@H](C2)c3[nH]c4cc(ccc4n3)C
68167862	392.377	1.99	6.58	-17.12	2	5	67	0	6	c1cc(c(cc1F)F)C(=O)NCCCC(=O)N[C@@H]2CCOc3c2cc(cc3)F
66158418	391.444	2.77	5.81	-17.56	2	6	80	0	6	C1CCc2c(nc(s2)CCCNC(=O)Nc3nnc(s3)C(F)(F)F)C1
66339727	390.867	2.66	4.11	-12.06	3	6	80	0	6	Cc1cccc(c1)OC[C@@H](CNC(=O)N[C@@H]2CCOc3c2cccc3Cl)O
90746278	401.894	2.1	6.09	-14.16	2	6	73	0	6	CN(C)c1ccc(cc1)[C@@H](CNC(=O)[C@@H]2CC(=O)N(C2)c3ccc(cc3)Cl)O
68928861	393.459	2.95	6.69	-14.06	2	5	61	0	6	C[C@H](C(=O)NC[C@@H]1CCN(C1)c2ccc(c(c2)F)F)NC(=O)c3cccs3
67806940	396.274	2.69	7.12	-15.05	2	6	72	0	5	Cn1c(cc(c1Cl)Cl)C(=O)NCc2cccc(c2)NC(=O)[C@H]3CCCO3
66342044	396.314	2.89	6.37	-18.91	2	6	70	0	4	Cc1nnc(s1)NC(=O)NC[C@@H]2CCN(C2)c3cccc(c3)Br
50337608	398.466	2.69	9.7	-18.87	2	6	76	0	6	Cc1cn(c2c1cccc2)CC(=O)NCc3cccc(c3)NC(=O)c4ccncc4
56715977	391.418	2.71	4.48	-11.01	2	6	63	0	6	COc1c(cc(cc1F)NC(=O)NCc2cccc(c2)CN3CCOCC3)F
70823545	391.2	2.74	7.24	-11.81	2	6	80	0	5	c1cc(ccc1Oc2ccc(cc2F)C(=O)NCc3nc[nH]n3)Br
67465555	390.386	2.06	5.86	-11.14	2	6	77	0	6	CC[C@H](c1ccc2c(c1)OCCO2)NC(=O)CNC(=O)c3cc(cc(c3)F)F
92616418	391.487	2.4	7.39	-12.25	2	6	71	0	6	c1cc(ccc1COC2CCN(CC2)C(=O)CNC(=O)NC3CCCCC3)F
66638841	390.365	1.9	4.84	-15.83	2	6	80	0	6	Cn1cc(cn1)c2cc(cnc2)C(=O)NC[C@@H](c3cccc(c3)C(F)(F)F)O
61019824	390.281	2.9	5.54	-15.7	3	5	70	0	6	CNC(=O)c1ccc(cc1)CNC(=O)NCCc2ccccc2Br
12519889	392.484	2.75	9.02	-17.55	2	6	78	0	5	CC(=O)N1CCc2c1ccc(c2)NC(=O)CSc3[nH]cc(n3)c4ccccc4
60750519	399.497	2.87	6.65	-18.51	2	6	80	0	6	c1ccc2c(c1)-c3c(sc(n3)NC(=O)CCCNC(=O)c4ccsc4)CO2
67645866	390.365	1.85	6.43	-17.44	3	6	79	0	6	c1cc(c(cc1CNC(=O)NC[C@H](c2ccc(c(c2)F)F)O)F)n3ccnc3
69059048	391.83	2.2	4.64	-14.91	3	6	79	0	5	c1cc(ccc1C(=O)NCCNC(=O)N[C@H]2CCOc3c2cc(cc3)F)Cl
67607363	395.503	2.06	4.09	-11.42	3	6	74	0	5	C[C@H]1CN(CCO1)Cc2cccc(c2)CNC(=O)N[C@@H]3c4ccccc4C[C@@H]3O
79356286	395.415	2.86	8.07	-18.17	2	6	76	0	4	c1cc2c(cc1c3csc(n3)NC(=O)Cc4c[nH]c5c4cc(cc5)F)OCO2
68481588	391.83	2.39	4.9	-12.14	3	6	79	0	5	c1cc(ccc1CNC(=O)NCC(=O)N[C@H]2CCOc3c2cc(cc3)F)Cl
69085312	399.466	2.61	6.48	-12.77	2	6	63	0	4	C[C@@H](c1ccc(cc1)N2CCOCC2)NC(=O)N[C@@H]3CCOc4c3cc(cc4)F
32711035	392.434	2.99	8.35	-18.54	2	6	78	0	4	c1ccc(cc1)c2cc([nH]n2)C(=O)N3CCC(CC3)NC(=O)c4ccccc4F
12938666	394.349	2.54	5.28	-11.7	2	6	77	0	6	c1cc(ccc1C(=O)NCC(=O)NCc2ccc3c(c2)OCCO3)C(F)(F)F
68647578	394.471	2.94	7.58	-14.35	2	6	77	0	6	c1ccc2c(c1)OC[C@H](O2)CNC(=O)c3ccc(cc3)CNC(=O)C4CCCC4
52308733	396.878	2.94	7.47	-19.25	2	6	76	0	6	Cc1ccc(cc1)CNC(=O)c2cccc(c2)CNc3cnn(c(=O)c3Cl)C
14990416	411.527	2.56	5.89	-15.21	2	6	74	0	5	C[C@@H]1CN(C[C@@H](O1)C)Cc2ccc(c(=O)[nH]2)C(=O)NCc3cc4ccccc4s3
78920193	401.894	2.64	6.29	-15.76	2	6	71	0	6	Cc1cccc(c1)CNC(=O)CNc2ccc(c(c2)Cl)C(=O)N3CCOCC3
68431641	392.434	2.77	9.15	-15.2	2	6	76	0	6	Cn1cc(cn1)[C@@H]2C[C@H]2C(=O)Nc3ccc(c(c3)NC(=O)Cc4ccccc4)F
63780652	399.45	2.4	9.9	-25.94	2	6	80	0	6	Cc1cccc(c1)Cn2cccc(c2=O)C(=O)NCC(=O)Nc3cccc(c3)C#C
68165980	391.402	1.81	6.82	-18.08	2	6	80	0	4	c1ccnc(c1)C(=O)Nc2ccc(cc2)C(=O)N[C@H]3CCOc4c3cc(cc4)F
67703087	394.466	2.95	7.21	-16.94	2	6	65	0	5	CC(=O)NC[C@@H]1CCCN(C1)C(=O)NC[C@H]2CCN(C2)c3ccc(c(c3)F)F
49511120	392.484	2.87	8.5	-16.9	2	6	78	0	4	c1cc(sc1)c2cc([nH]n2)C(=O)Nc3ccc4c(c3)CN(CC4)C(=O)C5CC5
70813995	391.899	2.45	7.4	-16.92	2	6	79	0	6	Cc1ccc(cc1N2C[C@@H](CC2=O)C(=O)NCCNC(=O)C3CCCC3)Cl
47972134	394.5	2.8	8.32	-17.98	2	6	76	0	5	c1ccc(cc1)n2c3ccccc3nc2SCC(=O)N[C@H]4CCCCNC4=O
64395620	394.862	2.58	8.47	-16.84	2	6	76	0	6	c1ccc(c(c1)n2cc(cn2)C(=O)NCc3ccc(cc3)C(=O)NC4CC4)Cl
32074664	391.471	2.71	8.79	-26.69	2	6	78	0	6	c1ccc(cc1)COc2ccc3c(c2)ccn3CC(=O)N4CCC(CC4)C(=O)N
46759594	399.878	1.93	7.58	-16.86	2	6	79	0	6	C[C@H](C(=O)NCc1cccc(c1)N2CCCC2=O)NC(=O)c3ccccc3Cl
67938171	393.237	2.74	6.49	-26.05	2	6	80	0	4	CC1(Cc2cccc(c2O1)OCC(=O)Nc3cc(c[nH]c3=O)Br)C
78779025	394.45	2.73	8.29	-24.3	2	6	76	0	6	Cn1c2cc(ccc2nc1CCNC(=O)CC[C@H]3Cc4ccccc4NC3=O)F
44036767	406.404	2.26	7.11	-20.33	2	5	70	0	5	c1cc(cc(c1)C(F)(F)F)C(=O)Nc2ccc(cc2)CC(=O)N3CCC(CC3)O
12883055	397.45	2.64	6.1	-23.74	2	6	71	0	6	c1cc(cc(c1)NC(=O)CN2CCO[C@@H](C2)c3ccc(cc3)F)C(=O)NC4CC4
62647254	392.477	2.01	5.38	-18.39	2	5	75	0	6	c1ccc(cc1)S(=O)(=O)CCNC(=O)NCc2cc3cc(ccc3s2)F
64859509	394.519	2.97	9.84	-17.38	2	6	74	0	6	Cc1cccc(n1)NC(=O)[C@H]2CCCN(C2)C(=O)CCNc3cc(cc(c3)C)C
12927130	410.804	2.85	6.34	-22.37	2	6	77	0	5	c1cc(c(cc1F)F)C(=O)NCCC(=O)Nc2cc3c(cc2Cl)OCCCO3
68481582	391.83	2.39	4.9	-12.13	3	6	79	0	5	c1cc(ccc1CNC(=O)NCC(=O)N[C@@H]2CCOc3c2cc(cc3)F)Cl
48364206	399.878	2.23	6.59	-16.15	2	6	79	0	6	c1cc(cc(c1)Cl)CCC(=O)NCc2ccc(cc2)C(=O)N3CCNC(=O)C3
68306969	395.503	2.29	6.08	-12.92	2	6	74	0	5	C[C@@H]1CN(CCO1)Cc2cccc(c2)CNC(=O)c3cc4c([nH]c3=O)CCCC4
65897126	391.471	2.37	9.29	-20.02	2	6	72	0	6	Cn1cc(c2c1cccc2)CC(=O)NCc3cccc(c3)NC(=O)[C@@H]4CCCO4
31810867	393.44	2.75	6.83	-27.76	2	5	71	0	6	c1cc(c(c(c1)F)c2csc(n2)NC(=O)CCNC(=O)c3ccsc3)F
65597857	396.516	2.44	6.7	-18.88	2	6	70	0	5	Cc1nc(cs1)c2cc([nH]c2)C(=O)N[C@H](C)c3ccc(cc3)N4CCOCC4
67682157	390.358	2.7	4.48	-17.14	2	5	75	0	5	CS(=O)(=O)c1ccc(cc1)CNC(=O)Nc2ccc(c(c2)C(F)(F)F)F
68078068	396.34	2.29	5.63	-12.65	2	5	70	0	5	c1cc(c(cc1N2CC[C@H](C2=O)C(=O)NC[C@@H](c3ccc(cc3F)F)O)F)F
49421022	414.307	2.94	5.3	-9.63	2	6	68	0	4	c1cc(c(cc1Br)CN2CCN(CC2)c3cc(n[nH]3)c4ccncc4)O
67932061	393.487	2.88	8	-15.75	2	6	71	0	5	c1ccc2c(c1)CCN(C2)C(=O)NCc3cccc(c3)C(=O)NC[C@H]4CCCO4
13944812	399.853	2.77	9.49	-15.63	2	5	65	0	5	c1cc(ccc1NC(=O)[C@H]2CC(=O)N(C2)CCc3c[nH]c4c3cc(cc4)F)Cl
67174560	397.328	2.16	6.08	-15.57	2	6	79	0	6	CN(CC(=O)Nc1cc(cc(c1)F)F)C(=O)CNC(=O)c2cc(cc(c2)F)F
95465549	418.946	2.04	7.5	-21.08	2	5	70	0	6	c1ccc(c(c1)SCCC(=O)Nc2cccc(c2)C(=O)N3CCC(CC3)O)Cl
64050782	396.516	2.81	5.9	-15.22	2	6	70	0	4	c1cc2c(cc1NC(=O)c3csc4c3CCCC4)[nH]c(n2)CN5CCOCC5
60498842	390.358	2.71	4	-13.65	2	5	75	0	6	Cc1ccc(cc1F)C(=O)NCCNS(=O)(=O)c2c(cc(cc2F)F)F
60403622	391.349	2.01	6.36	-13.81	2	6	79	0	5	c1cc(c(cc1C(=O)NCC(=O)Nc2cc(ccc2F)N3CCCC3=O)F)F
23423317	393.487	2.73	8.42	-23.8	2	6	79	0	6	Cc1ccccc1C(=O)NCCC(=O)N2CCC[C@H](C2)C(=O)Nc3ccccc3
65992353	399.878	2.66	7.57	-17.33	2	6	79	0	6	C[C@@H](c1cccc(c1)N2CCCC2=O)NC(=O)CNC(=O)c3ccccc3Cl
41944155	398.301	2.13	2.98	-10.91	2	6	71	0	6	C[C@H]1CN(C[C@@H](O1)C)CCNC(=O)CNC(=O)c2cccc(c2)Br
64437100	395.434	1.91	7.71	-24.03	2	6	79	0	4	CNC(=O)c1cc(ccc1F)NC(=O)[C@@H]2CC(=O)N(C2)c3ccc4c(c3)CCC4
58587315	391.237	2.85	3.46	-12.13	3	4	61	0	5	c1cc(c(cc1[C@H](CNC(=O)NCc2c(ccs2)Br)O)F)F
67243440	391.269	2.19	7.32	-19.79	2	6	76	0	6	CCNC(=O)Cn1ccc(n1)NC(=O)[C@@H]2C[C@H]2c3ccc(cc3)Br
68077767	398.409	2.56	8.14	-18.73	2	5	71	0	6	Cc1cccc(c1)Cn2cccc(c2=O)C(=O)NC[C@@H](c3ccc(cc3F)F)O
53502554	396.878	2.96	7.74	-18.37	2	6	66	0	5	c1cc(ccc1CNC(=O)Cn2ccc3c2cc(cc3)Cl)N4CCNC(=O)C4
48158157	392.232	2.79	7.72	-20.48	2	6	71	0	5	c1ccn2c(c1)nnc2CCNC(=O)NCc3cc(ccc3F)Br
77909420	396.516	1.91	7.83	-16.1	2	6	76	0	6	c1ccnc(c1)CNC(=O)C2CCC(CC2)CNC(=O)c3cc4n(c3)ccs4
63796854	390.281	2.9	5.73	-13.66	3	5	70	0	6	CCNC(=O)c1ccc(cc1)CNC(=O)NCc2cccc(c2)Br
8287703	401.257	3	4.21	-14.57	2	5	75	0	6	c1cc(cc(c1)F)NC(=O)CCNS(=O)(=O)c2cccc(c2)Br
57890961	395.431	2.5	5.1	-17.95	2	6	79	0	6	c1ccc2c(c1)CCN2S(=O)(=O)CCNC(=O)NCc3cc(cc(c3)F)F
67107729	392.427	2.5	6	-19.17	2	5	75	0	6	c1cc(cc(c1)F)[C@H]2C[C@@H]2NC(=O)c3ccc(c(c3)S(=O)(=O)NC4CC4)F
66928502	399.535	2.86	8.18	-14.48	2	6	79	0	6	Cc1ccc(cc1C)C(=O)NCC(=O)N2CCC(CC2)NC(=O)CC3CCCC3
67062180	395.484	2.66	6.77	-13.2	2	6	72	0	5	c1ccc(cc1)c2csc(n2)CNC(=O)NCc3ccc4c(c3)OCCCO4
64405912	395.503	2.67	7.62	-15.66	2	6	79	0	6	CC(C)CNC(=O)CNC(=O)[C@H]1CCCN(C1)C(=O)c2cccc3c2cccc3
56322634	392.434	2.93	9.52	-11.02	2	6	76	0	6	C[C@@H]1C[C@@H]1C(=O)Nc2ccc(cc2C(=O)NCc3cnn(c3)c4ccccc4)F
77953058	394.452	2.84	6.02	-17.19	2	6	77	0	6	c1ccc(cc1)CNC(=O)c2ccc(cc2)CNC(=O)c3c4c(cs3)OCO4
68380952	394.275	2.37	5.8	-25.15	2	6	76	0	6	CC(=O)Nc1ccc(cc1NC(=O)Cn2ccc(n2)C(F)(F)F)C(F)(F)F
66359945	397.475	2.48	7.59	-13.99	3	5	70	0	6	c1cc(ccc1CNC(=O)NCc2cc3cc(ccc3s2)F)C(=O)NC4CC4
66428505	395.257	2.98	6.92	-14.44	2	5	71	0	5	c1cc(sc1)c2nc([nH]n2)CNC(=O)Cc3ccc(c(c3)Br)F
65620048	397.244	2.83	6.15	-11.27	2	5	71	0	6	Cc1cc(c(o1)C)C(=O)NCC(=O)NCCc2cc(ccc2F)Br
77099771	395.381	2.63	6.89	-20.76	2	6	75	0	5	c1cc(cc(c1)NC(=O)NCC2CCN(CC2)C(=O)c3ccoc3)C(F)(F)F
47957181	394.5	2.06	6.53	-18.29	2	6	74	0	5	c1ccc2c(c1)nc(s2)CNC(=O)NCc3cccc(c3)C(=O)N4CCCC4
32458795	391.471	1.74	7.89	-25	2	6	79	0	6	c1ccc(cc1)C(=O)NCCNC(=O)[C@H]2CC(=O)N(C2)c3ccc4c(c3)CCC4
67156126	394.471	2.22	7.64	-12.57	2	6	77	0	6	CC[C@H](c1ccc2c(c1)OCCO2)NC(=O)CNC(=O)c3ccc4c(c3)CCC4
65765215	391.221	2.65	4.12	-13.61	2	6	77	0	5	c1cc(ccc1OCCNC(=O)c2ccc3c(c2)NC(=O)CO3)Br
66931131	391.471	2.75	7.49	-14.82	2	6	76	0	6	Cn1ccnc1COc2ccc(cc2)C(=O)NC[C@]3(CCCc4c3cccc4)O
94055883	393.487	2.78	6.15	-12.11	2	6	72	0	5	c1cc2c3c(c1)[C@@H](C[C@H]3CCC2)NC(=O)NCc4ccnc(c4)O[C@@H]5CCOC5
67496174	399.878	2.81	8.62	-18.09	2	6	79	0	6	c1ccc(cc1)CC(=O)N2CCC[C@@H]2C(=O)NCC(=O)Nc3ccc(cc3)Cl
63306339	395.503	2.51	7.81	-12.91	2	6	71	0	5	Cc1cccc(c1)CNC(=O)NCc2ccc(cc2)C(=O)N3C[C@H](O[C@@H](C3)C)C
66599762	392.301	2.86	8.39	-14.54	2	6	72	0	6	C[C@@H](c1nnc2n1CCC2)NC(=O)NCCCc3cccc(c3)Br
62290403	391.471	2.96	9.22	-16.52	2	6	72	0	6	CCn1c2ccccc2cc1C(=O)NCc3cccc(c3)NC(=O)[C@H]4CCCO4
53463323	398.482	2.48	6.25	-18.48	2	6	65	0	6	Cc1cccc(c1)N2CCN(CC2)CCNC(=O)c3cc(ccc3F)NC(=O)C
66676724	399.535	2.51	7.93	-20.15	2	6	79	0	6	Cc1ccc(cc1)C(=O)N2CCC(CC2)NC(=O)CCNC(=O)C3CCCCC3
3467734	405.735	2.54	1.08	-18.46	2	6	80	0	6	c1cc(ccc1NC(=O)CNC(=O)Cn2cc(cc(c2=O)Cl)C(F)(F)F)F
69109903	398.36	2.19	4.65	-14.63	3	6	75	0	6	c1cc2c(cc1F)[C@@H](CCO2)NC(=O)NCCNc3ccc(cn3)C(F)(F)F
55861849	418.291	2.56	5.54	-15.56	2	6	71	0	5	c1cc(cc(c1)NCC(=O)Nc2ccc(cc2)Br)C(=O)N3CCOCC3
57672846	390.386	2.23	5.89	-24.49	2	6	77	0	6	C[C@@H](c1ccc2c(c1)OCCO2)NC(=O)CCNC(=O)c3ccc(cc3F)F
93292629	399.466	2.49	8.61	-16.04	2	6	71	0	6	CC(=O)Nc1cccc(c1)CNC(=O)N2CCC(CC2)OCc3ccccc3F
77953734	390.487	2.83	8.91	-17.12	2	6	76	0	6	c1ccc(cc1)CNC(=O)C2CCC(CC2)CNC(=O)c3cc4cccnn4c3
66824304	391.468	2.7	6.93	-15.76	2	6	80	0	6	C[C@@H](C(=O)Nc1ncc(s1)Cc2cccc(c2)F)NC(=O)C3CCOCC3
50611401	391.471	2.64	9.66	-21.9	2	6	72	0	6	Cc1cn(c2c1cccc2)CC(=O)NCc3cccc(c3)NC(=O)[C@H]4CCCO4
67455878	393.915	2.83	6.58	-20.55	2	6	73	0	5	c1cc(ccc1[C@@H](C2CCN(CC2)C(=O)NCCC(=O)N3CCCC3)O)Cl
32074113	400.276	2.98	7.32	-20.95	2	5	63	0	5	Cn1cc(c2c1cccc2)C(=O)NCCNC(=O)c3ccc(cc3)Br
65159815	393.487	2.77	8.64	-15.83	2	6	79	0	6	c1ccc(cc1)CC(=O)NCC(=O)Nc2ccc(cc2)C(=O)N3CCCCCC3
67174567	397.328	2.16	6.07	-17.45	2	6	79	0	6	CN(CC(=O)Nc1cc(cc(c1)F)F)C(=O)CNC(=O)c2ccc(c(c2)F)F
12535838	408.527	2.7	8.49	-14.78	2	6	78	0	5	Cc1ccc(s1)c2cc(n[nH]2)C(=O)NCc3ccc(cc3)C(=O)N4CCCCC4
54096775	394.269	2.52	4.93	-11.2	2	6	76	0	6	Cc1c(c([nH]n1)C(=O)NCc2cccc(c2)OC[C@H]3CCCO3)Br
56078613	392.455	2.81	8.34	-13.47	2	6	80	0	6	c1ccc2c(c1)c(=O)cc([nH]2)C(=O)Nc3cccc(c3)COC[C@@H]4CCCCO4
52750668	398.429	1.93	5.17	-12.4	2	6	70	0	4	c1cc(ccc1CN2CCN(CC2)C(=O)[C@H]3CCCN(C3)C(=O)N)C(F)(F)F
92405554	390.418	2.8	9.72	-17.11	2	6	80	0	5	C[C@H]([C@@H](c1ccc(cc1)F)O)NC(=O)c2ccc(nc2)n3cnc4c3cccc4
54079182	393.468	2.53	7.96	-23.51	2	6	79	0	6	CN(CC(=O)Nc1cccc(c1)NC(=O)c2ccccc2)C(=O)c3ccsc3
67336154	390.361	2.57	7.79	-21.2	2	5	79	0	4	c1cc(cc(c1)C(F)(F)F)[C@@H]2C[C@H]2NC(=O)c3cc4c([nH]c3=O)CCCC4=O
44036755	402.878	2.03	7.12	-20.29	2	6	79	0	6	c1cc(ccc1CC(=O)N2CCC(CC2)O)NC(=O)COc3ccc(cc3)Cl
68194137	394.443	2.81	5.58	-15.13	2	5	75	0	6	C[C@H]1C[C@H](c2c1cccc2)NC(=O)CCNS(=O)(=O)c3ccc(c(c3)F)F
66216839	391.83	2.55	5.51	-16.02	2	6	71	0	5	c1cc(ccc1C(=O)N2CCOCC2)NC(=O)CNc3ccc(c(c3)Cl)F
63301824	396.516	2.48	6.76	-32.17	2	6	78	0	6	c1ccc2c(c1)c(=O)nc([nH]2)CN3CCC(CC3)C(=O)NCCc4cccs4
67933410	392.499	2.74	8.54	-14.5	2	5	67	0	6	c1ccc2c(c1)CCC[C@H]2C(=O)NCc3cccc(c3)C(=O)NC[C@H]4CCCO4
66846405	397.45	2.59	6.08	-20.21	2	6	71	0	6	c1ccc(c(c1)[C@@H]2CN(CCO2)CC(=O)Nc3cccc(c3)C(=O)NC4CC4)F
69423446	395.232	2.22	6.88	-14.24	2	6	78	0	5	c1c(cc(cc1F)Br)c2cc(n[nH]2)NC(=O)CCN3CCCC3=O
77930490	390.487	2.73	9.14	-14.69	2	6	76	0	6	c1ccc(cc1)CNC(=O)C2CCC(CC2)CNC(=O)c3cccc4n3ncc4
65736488	391.196	2.84	6.13	-11.85	2	5	75	0	4	c1cc(oc1)c2ccc(c(=O)[nH]2)C(=O)NCc3cc(cc(c3)Br)F
94055881	393.487	2.78	6.06	-12.03	2	6	72	0	5	c1cc2c3c(c1)[C@@H](C[C@@H]3CCC2)NC(=O)NCc4ccnc(c4)O[C@@H]5CCOC5
12847822	407.27	2.12	5.48	-16.96	2	6	80	0	6	c1cc(=O)n(cc1C(F)(F)F)CC(=O)NCC(=O)Nc2ccc(c(c2F)F)F
12977412	393.487	2.15	8.87	-15.12	2	6	79	0	6	Cc1ccc(cc1)CN2C[C@H](CC2=O)C(=O)NCC(=O)Nc3c(cccc3C)C
66427578	393.266	2.74	6.77	-13.73	2	6	80	0	6	c1cc(cc(c1)Br)OCC(=O)NCc2[nH]nc(n2)c3cccs3
21657256	399.878	2.18	7.7	-24.57	2	6	79	0	6	CC(=O)Nc1cccc(c1)N2C[C@@H](CC2=O)C(=O)NCCc3ccc(cc3)Cl
68033249	391.265	2.64	6.34	-13.38	2	5	71	0	6	c1cc2c(c(c1)Br)CC[C@H]2NC(=O)CCCNC(=O)c3ccco3
66925405	395.503	2.9	5.14	-10.36	3	6	74	0	5	c1ccc2c(c1)CCC[C@@]2(CNC(=O)NCc3ccc(cc3)N4CCOCC4)O
60489124	390.48	2.78	6.2	-13.55	2	5	75	0	6	CC(C)NS(=O)(=O)c1ccc(c(c1)C(=O)NCc2ccc3c(c2)CCC3)F
55941576	393.418	2.44	8.83	-23.71	2	6	80	0	6	C[C@@H](c1ccc(cc1)NC(=O)c2ccc(cc2)F)NC(=O)Cn3ccccc3=O
68480395	396.34	2.59	6.01	-11.54	2	5	67	0	5	c1cc(ccc1C(=O)NCC(=O)N[C@@H]2CCOc3c2cc(cc3)F)C(F)(F)F
68164798	390.842	2.42	6.95	-14.27	2	5	67	0	6	c1cc(ccc1C(=O)NCCCC(=O)N[C@@H]2CCOc3c2cc(cc3)F)Cl
77197161	405.227	2.7	5.14	-10.45	2	6	80	0	5	c1ccc(cc1)[C@@H](Cn2cc(nn2)C(=O)Nc3ccc(cc3F)Br)O
69581609	397.381	2.54	7.89	-17.71	2	6	80	0	6	c1ccn(c(=O)c1)Cc2ccc(cc2)NC(=O)CNC(=O)c3cc(cc(c3)F)F
67054623	395.434	1.6	6.69	-16.1	2	6	79	0	5	c1cc(cc(c1)F)[C@H]2C[C@@H]2C(=O)NCc3ccc(cc3)C(=O)N4CCNC(=O)C4
24276878	391.543	2.6	5.66	-13.35	2	5	71	0	6	Cc1ccc(s1)C(=O)NCC(=O)NCc2ccc(s2)c3csc(n3)C
67807136	396.462	2.82	9.2	-18.09	2	5	67	0	6	c1cc(cc(c1)NC(=O)[C@H]2CCCO2)CNC(=O)C3(CCC3)c4cccc(c4)F
60417141	397.45	2.53	7.6	-17.82	2	6	79	0	5	CC1CCN(CC1)C(=O)c2ccc(cc2)NC(=O)CNC(=O)c3ccccc3F
70020589	392.912	2.65	6.43	-10.02	2	6	66	0	5	c1cc(c(cc1Cl)NC(=O)NCc2csc(n2)C3CC3)N4CCOCC4
57482222	390.358	2.59	4.48	-17.11	2	5	75	0	6	CC(=O)Nc1cccc(c1)CNS(=O)(=O)c2ccc(c(c2)C(F)(F)F)F
67427293	392.912	2.75	7.7	-19.42	2	6	78	0	4	c1cc(ccc1[C@H](C2CCN(CC2)C(=O)Nc3nnc(s3)C4CC4)O)Cl
24684317	390.212	2.69	5.78	-12.27	3	5	74	0	4	c1ccc(c(c1)NC(=O)CNC(=O)c2cc3cc(ccc3[nH]2)F)Br
49413585	390.487	2.33	7.25	-14.62	2	6	68	0	6	c1ccc(cc1)CCN2CCN(CC2)C(=O)CNC(=O)c3c[nH]c4c3cccc4
14254741	404.875	2.53	6.15	-11.68	2	6	77	0	4	c1ccc2c(c1)OC[C@@H](O2)CNC(=O)C[C@@H]3C(=O)Nc4cc(ccc4S3)Cl
31296582	391.805	2.8	6.24	-16.61	2	5	67	0	6	c1ccc(c(c1)Cn2cc(cn2)C(=O)NC[C@H](c3ccc(c(c3)F)F)O)Cl
20135642	402.248	2.7	8.06	-18.88	2	6	80	0	4	COc1cccc(c1)C(=O)NC2=N[C@@H](CC(=O)N2)c3ccc(cc3)Br
66677314	393.487	1.94	7.66	-21.74	2	6	79	0	6	Cc1ccc(cc1)C(=O)N2CCC(CC2)NC(=O)CCNC(=O)c3ccccc3
57592645	393.534	2.46	5.05	-13.08	2	6	79	0	6	CN(C)S(=O)(=O)c1ccc(s1)CNC(=O)NCc2ccc3c(c2)CCC3
69935169	393.459	2.69	7.42	-21.5	2	5	61	0	6	c1cc(c(cc1F)F)CCNC(=O)NCCC(=O)N2CCc3c(ccs3)C2
66962186	397.294	3	5.07	-18.36	2	5	75	0	6	c1ccc(cc1)S(=O)(=O)CCCNC(=O)Nc2cccc(c2)Br
56588783	390.216	2.54	9.05	-15.37	2	6	72	0	4	c1cc(ccc1NC(=O)NCc2cc(cc(c2)Br)F)n3cncn3
67158007	399.535	2.23	8.44	-15.38	2	6	79	0	6	C[C@H](C(C)C)NC(=O)C1CCN(CC1)C(=O)CNC(=O)c2ccc3c(c2)CCC3
4262946	403.482	1.4	8.98	-32.5	2	6	80	0	6	c1ccc2c(c1)ccn(c2=O)CC(=O)NCCC(=O)N[C@H]3CCCc4c3cccc4
20761663	391.471	2.57	8	-17.54	2	6	74	0	6	COc1ccc2c(c1)c3c([nH]2)CCN(C3)C(=O)CCC(=O)NCc4ccccc4
66439374	391.899	2.8	7.3	-18.35	2	6	79	0	6	Cc1ccc(c(c1)Cl)NC(=O)CCNC(=O)[C@@H]2CC(=O)N(C2)C3CCCC3
64765695	392.814	2.75	6.27	-18.65	2	6	77	0	5	c1cc(ccc1C(=O)NCCC(=O)Nc2cc3c(cc2Cl)OCCCO3)F
68165704	390.414	2.98	8.54	-19.71	2	5	67	0	4	c1ccc(cc1)C(=O)Nc2ccc(cc2)C(=O)N[C@H]3CCOc4c3cc(cc4)F
53991736	395.434	1.62	6.68	-16.62	2	6	79	0	5	c1cc(ccc1CNC(=O)[C@H]2C[C@@H]2c3ccc(cc3)F)C(=O)N4CCNC(=O)C4
67806939	396.274	2.69	7.14	-14.28	2	6	72	0	5	Cn1c(cc(c1Cl)Cl)C(=O)NCc2cccc(c2)NC(=O)[C@@H]3CCCO3
66427262	393.266	2.78	5.5	-11.99	2	6	80	0	5	COc1ccc(c(c1)C(=O)NCc2[nH]nc(n2)c3cccs3)Br
17295388	391.471	2.89	8.73	-20.12	2	6	74	0	6	Cc1ccc(c(c1)N2C[C@@H](CC2=O)C(=O)NCCc3c[nH]c4c3cccc4)OC
64525437	398.463	2.89	8.25	-19.28	2	6	76	0	6	Cc1ccccc1n2ccnc2SCC(=O)Nc3ccc(c(c3)C(=O)NC)F
68065451	394.805	2.72	6.02	-14.16	2	5	70	0	5	c1cc(ccc1N2CC[C@H](C2=O)C(=O)NC[C@@H](c3ccc(c(c3)F)F)O)Cl
67846016	390.487	2.5	6.45	-13.64	2	6	70	0	6	C[C@H]1CN(CCO1)Cc2cccc(c2)CNC(=O)c3c[nH]nc3c4ccccc4
66599238	392.301	2.57	8.14	-14.73	2	6	72	0	6	c1cc(cc(c1)Br)CCCNC(=O)NCc2nnc3n2CCCC3
67645831	390.365	1.85	6.46	-15.38	3	6	79	0	6	c1cc(c(cc1CNC(=O)NC[C@H](c2ccc(cc2F)F)O)F)n3ccnc3
45849969	396.285	1.58	4.97	-16.15	2	6	79	0	6	c1cc(ccc1C(=O)NCCC(=O)NCC(=O)N2CCCCC2)Br
72036985	413.493	2.6	8.01	-15.32	2	6	71	0	6	C[C@H]1CN(C[C@@H](O1)C)C(=O)c2ccc(cc2)CNC(=O)NCCc3ccccc3F
79020704	418.291	3	5.89	-14.49	2	6	71	0	5	C[C@@H]1C(=O)Nc2cc(ccc2N1C)C(=O)NCCOc3cccc(c3)Br
33172714	392.459	2.97	9.96	-15.19	2	5	71	0	4	c1cc2c(cc1NC(=O)CSc3c4c(c5cc(ccc5[nH]4)F)ncn3)CCC2
68950493	397.497	2.9	4.16	-20.5	2	6	79	0	6	C[C@H](C(=O)NCc1cccs1)Nc2ccc(c(c2)N3CCCS3(=O)=O)F
55896381	391.468	2.9	4.97	-22.76	2	6	79	0	6	Cc1ccccc1CNC(=O)CNc2cc(ccc2F)N3CCCS3(=O)=O
67928770	399.466	2.22	7.23	-13.86	2	6	71	0	5	C[C@@H]1CN(C[C@H](O1)C)C(=O)c2ccc(cc2)CNC(=O)NCc3cccc(c3)F
67607584	395.503	2.8	5.74	-10.72	2	6	63	0	6	C[C@H]1CN(CCO1)Cc2cccc(c2)CNC(=O)NC[C@@H]3Cc4ccccc4O3
68713635	393.487	2.86	8.29	-16.27	2	6	79	0	6	Cc1ccc(cc1C)C(=O)NCC(=O)N[C@@H](C)c2cccc(c2)N3CCCC3=O
78881352	392.503	2.99	7.62	-14.65	2	6	72	0	6	C[C@@H]1CN(CCN1C(=O)CCCc2ccc3c(c2)[nH]c(=O)[nH]3)Cc4ccccc4
50360091	397.45	2.66	7.88	-18.79	2	6	79	0	6	c1ccc(cc1)CC(=O)N2CCC[C@H](C2)C(=O)NCC(=O)Nc3cccc(c3)F
94119261	390.53	2.75	5.47	-17.05	2	5	75	0	6	c1cc2c3c(c1)[C@@H](C[C@H]3CCC2)NC(=O)CCNS(=O)(=O)c4cccs4
66677237	390.487	2.52	8.72	-15.46	2	6	78	0	5	Cc1ccc(cc1)C(=O)N2CCC(CC2)NC(=O)CCc3[nH]c4ccccc4n3
68077855	396.34	1.83	5.5	-15.02	2	5	70	0	5	c1cc(c(cc1F)F)[C@H](CNC(=O)[C@@H]2CC(=O)N(C2)c3cc(cc(c3)F)F)O
67158832	391.471	2.67	8.45	-16.47	2	6	79	0	4	CC(=O)N1CCCc2c1ccc(c2)NC(=O)CNC(=O)c3ccc4c(c3)CCC4
67174683	393.487	2.59	7.71	-14.82	2	6	79	0	5	Cc1ccc(cc1)C(=O)N2CCC(CC2)NC(=O)CNC(=O)c3cccc(c3)C
67156475	393.487	2.46	7.71	-10.48	2	6	71	0	6	c1ccc(c(c1)CNC(=O)CNC(=O)c2ccc3c(c2)CCC3)N4CCOCC4
15134809	390.281	3	6.16	-10.75	2	5	61	0	6	CN(C)c1ccc(cc1)CNC(=O)CNC(=O)c2ccccc2Br
66284906	390.386	2.66	6.34	-15.53	2	6	77	0	6	CC(=O)Nc1cc(c(cc1F)F)NC(=O)c2ccc(cc2)OC[C@@H]3CCCO3
43150479	394.519	2.85	8.31	-14.64	2	6	65	0	5	Cc1cc(c(c(c1)C)NC(=O)N2CCN(CC2)CC(=O)NCc3ccccc3)C
77893619	396.878	2.82	7.8	-22.9	2	6	78	0	5	c1ccc2c(c1)CCN(C2)C(=O)CCNC(=O)Cc3c4ccc(cc4[nH]n3)Cl
66824302	391.468	2.68	6.91	-14.93	2	6	80	0	6	C[C@@H](C(=O)Nc1ncc(s1)Cc2ccccc2F)NC(=O)C3CCOCC3
49240489	394.443	2.26	4.53	-12.91	3	5	71	0	6	c1cc(cc(c1)F)OC[C@@H](CNC(=O)N[C@H]2CCSc3c2cc(cc3)F)O
65698779	392.232	2.79	7.76	-16.76	2	6	71	0	5	c1ccn2c(c1)nnc2CNC(=O)NCCc3cc(ccc3F)Br
77894360	402.907	2.95	7.04	-19.42	2	6	78	0	5	c1cc2c(n[nH]c2c(c1)Cl)CC(=O)N3CC[C@@H](C3)NC(=O)Cc4cccs4
54018250	390.468	2.21	8.53	-33.1	2	6	80	0	5	Cc1nc(cs1)c2cc([nH]c2)C(=O)Nc3ccc(cc3)Cn4ccccc4=O
67567630	395.425	2.93	8.47	-16.51	2	5	61	0	5	c1cc(cc(c1)C(F)(F)F)[C@H]2C[C@@H]2NC(=O)NC3CCN(CC3)C(=O)C4CC4
68708821	394.5	2.61	7.48	-16.92	2	6	74	0	5	C[C@H](c1cccc(c1)N2CCCC2=O)NC(=O)NCc3nc4ccccc4s3
67242916	391.269	2.14	7.19	-21.51	2	6	76	0	6	CCNC(=O)Cn1ccc(n1)NC(=O)[C@@H]2C[C@H]2c3ccccc3Br
66599763	392.301	2.86	8.38	-14.5	2	6	72	0	6	C[C@H](c1nnc2n1CCC2)NC(=O)NCCCc3cccc(c3)Br
54082448	397.381	2.86	6.04	-17.94	2	6	80	0	6	CC(=O)Nc1ccc(c(c1)C(=O)NCc2ccc(nc2)Oc3ccc(cc3)F)F
68909932	395.431	2.87	5.22	-20.19	2	6	79	0	5	c1cc(cc(c1)F)CS(=O)(=O)N2CC[C@H](C2)NC(=O)Nc3ccc(cc3)F
64267841	393.487	2.99	7.8	-20.11	2	6	71	0	6	c1cc(ccc1CNC(=O)NCCC(=O)N2CCCC2)c3ccc4c(c3)CCO4
68928401	391.393	2.93	7.36	-21.39	2	5	61	0	5	CC(=O)Nc1ccc(c(c1)C(=O)NC[C@H]2CCN(C2)c3ccc(c(c3)F)F)F
72036984	413.493	2.6	7.84	-15.62	2	6	71	0	6	C[C@@H]1CN(C[C@@H](O1)C)C(=O)c2ccc(cc2)CNC(=O)NCCc3ccccc3F
69407616	390.386	2.39	5.63	-15.21	2	6	69	0	4	c1cc2c(cc1F)[C@@H](CCO2)NC(=O)NCCc3cc(cc4c3OCOC4)F
64015619	407.539	1.83	7.52	-15.34	2	5	65	0	6	CN(Cc1ccsc1)Cc2ccc(c(=O)[nH]2)C(=O)N[C@@H]3CCCc4c3cccc4
69110302	391.418	2.14	4.22	-12.88	3	6	74	0	6	c1cc(cc(c1)F)[C@H](CNC(=O)NCc2ccc(c(c2)F)N3CCOCC3)O
63317797	392.499	2.74	8.48	-14.76	2	5	67	0	6	c1ccc2c(c1)CCC[C@@H]2C(=O)NCc3cccc(c3)C(=O)NC[C@@H]4CCCO4
68394590	399.195	1.98	4.79	-11.94	2	6	78	0	4	c1cc(c(cc1N2CC[C@@H](C2=O)C(=O)NCc3c(cn[nH]3)Br)F)F
63796940	390.281	2.68	7.18	-10.5	2	5	61	0	6	CN(Cc1ccccc1)C(=O)CNC(=O)NCc2cccc(c2)Br
51483999	397.397	1.62	6.06	-11.93	2	6	79	0	6	c1cc(ccc1C(=O)NCC(=O)N2CCC[C@@H](C2)C(=O)NC3CC3)C(F)(F)F
67590113	396.285	2.76	5.4	-13.33	2	6	71	0	5	c1cc(ccc1[C@@H]2CN(CCO2)C(=O)NCCNC(=O)C3CC3)Br
7956714	395.431	2.91	4.8	-14.64	2	6	79	0	6	c1cc(cc(c1)S(=O)(=O)N2CCCC2)NCC(=O)Nc3ccc(cc3F)F
66136800	392.569	2.64	7.18	-11.43	2	6	74	0	6	C[C@H]1CCCCN1C(=O)[C@@H](C)NC(=O)NCCCc2nc3c(s2)CCCC3
18049203	419.403	2.64	7.48	-14.75	2	6	79	0	6	Cc1ccc(cc1)CN2C[C@@H](CC2=O)C(=O)NCC(=O)Nc3ccc(c(c3F)F)F
59392551	402.232	2.48	4.81	-8.83	2	5	67	0	5	C[C@@H]([C@@H]1CCCO1)NC(=O)CNC(=O)c2ccccc2I
67937146	391.143	3	6.26	-22.2	2	5	71	0	5	c1cc(cc(c1)OCC(=O)Nc2cc(c[nH]c2=O)Br)C(F)(F)F
77970425	409.511	1.86	7.89	-18.98	2	6	79	0	5	c1cc(ccc1CC(=O)N2CCCC2)CNC(=O)c3ccc4c(c3)SCC(=O)N4
60397964	397.45	2.8	8.04	-18	2	6	79	0	5	c1ccc(c(c1)C(=O)NCC(=O)Nc2ccc(cc2)C(=O)N3CCCCCC3)F
67607583	395.503	2.8	5.74	-10.79	2	6	63	0	6	C[C@@H]1CN(CCO1)Cc2cccc(c2)CNC(=O)NC[C@@H]3Cc4ccccc4O3
67594184	395.434	1.94	7.72	-18.13	2	6	79	0	6	c1cc(cc(c1)F)[C@H]2C[C@@H]2NC(=O)CNC(=O)c3ccc(cc3)N4CCCC4=O
66194531	418.291	2.59	5.56	-13.52	2	6	71	0	5	c1cc(ccc1C(=O)N2CCOCC2)NC(=O)CNc3ccc(cc3)Br
69774516	396.535	2.86	6.91	-13.74	3	6	79	0	6	c1ccc(cc1)Cn2c3c(cn2)[C@@H](CCC3)NC(=O)NC[C@H](C4CCCCC4)O
70833917	399.249	2.78	4.7	-14.03	3	5	78	0	6	C[C@H](C(=O)NC[C@@H](c1cccc(c1)F)O)NC(=O)c2cccc(c2Cl)Cl
62290733	391.471	1.22	6.57	-15.98	2	6	74	0	5	C[C@H]1CN(CCO1)Cc2cccc(c2)CNC(=O)c3c[nH]c4ccccc4c3=O
66824298	391.468	2.73	6.93	-16.27	2	6	80	0	6	C[C@@H](C(=O)Nc1ncc(s1)Cc2ccc(cc2)F)NC(=O)C3CCOCC3
48175255	390.386	1.58	4.95	-20.53	2	6	79	0	6	COc1ccccc1N2C[C@@H](CC2=O)C(=O)NC[C@H](c3ccc(c(c3)F)F)O
65038041	395.41	2.29	5.92	-14.81	2	6	72	0	6	Cc1csc(n1)CNC(=O)NCc2ccc(cc2)n3ccc(n3)C(F)(F)F
72472607	396.83	2.98	7.05	-15.72	2	6	80	0	4	c1cc(ccc1c2ccc(c(=O)[nH]2)C(=O)NCc3ccc4c(c3)OCCO4)Cl
24152452	392.912	2.53	5.3	-17.02	2	6	74	0	6	CN1CCc2c(sc(n2)NC(=O)CCCNC(=O)c3ccc(cc3)Cl)C1
77860587	390.468	2.82	9.97	-19.15	2	6	76	0	6	c1cc(cc(c1)NC(=O)c2cc3cccn3cn2)CC(=O)NCc4cccs4
65038032	395.41	2.29	5.91	-14.84	2	6	72	0	6	Cc1nc(cs1)CNC(=O)NCc2ccc(cc2)n3ccc(n3)C(F)(F)F
65319766	398.29	2.01	6.04	-11.17	2	6	79	0	5	c1cc(c(cc1C(=O)NCC(=O)N2CCC[C@@H](C2)C(=O)NC3CC3)Cl)Cl
70831673	395.406	2.19	4.18	-19.06	3	5	78	0	6	Cc1nc(cs1)c2cc([nH]c2)C(=O)NC[C@H](c3ccccc3C(F)(F)F)O
69752101	392.282	2.43	6.14	-11.78	2	6	72	0	5	c1cnn(c1)c2ccc(cn2)CNC(=O)NCc3c(ccs3)Br
44454474	393.896	2.92	5.48	-17.78	2	6	79	0	6	c1ccc2c(c1)CCN2S(=O)(=O)CCNC(=O)NCc3ccc(cc3)Cl
7640203	405.376	2.56	0.06	-18.74	2	6	78	0	6	c1cc(ccc1C(=O)NCC(=O)Nc2ccc(cc2)N3CCCC3=O)C(F)(F)F
55833705	397.45	1.99	7.75	-19.09	2	6	79	0	5	CC(=O)N1CCC[C@H](C1)C(=O)NCc2cccc(c2)NC(=O)c3cccc(c3)F
19742660	412.541	2.86	9.86	-11.4	2	6	70	0	6	Cc1cccc(n1)CNc2c3ccc(nc3[nH]n2)[C@@H]4CCCN(C4)Cc5ccccc5
19748147	396.516	1.92	7.44	-29.52	2	6	78	0	6	Cc1nc(cs1)CC(=O)N2CC[C@H](C2)C(=O)NCCc3c[nH]c4c3cccc4
55941577	393.418	2.44	8.82	-23.66	2	6	80	0	6	C[C@H](c1ccc(cc1)NC(=O)c2ccc(cc2)F)NC(=O)Cn3ccccc3=O
54082445	397.381	2.86	6.07	-17.84	2	6	80	0	6	CC(=O)Nc1cc(ccc1F)C(=O)NCc2ccc(nc2)Oc3ccc(cc3)F
79033182	395.45	2.29	5.45	-22.22	2	6	79	0	6	CC(C)(C)C(=O)N1CCC[C@@H](C1)C(=O)NCCNC(=O)c2c(cccc2F)F
52556358	395.434	2.78	7.21	-15.64	3	6	79	0	6	C#Cc1cccc(c1)NC(=O)CNC(=O)N[C@H](c2ccc(cc2)F)[C@@H]3CCCO3
77952601	392.484	2.08	7.01	-18.59	2	6	76	0	6	c1ccc(cc1)CNC(=O)c2ccc(cc2)CNC(=O)c3cnn4c3SCC4
68077771	398.409	2.56	8.08	-19	2	5	71	0	6	Cc1cccc(c1)Cn2cccc(c2=O)C(=O)NC[C@H](c3ccc(cc3F)F)O
66347894	394.397	3	5.72	-10.46	2	6	66	0	6	c1cc(cnc1)CNC(=O)NC2CCN(CC2)c3ccc(cc3)OC(F)(F)F
71974559	396.672	2.5	5.01	-18.04	2	5	71	0	6	c1cc(ccc1C(=O)NCCC(=O)NCc2ccc(nc2)Cl)Br
68844579	398.26	2.88	6.22	-12.85	2	5	71	0	5	c1cc2cccnc2c(c1)CNC(=O)CNC(=O)c3cccc(c3)Br
24144983	398.303	2.57	5.99	-15.68	2	5	73	0	6	c1c(cc(cc1C(F)(F)F)OCC(=O)N2CCC[C@@H](C2)C(=O)N)C(F)(F)F
41451540	397.244	2.92	3.62	-10.89	3	5	71	0	6	COc1ccc(cc1)[C@H](CNC(=O)NCc2cc(ccc2F)Br)O
48167201	397.25	2.86	3.47	-10.86	2	6	77	0	5	c1cc2c(cc1CNC(=O)CNC(=O)c3ccc(s3)Br)OCO2
65232961	401.438	2.89	7.28	-20.31	2	5	71	0	6	Cc1c(sc(n1)CC(=O)Nc2ccc(c(c2)F)F)C(=O)NCc3ccccc3
69346694	394.519	2.94	8.72	-17.17	2	6	65	0	6	CC(C)N(C)c1cccc(c1)NC(=O)NCc2cccc(c2)C(=O)N3CCCC3
66386729	397.809	1.39	4.32	-12.06	2	6	75	0	5	c1cc(c(cc1[C@H](CNc2c(cc(cn2)C(=O)N3CCOCC3)Cl)O)F)F
63314236	391.471	2.52	6.89	-15.03	3	6	79	0	6	c1ccc(cc1)C#CCNC(=O)NCc2cccc(c2)C(=O)NC[C@@H]3CCCO3
67203141	393.462	2.79	7.66	-18.9	2	5	61	0	6	C#CCN1CCC(CC1)C(=O)Nc2ccc(cc2)C(=O)NCc3ccccc3F
72038278	417.239	2.9	4.75	-14.12	3	5	78	0	6	C[C@H](C(=O)NC[C@@H](c1ccc(cc1F)F)O)NC(=O)c2cccc(c2Cl)Cl
71940828	402.498	2.65	7.89	-16.12	2	6	68	0	5	Cc1ccc(c(=O)[nH]1)C(=O)Nc2ccc(cc2)N3CCN(CC3)Cc4ccccc4
72036967	413.493	2.63	8.03	-15.57	2	6	71	0	6	C[C@H]1CN(C[C@@H](O1)C)C(=O)c2ccc(cc2)CNC(=O)NCCc3cccc(c3)F
4052904	403.269	2.87	8.02	-17.63	2	6	76	0	5	c1ccnc(c1)CNC(=O)Nc2cccn(c2=O)Cc3c(cccc3Cl)Cl
64451649	399.191	2.98	6.03	-24.85	2	5	67	0	5	CNC(=O)c1cc(ccc1F)NC(=O)COc2ccc(cc2F)Br
69075917	396.365	2.31	3.52	-12.98	3	6	80	0	6	c1ccc(c(c1)[C@H](CNC(=O)NCc2ccc3c(c2)OCCO3)O)C(F)(F)F
67947371	395.706	2.62	2.69	-12.39	2	5	80	0	4	c1cc(c(cc1Br)S(=O)(=O)N2CCC(CC2)CC(=O)N)Cl
61636606	394.143	2.79	2.81	-12.12	2	5	72	0	6	c1cc(ccc1[C@H](CNC(=O)c2cc(oc2)Br)O)OC(F)(F)F
60498837	392.786	2.85	3.81	-14.46	2	5	75	0	6	c1cc(ccc1C(=O)NCCNS(=O)(=O)c2c(cc(cc2F)F)F)Cl
56738705	399.466	2.93	7.86	-14.77	2	6	71	0	5	C[C@H]1CN(C[C@@H](O1)C)C(=O)c2ccc(cc2)NC(=O)NCCc3cccc(c3)F
69749372	398.532	2.64	8.26	-13.65	2	6	74	0	5	Cc1cccc(c1)NC(=O)N2CCC[C@@H](C2)C(=O)NCc3csc(n3)C4CC4
53792664	399.397	1.99	7.56	-21.88	2	6	79	0	5	c1cc(cc(c1)NC(=O)[C@@H]2CC(=O)N(C2)c3cc(cc(c3)F)F)C(=O)NC4CC4
66140754	390.553	2.34	7.39	-17.62	2	6	74	0	6	C1CCc2c(nc(s2)CCCNC(=O)NC3CCN(CC3)C(=O)C4CC4)C1
68364687	393.237	2.59	2.88	-11.23	3	6	80	0	5	c1ccc(cc1)[C@@H](CNC(=O)NCc2cc3c(c(c2)Br)OCO3)O
68950489	397.497	2.9	4.17	-21.17	2	6	79	0	6	C[C@@H](C(=O)NCc1cccs1)Nc2ccc(c(c2)N3CCCS3(=O)=O)F
67701791	398.301	2.93	5.72	-14.58	2	6	71	0	6	CC(=O)NC[C@H]1CCCN(C1)C(=O)NCCOc2cccc(c2)Br
22390341	403.28	2.86	6.63	-11.5	2	6	74	0	5	c1cc(cc(c1)Br)C(=O)NCC(=O)Nc2ccc(nc2)N3CCCC3
63796585	390.285	2.76	8.6	-14.51	2	6	70	0	4	c1cc(cc(c1)Br)CNC(=O)N[C@H]2CCCN(C2)c3ncccn3
69322368	393.418	2.36	8.27	-25.37	2	6	72	0	4	c1ccn(c(=O)c1)Cc2cccc(c2)NC(=O)N[C@@H]3CCOc4c3cc(cc4)F
32102253	406.269	2.96	7.07	-14.81	2	6	79	0	5	c1ccc(cc1)N2C[C@H](CC2=O)C(=O)NCC(=O)Nc3ccc(cc3Cl)Cl
71286346	408.408	2.15	8.75	-24.27	2	6	80	0	6	c1ccc(c(c1)c2ccc(=O)n(n2)CC(=O)NCCc3c[nH]c4c3cc(cc4)F)F
67174676	397.45	2.28	7.12	-17.79	2	6	79	0	5	Cc1ccc(cc1)C(=O)N2CCC(CC2)NC(=O)CNC(=O)c3ccccc3F
65245477	405.498	2.66	7.81	-15.37	2	6	74	0	6	Cc1ccc2c(c1)cc(c(=O)[nH]2)CCC(=O)NCc3ccc(cc3)N4CCOCC4
17797707	393.262	2.84	4.63	-15.59	2	5	75	0	5	C#CCNC(=O)c1cccc(c1)S(=O)(=O)Nc2ccc(cc2)Br
69208335	391.418	2.97	4.9	-14.7	3	6	74	0	6	COc1ccc(cc1O)CNC(=O)NC[C@@H]2CCN(C2)c3ccc(c(c3)F)F
68665136	393.487	2.43	8.09	-23.54	2	6	79	0	6	CN(C)C(=O)c1cccc(c1)NC(=O)c2ccc(cc2)CNC(=O)C3CCCC3
63284315	391.487	2.6	6.21	-19.04	2	6	79	0	6	Cc1ccc(cc1F)C(=O)NCCNC(=O)[C@H]2CCCN(C2)C(=O)C(C)(C)C
63306727	413.493	2.63	7.86	-15.85	2	6	71	0	6	C[C@@H]1CN(C[C@@H](O1)C)C(=O)c2ccc(cc2)CNC(=O)NCCc3cccc(c3)F
66464777	396.878	2.89	8.21	-17.13	2	6	76	0	6	CC(C)NC(=O)c1cccc(c1)CNC(=O)c2cnn(c2)c3cccc(c3)Cl
66048504	391.269	1.88	6.1	-20.06	2	6	76	0	6	Cn1cc(cn1)[C@@H]2C[C@H]2C(=O)NCCC(=O)Nc3ccc(cc3)Br
48233835	396.466	2.8	9.07	-17.27	2	6	65	0	5	c1cc(ccc1CNC(=O)Nc2ccc(c(c2)N3CCCC3=O)F)N4CCCC4
66687216	390.484	2.67	5.35	-19.45	2	6	65	0	6	c1ccc(c(c1)C(=O)NCCN2CCN(CC2)C(=O)NCc3cccs3)F
69957307	394.306	2.93	8.59	-15.83	2	6	72	0	4	c1cc(c(c(c1)Cl)Cl)[C@H]2C[C@@H]2NC(=O)NCc3nnc4n3CCCCC4
57993530	398.429	1.57	4.46	-17.74	2	6	65	0	6	c1cc(cc(c1)C(=O)N2CCCC2)CNC(=O)N[C@@H]3CCN(C3)CC(F)(F)F
66829815	395.45	2.1	5.55	-14.08	2	6	71	0	6	C[C@H](C(=O)NC[C@@H]1CCN(C1)c2ccc(c(c2)F)F)NC(=O)C3CCOCC3
65232960	401.438	2.89	7.33	-15.55	2	5	71	0	6	Cc1c(sc(n1)CC(=O)Nc2cc(ccc2F)F)C(=O)NCc3ccccc3
67563714	397.497	2.49	4.66	-15.46	2	6	79	0	6	CN(C)S(=O)(=O)c1ccc(s1)CNC(=O)N[C@H]2C[C@@H]2c3cccc(c3)F
69344695	399.394	2.8	4.68	-19.59	2	6	79	0	4	c1cc(c(cc1NC(=O)NCc2cc(ccc2F)F)N3CCCS3(=O)=O)F
67910250	399.466	2.25	7.23	-13.51	2	6	71	0	5	C[C@@H]1CN(C[C@H](O1)C)C(=O)c2ccc(cc2)CNC(=O)NCc3ccc(cc3)F
54505665	392.908	2.38	5.76	-18.73	2	5	75	0	5	c1ccc2c(c1)CCC[C@H]2NC(=O)NCCS(=O)(=O)c3ccc(cc3)Cl
66361015	394.397	2.94	5.73	-10.63	2	6	66	0	6	c1cc(ccc1N2CCC(CC2)NC(=O)NCc3ccncc3)OC(F)(F)F
67067182	394.88	2.17	5.26	-13.83	2	6	77	0	5	CC(=O)NCc1ccc(s1)C(=O)NCc2cc3c(c(c2)Cl)OCCCO3
67022236	393.44	2.87	6.9	-15.38	2	5	71	0	5	CC(=O)NCc1ccc(s1)C(=O)Nc2nc(cs2)c3ccc(c(c3)F)F
8232111	408.527	3	8.93	-26.17	2	6	78	0	5	Cc1ccc(c(c1)C)NC(=O)Cc2nc(cs2)c3cc([nH]c3)C(=O)N4CCCC4
48149590	396.466	2.93	7.26	-16.9	2	6	65	0	6	C=CCNC(=O)c1ccc(cc1)NC(=O)N2CCN(CC2)Cc3ccccc3F
92167125	395.503	2.93	5.77	-10.38	2	6	63	0	5	C[C@@H]1CN(C[C@@H](O1)C)Cc2ccc(cc2)CNC(=O)Nc3ccc4c(c3)COC4
67242275	391.269	2.16	7.31	-20.75	2	6	76	0	6	CCNC(=O)Cn1ccc(n1)NC(=O)[C@@H]2C[C@H]2c3cccc(c3)Br
58632537	396.466	2.89	8.7	-12.21	2	6	65	0	4	CN1CCCc2c1ccc(c2)CNC(=O)Nc3cc(ccc3F)N4CCCC4=O
67972166	395.89	2.93	9.62	-18.1	2	5	65	0	6	c1cc(cc(c1)CN2CCCC2=O)CNC(=O)Cc3c[nH]c4c3ccc(c4)Cl
52643960	413.275	3	7.55	-21.73	2	6	76	0	5	Cn1cc(cn1)NC(=O)Cc2ccc(cc2)NC(=O)c3ccc(cc3)Br
47552630	397.656	2.89	3.37	-13.35	3	5	78	0	5	c1cc(ccc1C(=O)NCCNC(=O)c2cc(ccc2Cl)Br)O
57005041	390.487	2.87	7.54	-16.3	3	6	79	0	6	Cc1c(cn(n1)c2ccccc2)CCCNC(=O)N[C@@H]3c4ccccc4C[C@@H]3O
67937205	392.278	2.96	6.64	-23.87	2	5	75	0	5	c1ccc2c(c1)nc(s2)CCCC(=O)Nc3cc(c[nH]c3=O)Br
68722737	397.519	2.4	8.36	-18.8	2	6	79	0	6	c1cc(ccc1CNC(=O)C2CCCC2)C(=O)NC3CCN(CC3)C(=O)C4CC4
69085291	399.466	2.91	6.75	-15.24	3	6	79	0	6	CC(C)CC(=O)Nc1cccc(c1)CNC(=O)N[C@@H]2CCOc3c2cc(cc3)F
17304734	391.221	2.6	4.76	-12.66	2	6	77	0	4	c1cc(cc(c1)Br)C(=O)NCC(=O)Nc2ccc3c(c2)OCCO3
57672849	390.386	2.23	5.88	-24.43	2	6	77	0	6	C[C@H](c1ccc2c(c1)OCCO2)NC(=O)CCNC(=O)c3ccc(cc3F)F
77893617	396.878	2.96	8.1	-24.79	2	6	78	0	5	c1ccc2c(c1)CCCN2C(=O)CCNC(=O)Cc3c4ccc(cc4[nH]n3)Cl
66846951	399.466	2.53	6.44	-11.79	2	6	71	0	6	Cc1cccc(c1NC(=O)CNC(=O)CN2CCO[C@@H](C2)c3ccccc3F)C
66344332	391.468	2.68	5.11	-23.3	2	6	79	0	5	CS(=O)(=O)c1cccc(c1)NC(=O)NC[C@H]2CCN(C2)c3ccc(cc3)F
69225816	393.418	2.83	7.31	-11.66	2	6	72	0	5	c1ccnc(c1)[C@@H](c2ccc(cc2)F)NC(=O)NCc3ccc4c(c3)OCCO4
77892537	396.878	2.63	8.82	-14.59	2	6	76	0	6	Cc1c(nc2n1cc(cc2)Cl)C(=O)NCc3ccc(cc3)CC(=O)NC4CC4
66189665	390.434	2.79	5.12	-14.3	2	6	66	0	6	Cc1ccc(c(n1)OC)CNC(=O)NC[C@H]2CCN(C2)c3ccc(c(c3)F)F
67557794	399.822	2.74	3.45	-19.12	2	6	79	0	4	CS(=O)(=O)N1CCC[C@H](C1)NC(=O)Nc2ccc(c(c2)C(F)(F)F)Cl
47616890	393.896	2.9	5.47	-17.95	2	6	79	0	6	c1ccc2c(c1)CCN2S(=O)(=O)CCNC(=O)NCc3cccc(c3)Cl
64490849	390.487	2.81	6.75	-11.62	2	6	70	0	5	Cc1cccc(c1)C2(CC2)C(=O)Nc3ccc4c(c3)nc([nH]4)CN5CCOCC5
67022670	393.44	2.87	7.09	-14.07	2	5	71	0	5	CC(=O)NCc1ccc(s1)C(=O)Nc2nc(cs2)c3cc(ccc3F)F
68481847	397.233	2.98	5.98	-10.95	2	5	67	0	4	c1cc(c(cc1C(=O)NCC(=O)N[C@H]2CCOc3c2cc(cc3)F)Cl)Cl
23365122	394.45	2.87	6.05	-19.08	2	6	68	0	6	c1ccc2c(c1)c(c[nH]2)C(=O)CN3CCN(CC3)CC(=O)Nc4ccc(cc4)F
20745366	401.466	2.51	8.34	-24.86	2	6	79	0	6	c1ccc(cc1)N2C[C@H](CC2=O)C(=O)NCCNC(=O)c3ccc4ccccc4c3
67336328	398.406	2.77	5.23	-16.22	2	5	75	0	6	CNS(=O)(=O)c1ccc(cc1)C(=O)N[C@H]2C[C@@H]2c3cccc(c3)C(F)(F)F
69395078	396.535	2.96	6.71	-11.96	2	6	70	0	6	C[C@@H]1CN(CCO1)Cc2cccc(c2)CNC(=O)c3c[nH]nc3C4CCCCC4
30444122	397.859	2.75	2.38	-16.17	2	6	79	0	5	c1cc(ccc1CNS(=O)(=O)c2ccc(c(c2)Cl)F)N3CCNC(=O)C3
78417734	419.275	2.6	6.12	-18.14	2	6	77	0	5	CC(=O)Nc1ccc(cc1)CCNC(=O)c2cc3c(c(c2)Br)OCCO3
11041159	401.41	3	4.17	-19.6	2	6	79	0	6	Cc1ccc(cc1S(=O)(=O)N(C)C)NC(=O)CNc2ccc(c(c2F)F)F
67369685	391.269	2.51	6.85	-11.02	2	6	76	0	6	c1cc(cc(c1)C(=O)NC[C@@H]2CCCO2)CNc3ncc(cn3)Br
49240485	394.443	2.26	4.53	-12.92	3	5	71	0	6	c1cc(cc(c1)F)OC[C@@H](CNC(=O)N[C@@H]2CCSc3c2cc(cc3)F)O
65512014	392.301	2.65	8.69	-16.41	2	6	72	0	6	C[C@H](CCc1ccc(cc1)Br)NC(=O)NCc2nnc3n2CCC3
52077997	396.516	2.42	6.55	-18.65	2	6	68	0	6	c1ccc2c(c1)c(c[nH]2)CC(=O)N3CCN(CC3)CC(=O)NCc4cccs4
19662342	416.403	2.53	8.13	-23.38	2	6	78	0	6	c1cc(ccc1CNC(=O)c2ccc3c(c2)nc([nH]3)C(F)(F)F)CN4CCCC4=O
61637227	398.179	2	1.27	-10.15	2	6	75	0	6	c1cc(oc1C(=O)NCC(=O)N[C@H]2CCN(C2)CC(F)(F)F)Br
41944158	398.301	2.13	2.97	-10.83	2	6	71	0	6	C[C@@H]1CN(C[C@H](O1)C)CCNC(=O)CNC(=O)c2cccc(c2)Br
58631653	398.482	2.89	8.74	-15.95	2	6	65	0	5	CN(C)c1ccc(cc1F)CNC(=O)Nc2cccc(c2)C(=O)N3CCCCC3
69299150	394.45	2.68	6.42	-12.59	2	6	70	0	5	c1cc(cc(c1)F)[C@H]2C[C@@H]2C(=O)Nc3ccc4c(c3)nc([nH]4)CN5CCOCC5
70829581	396.394	2.26	3.59	-15.07	2	6	80	0	6	Cn1cc(cn1)c2nc(cs2)C(=O)NC[C@@H](c3ccccc3C(F)(F)F)O
67174602	395.793	2.54	6.46	-18.16	2	6	79	0	6	CN(CC(=O)Nc1cc(cc(c1)F)F)C(=O)CNC(=O)c2ccccc2Cl
66604219	396.878	3	7.23	-13.58	3	6	77	0	4	c1ccc2c(c1)c3c([nH]2)CCN(C3)C(=O)CNC(=O)NCc4ccc(cc4)Cl
66824305	391.468	2.7	6.93	-15.4	2	6	80	0	6	C[C@H](C(=O)Nc1ncc(s1)Cc2cccc(c2)F)NC(=O)C3CCOCC3
69969571	396.394	2.28	4.1	-14	2	6	80	0	6	Cn1cc(cn1)c2ncc(s2)C(=O)NC[C@@H](c3cccc(c3)C(F)(F)F)O
57146684	391.83	2.11	6.13	-19.78	2	6	79	0	6	CN(C)C(=O)c1cc(ccc1Cl)NC(=O)CNC(=O)Cc2cccc(c2)F
26565410	392.908	2.5	5.86	-14.77	2	5	75	0	6	c1ccc2c(c1)CCC[C@H]2NC(=O)CCNS(=O)(=O)c3cccc(c3)Cl
28731910	415.284	2.56	4.19	-15.32	2	5	75	0	6	CNS(=O)(=O)Cc1ccc(cc1)CNC(=O)c2cc(ccc2Br)F
17080606	394.471	3	9.37	-21.92	2	6	77	0	6	c1cc(ccc1Cc2ccc(cc2)NC(=O)[C@@H]3CCCO3)NC(=O)[C@H]4CCCO4
90731948	402.248	2.32	5.42	-18.11	2	6	80	0	5	CC(=O)Nc1cccc(c1)OCC#CCNC(=O)c2cc(cnc2)Br
24079727	394.5	2.35	8.08	-31.89	2	6	78	0	4	Cc1nc(cs1)c2cc([nH]c2)C(=O)N3CCC(CC3)C(=O)Nc4ccccc4
77261958	403.404	1.64	3.5	-12.73	3	5	78	0	5	c1ccc2c(c1)cc(cn2)CN[C@@H]3[C@H](C[C@H]([C@H]3O)O)c4ccc(nc4)C(F)(F)F
66084180	407.392	2.63	5.93	-16.13	2	6	71	0	6	c1cc(cc(c1)NC(=O)CNc2cccc(c2)C(F)(F)F)C(=O)N3CCOCC3
32752890	400.866	2.67	7.68	-12.8	2	5	71	0	5	c1ccc(c(c1)CNC(=O)CSc2c3c(cnn2)c4cc(ccc4[nH]3)F)Cl
67702383	396.516	2.85	6.16	-14.49	2	6	70	0	6	Cc1ccc(cc1)SCC(=O)Nc2ccc3c(c2)nc([nH]3)CN4CCOCC4
90746258	395.503	2.25	6.85	-15.08	2	6	73	0	6	Cc1ccc(cc1C)N2C[C@@H](CC2=O)C(=O)NC[C@@H](c3ccc(cc3)N(C)C)O
67932040	393.487	2.96	8.56	-17.5	2	6	71	0	5	C[C@H]1Cc2ccccc2N1C(=O)NCc3cccc(c3)C(=O)NC[C@@H]4CCCO4
53191675	398.413	2.9	8.12	-16.42	2	6	78	0	6	c1ccc2c(c1)[nH]c(n2)CCCNC(=O)[C@H]3CCN(C3=O)c4cc(cc(c4)F)F
53807926	390.386	2.1	4.85	-17.38	2	6	79	0	6	COc1ccc(cc1)[C@H](CNC(=O)[C@@H]2CCN(C2=O)c3ccc(c(c3)F)F)O
69066760	399.344	2.19	3.76	-12.32	2	6	72	0	6	c1cc2c(cc1F)[C@@H](CCO2)NC(=O)NCc3ccc(nc3)OCC(F)(F)F
65765584	395.228	2.93	5.89	-17.12	2	5	67	0	6	CC(=O)Nc1cc(ccc1F)C(=O)NCCOc2ccc(cc2)Br
69107624	399.466	2.97	6.64	-14.46	2	6	63	0	5	COc1cccc(c1)N2CC[C@H](C2)CNC(=O)N[C@@H]3CCOc4c3cc(cc4)F
40068893	393.487	2	7.49	-14.09	2	6	71	0	6	c1ccc(cc1)C2(CC2)CNC(=O)NCc3ccc(cc3)C(=O)N4CCOCC4
21601163	391.221	3	5.58	-18.87	2	6	77	0	4	C[C@@H]1C(=O)Nc2cc(ccc2O1)NC(=O)COc3ccc(cc3)Br
68928400	391.393	2.93	7.36	-20.79	2	5	61	0	5	CC(=O)Nc1ccc(c(c1)C(=O)NC[C@@H]2CCN(C2)c3ccc(c(c3)F)F)F
45591991	391.468	2.4	5.22	-14.88	2	6	79	0	6	c1cc(cc(c1)F)CNC(=O)NCc2ccc(cc2)S(=O)(=O)N3CCCC3
69208336	391.418	2.97	4.9	-15.04	3	6	74	0	6	COc1ccc(cc1O)CNC(=O)NC[C@H]2CCN(C2)c3ccc(c(c3)F)F
63796873	392.301	2.56	7.66	-17.98	2	6	72	0	5	c1cc(cc(c1)Br)CNC(=O)NCCc2nnc3n2CCCCC3
69208825	391.418	2.97	4.89	-14.61	3	6	74	0	6	COc1cc(ccc1O)CNC(=O)NC[C@@H]2CCN(C2)c3ccc(c(c3)F)F
52742329	416.275	2.46	5.31	-12.3	2	6	76	0	6	COc1ccc(cc1)[C@@H](CNC(=O)c2cnn(c2)c3ccc(cc3)Br)O
46308468	391.402	2.7	6.06	-15.92	2	6	80	0	5	c1ccc2c(c1)[C@@H](CC(=O)N2)C(=O)NCc3ccc(nc3)Oc4ccc(cc4)F
77929110	390.468	2.5	9.85	-18.46	2	6	76	0	6	c1cc(cc(c1)NC(=O)c2ccc3cncn3c2)CC(=O)NCc4cccs4
66699260	390.484	2.36	5.14	-19.91	2	6	65	0	6	c1ccc(c(c1)C(=O)NCCN2CCN(CC2)C(=O)NCc3ccsc3)F
44454863	396.516	2.23	6.2	-19.67	2	6	68	0	6	c1ccc2c(c1)c(c[nH]2)CC(=O)N3CCN(CC3)CCNC(=O)c4cccs4
55050341	392.5	1.75	5.47	-17.41	2	6	65	0	4	c1cc2c(cc1F)[C@@H](CCS2)NC(=O)N3CCN(CC3)CC(=O)NC4CC4
66824303	391.468	2.68	6.91	-14.72	2	6	80	0	6	C[C@H](C(=O)Nc1ncc(s1)Cc2ccccc2F)NC(=O)C3CCOCC3
79479228	401.873	2.65	8.49	-15.94	2	6	74	0	5	c1cc2c(cc1F)c(c[nH]2)CCNC(=O)[C@@H]3CCCN(C3)c4ccc(nn4)Cl
45376698	392.503	2.7	6.29	-15.73	3	6	79	0	6	c1ccc(cc1)C2(CC2)CNC(=O)N3CCN(CC3)Cc4ccc(cc4)C(=O)N
58877859	391.269	2.24	6.07	-13.4	2	6	74	0	6	CN(CCc1ccccn1)C(=O)CNC(=O)Nc2ccc(cc2)Br
67528491	391.393	2.96	8.13	-22.27	2	5	61	0	5	CN(C)C(=O)c1cccc(c1)NC(=O)N[C@H]2C[C@@H]2c3cccc(c3)C(F)(F)F
31567575	390.386	1.63	5.06	-20.54	2	6	79	0	6	COc1ccc(cc1)[C@H](CNC(=O)[C@@H]2CC(=O)N(C2)c3ccc(cc3F)F)O
53485365	391.83	1.94	6.08	-27.22	2	6	79	0	6	CN(C)C(=O)c1cc(ccc1Cl)NC(=O)CCNC(=O)c2ccc(cc2)F
69071622	396.365	2.55	3.62	-12.7	3	6	80	0	6	c1ccc(c(c1)[C@@H](CNC(=O)NC[C@H]2COc3ccccc3O2)O)C(F)(F)F
77952641	392.484	2.47	7.57	-20.18	2	6	76	0	6	c1ccc(cc1)NC(=O)Cc2ccc(cc2)CNC(=O)c3cnn4c3SCC4
69073070	392.484	2.65	7.3	-20.91	2	6	74	0	5	c1ccc(cc1)c2csc(n2)CNC(=O)N[C@H]3CCN(C3=O)c4ccccc4
67985610	396.878	2.95	9.58	-21.01	2	6	78	0	4	c1ccnc(c1)NC(=O)C2CCN(CC2)C(=O)Cc3c[nH]c4c3ccc(c4)Cl
60535617	393.896	2.87	5.61	-19.64	2	6	79	0	5	CNS(=O)(=O)Cc1ccc(cc1)CNC(=O)N2CCc3c2cc(cc3)Cl
12809517	413.905	2.34	8.42	-12.7	2	6	79	0	6	Cc1cccc(c1NC(=O)CNC(=O)[C@H]2CC(=O)N(C2)Cc3ccccc3Cl)C
13944828	395.434	2.15	8.26	-16.49	2	6	74	0	6	COc1ccc(cc1)NC(=O)[C@H]2CC(=O)N(C2)CCc3c[nH]c4c3cc(cc4)F
61582008	392.381	1.84	4.3	-19.89	2	6	74	0	6	c1cc(cc(c1)NC(=O)c2cccnc2)C(=O)N[C@@H]3CCN(C3)CC(F)(F)F
72036999	415.921	2.74	7.67	-13.2	2	6	71	0	5	C[C@@H]1CN(C[C@H](O1)C)C(=O)c2ccc(cc2)CNC(=O)NCc3cccc(c3)Cl
27845036	397.397	2.16	6.38	-14.31	2	6	79	0	5	c1ccc2c(c1)NC(=O)CN2C(=O)CCC(=O)N[C@H]3CCC[C@H](C3)C(F)(F)F
67594185	395.434	1.94	7.72	-18.15	2	6	79	0	6	c1cc(cc(c1)F)[C@@H]2C[C@H]2NC(=O)CNC(=O)c3ccc(cc3)N4CCCC4=O
53796929	408.285	2.67	6.88	-17.31	2	6	79	0	6	CN(C)C(=O)Cc1ccc(cc1)NC(=O)CNC(=O)c2ccc(c(c2)Cl)Cl
67174604	395.793	2.56	6.45	-17.21	2	6	79	0	6	CN(CC(=O)Nc1cc(cc(c1)F)F)C(=O)CNC(=O)c2cccc(c2)Cl
68364689	393.237	2.59	2.96	-11.15	3	6	80	0	5	c1ccc(cc1)[C@H](CNC(=O)NCc2cc3c(c(c2)Br)OCO3)O
65523303	392.786	2.96	4.43	-16.87	2	5	75	0	5	c1cc(ccc1S(=O)(=O)CCNC(=O)Nc2ccc(c(c2F)F)F)Cl
68599577	398.301	2.96	5.72	-13.96	2	6	71	0	6	CC(=O)NC[C@H]1CCCN(C1)C(=O)NCCOc2ccc(cc2)Br
67150224	394.471	2.89	7.82	-13.59	2	6	77	0	5	C[C@@H](c1ccc2c(c1)OCCCO2)NC(=O)CNC(=O)c3ccc4c(c3)CCC4
67056639	395.228	2.59	6.14	-18.36	2	5	67	0	6	CNC(=O)COc1ccc(cc1)CNC(=O)c2ccc(c(c2)F)Br
19236592	390.487	2.12	8.9	-18.31	2	6	78	0	6	Cc1cccc2c1[nH]cc2C[C@@H](C)NC(=O)[C@H]3CC(=O)N(C3)Cc4cccnc4
14109849	399.248	2.79	6.99	-12.98	2	6	76	0	5	c1ccc(c(c1)NC(=O)CNC(=O)c2ccc(cc2)n3cccn3)Br
59392558	402.232	2.48	4.26	-8.86	2	5	67	0	5	C[C@@H]([C@H]1CCCO1)NC(=O)CNC(=O)c2ccccc2I
72036968	413.493	2.63	8.01	-15.76	2	6	71	0	6	C[C@@H]1CN(C[C@H](O1)C)C(=O)c2ccc(cc2)CNC(=O)NCCc3cccc(c3)F
72450742	391.471	2.73	5.91	-13.8	2	6	74	0	6	c1ccc2cc(ccc2c1)c3ccc(c(=O)[nH]3)C(=O)NCCCN4CCOCC4
67369688	391.269	2.51	6.87	-10.95	2	6	76	0	6	c1cc(cc(c1)C(=O)NC[C@H]2CCCO2)CNc3ncc(cn3)Br
78664358	404.392	2.51	7.21	-14.46	2	6	80	0	6	Cc1cc(n(n1)c2ccc(cn2)C(=O)NC[C@H](c3cccc(c3)C(F)(F)F)O)C
64535843	397.294	2.42	4.1	-16.21	2	5	75	0	6	CNS(=O)(=O)Cc1cccc(c1)CNC(=O)c2cccc(c2)Br
54139208	395.228	2.91	5.86	-17.7	2	5	67	0	6	CC(=O)Nc1ccc(c(c1)C(=O)NCCOc2cccc(c2)Br)F
94036401	391.515	2.91	9.54	-18.65	2	5	61	0	5	CN(C)C(=O)c1cccc(c1)CCNC(=O)N[C@H]2C[C@@H]3CCCc4c3c2ccc4
65232954	401.438	2.89	7.33	-13.99	2	5	71	0	6	Cc1c(sc(n1)CC(=O)Nc2ccc(cc2F)F)C(=O)NCc3ccccc3
69165551	392.434	2.41	8.5	-18.89	2	6	76	0	6	Cn1cc(cn1)[C@@H]2C[C@H]2C(=O)Nc3ccc(cc3)C(=O)NCc4ccccc4F
70830321	394.397	2	4.88	-15.32	2	6	78	0	6	c1ccc(c(c1)[C@H](CNC(=O)C2CCN(CC2)c3cnccn3)O)C(F)(F)F
48485081	399.516	2.74	7.3	-17.78	2	6	71	0	6	Cc1ccc(cc1)SCCNC(=O)Nc2cccc(c2)C(=O)N3CCOCC3
71939877	393.497	2.84	7.04	-13.3	2	6	80	0	5	c1ccc(cc1)c2csc(n2)CNC(=O)Nc3nc(cs3)c4cccnc4
44454963	396.516	2.23	5.86	-19.38	2	6	68	0	6	c1ccc2c(c1)c(c[nH]2)CC(=O)NCCN3CCN(CC3)C(=O)c4cccs4
63094802	394.45	2.93	8.77	-21.01	2	6	78	0	4	CC(=O)N1CCC(CC1)C(=O)Nc2ccc3c(c2)nc([nH]3)Cc4ccccc4F
69208826	391.418	2.97	4.89	-14.94	3	6	74	0	6	COc1cc(ccc1O)CNC(=O)NC[C@H]2CCN(C2)c3ccc(c(c3)F)F
21530228	391.471	2.33	9.2	-15.35	2	6	78	0	6	Cc1ccc(o1)CNC(=O)CCC(=O)N2CCC(=CC2)c3c[nH]c4c3cccc4
68767549	399.535	2.12	7.97	-19.81	2	6	79	0	6	CC(C)NC(=O)C1CCN(CC1)C(=O)c2ccc(cc2)CNC(=O)C3CCCC3
40132244	394.5	2.9	9.68	-24.33	2	6	76	0	6	Cc1ccc(n1c2nc(cs2)CC(=O)Nc3ccc(cc3)C(=O)NC4CC4)C
58511420	393.534	2.1	4.32	-14.41	2	6	79	0	6	CC(=O)NCc1ccc(s1)S(=O)(=O)NCc2ccc3c(c2)CCCN3C
47993719	402.376	2.88	7.71	-17.5	2	6	78	0	5	c1cc(cc(c1)C(F)(F)F)CN2C[C@H](CC2=O)C(=O)Nc3cccc4c3[nH]nc4
66343842	396.466	3	6.79	-17.46	3	6	73	0	6	c1ccc2c(c1)[C@H](C(=O)N2)CCNC(=O)NC[C@@H]3CCN(C3)c4ccc(cc4)F
66439517	391.899	2.54	7.51	-20.54	2	6	79	0	6	Cc1ccc(c(c1)Cl)NC(=O)CCNC(=O)C2CCN(CC2)C(=O)C3CC3
78920287	395.503	2.77	7.42	-12.65	2	6	71	0	6	Cc1cccc(c1)CNC(=O)CNc2ccc(cc2)C(=O)N3C[C@H](O[C@@H](C3)C)C
48839414	390.487	2.65	8.51	-16.23	2	6	68	0	6	Cn1c2c(cn1)[C@@H](CCC2)NC(=O)NCc3cccc(c3)OCc4ccccc4
64405945	395.503	2.67	7.68	-17.26	2	6	79	0	6	CC(C)CNC(=O)CNC(=O)C1CCN(CC1)C(=O)c2cccc3c2cccc3
56528358	392.253	2.79	5.36	-19.36	3	6	79	0	6	CNC(=O)COc1ccc(cc1)CNC(=O)Nc2cccc(c2)Br
49406539	398.463	2.8	7.49	-14.15	2	6	78	0	4	c1cc(cc(c1)F)C(=O)NC2CCN(CC2)C(=O)c3cc(n[nH]3)c4cccs4
66342068	395.301	2.74	4.65	-11.11	3	6	73	0	6	c1cc(cc(c1)Br)N2CC[C@@H](C2)CNC(=O)NCC(=O)NC3CC3
68078073	396.34	2.29	5.58	-14.14	2	5	70	0	5	c1cc(c(cc1N2CC[C@H](C2=O)C(=O)NC[C@H](c3ccc(cc3F)F)O)F)F
71963720	395.434	1.57	6.64	-19.8	2	6	79	0	5	c1ccc(c(c1)[C@H]2C[C@@H]2C(=O)NCc3ccc(cc3)C(=O)N4CCNC(=O)C4)F
62292000	399.466	1.83	5.44	-16.01	2	6	71	0	6	C[C@H]1CN(CCO1)Cc2cccc(c2)CNC(=O)c3cc(ccc3F)NC(=O)C
66334278	390.48	2.52	5.11	-12.9	3	5	71	0	6	Cc1cccc(c1)OC[C@@H](CNC(=O)N[C@@H]2CCSc3c2cccc3F)O
62507998	395.282	2.98	5.98	-15.42	2	6	68	0	6	c1cc(ccc1OCCNC(=O)NCc2cn3ccsc3n2)Br
66094497	418.291	2.54	5.54	-14.99	2	6	71	0	5	c1cc(cc(c1)NC(=O)CNc2cccc(c2)Br)C(=O)N3CCOCC3
69085595	397.45	2.03	7.62	-16.54	2	6	71	0	4	C[C@@H](c1ccc(cc1)N2CCCC2=O)NC(=O)N[C@@H]3CCOc4c3cc(cc4)F
58420201	392.253	2.77	5.5	-16.26	3	6	79	0	6	COCC(=O)Nc1cccc(c1)NC(=O)NCc2cccc(c2)Br
56078616	392.455	2.81	8.34	-13.49	2	6	80	0	6	c1ccc2c(c1)c(=O)cc([nH]2)C(=O)Nc3cccc(c3)COC[C@H]4CCCCO4
66848900	399.466	2.55	6.45	-11.15	2	6	71	0	6	Cc1cccc(c1NC(=O)CNC(=O)CN2CCO[C@@H](C2)c3cccc(c3)F)C
15132676	390.468	2.98	7.94	-16.29	2	6	76	0	5	Cn1c2ccccc2nc1CNC(=O)c3ccc(cc3)NC(=O)c4cccs4
67232161	391.269	2.21	6.08	-14.87	2	6	74	0	6	CN(CCc1ccccn1)C(=O)CNC(=O)Nc2cccc(c2)Br
57479954	390.48	2.55	5.21	-12.55	3	5	71	0	6	Cc1cccc(c1)OC[C@H](CNC(=O)N[C@@H]2CCSc3c2cc(cc3)F)O
62088047	391.471	2.96	8.43	-14.44	2	6	75	0	5	c1ccc2c(c1)cc(o2)CNC(=O)NCc3cccc(c3)C(=O)N4CCCCC4
63859500	390.237	2.48	5.44	-12.44	2	6	72	0	5	c1cc(ncc1C(=O)NC2CC2)NCc3cc4c(c(c3)Br)OCO4
47528992	407.293	2.55	6.32	-20.95	2	6	76	0	6	c1ccc2c(c1)nc(s2)NCCNC(=O)Cn3cc(ccc3=O)Br
66342071	395.301	2.74	4.66	-11.59	3	6	73	0	6	c1cc(cc(c1)Br)N2CC[C@H](C2)CNC(=O)NCC(=O)NC3CC3
66334279	390.48	2.52	5.17	-12.77	3	5	71	0	6	Cc1cccc(c1)OC[C@H](CNC(=O)N[C@@H]2CCSc3c2cccc3F)O
12891305	412.511	2.95	6.88	-14.29	2	6	77	0	5	CCOc1cc2c(cc1CNC(=O)c3ccc4c(c3)NC(=O)CCS4)O[C@@H](C2)C
68714298	393.487	2.29	8.58	-16.53	2	6	79	0	6	Cc1cccc(c1)C(=O)N[C@H](C)C(=O)N[C@@H](C)c2cccc(c2)N3CCCC3=O
19236591	390.487	2.12	8.79	-22.72	2	6	78	0	6	Cc1cccc2c1[nH]cc2C[C@H](C)NC(=O)[C@H]3CC(=O)N(C3)Cc4cccnc4
32001104	390.484	2.28	4.24	-14.76	3	6	79	0	5	C[C@@H](C(=O)N1CCN(CC1)Cc2ccc(s2)c3ccccc3F)NC(=O)N
63252455	395.528	2.86	9.14	-19.61	2	5	65	0	5	Cc1c(c2ccccc2[nH]1)C(=O)N3CCC(CC3)C(=O)NCCc4cccs4
94020246	391.418	2.73	5.83	-10.82	2	6	63	0	6	COc1cc(cc(c1)F)CNC(=O)NCc2ccc(c(c2)F)N3CCOCC3
69427685	393.365	1.78	4.27	-17.9	3	6	79	0	5	c1cc(c(cc1F)F)C(=O)NCCNC(=O)N[C@H]2CCOc3c2cc(cc3)F
66430858	393.266	2.77	6.77	-14.55	2	6	80	0	6	c1cc(sc1)c2nc([nH]n2)CNC(=O)COc3ccc(cc3)Br
14742475	411.456	1.99	6.61	-20.2	2	6	72	0	6	Cn1c2c(c(n1)C(=O)NCc3ccncc3)C[C@@H](CC2)NCc4cccc(c4F)F
68430102	392.434	2.46	8.55	-17.78	2	6	76	0	6	Cn1cc(cn1)[C@@H]2C[C@H]2C(=O)Nc3ccc(cc3)C(=O)NCc4ccc(cc4)F
47293600	415.49	2.2	5.88	-13.38	2	6	79	0	5	Cc1ccc(o1)c2nc(cs2)C(=O)NCc3ccc(c(c3)F)N4CCC(CC4)O
89782904	398.89	2.42	7.68	-15.55	2	5	70	0	5	c1cc(ccc1[C@H](CNC(=O)[C@@H]2CC(=O)N(C2)c3ccc4c(c3)CCC4)O)Cl
66386733	397.809	1.39	4.32	-10.61	2	6	75	0	5	c1cc(c(cc1F)F)[C@H](CNc2c(cc(cn2)C(=O)N3CCOCC3)Cl)O
62287947	392.377	2.91	7.88	-20.21	2	5	67	0	6	c1ccc(c(c1)C(=O)NCc2cccc(c2)NC(=O)[C@H]3CCCO3)C(F)(F)F
66346936	398.482	2.98	8.72	-16.79	2	6	65	0	6	CC(=O)N(C)Cc1cccc(c1)NC(=O)NC[C@H]2CCN(C2)c3ccc(cc3)F
30668169	410.271	2.97	7.41	-17.29	2	5	71	0	5	c1cc(cc(c1)NC(=O)c2cccnc2)CNC(=O)c3ccc(cc3)Br
66136799	392.569	2.64	7.2	-11.59	2	6	74	0	6	C[C@@H]1CCCCN1C(=O)[C@@H](C)NC(=O)NCCCc2nc3c(s2)CCCC3
62289858	392.377	2.95	7.83	-15.69	2	5	67	0	6	c1cc(cc(c1)NC(=O)[C@H]2CCCO2)CNC(=O)c3ccc(cc3)C(F)(F)F
46308471	391.402	2.7	6.05	-14.92	2	6	80	0	5	c1ccc2c(c1)[C@H](CC(=O)N2)C(=O)NCc3ccc(nc3)Oc4ccc(cc4)F
77952676	398.532	2.28	7.32	-18.65	2	6	76	0	6	c1ccc(cc1)CNC(=O)C2CCC(CC2)CNC(=O)c3cnn4c3SCC4
68928949	390.434	2.2	7.09	-19.14	2	6	78	0	6	Cc1c(c(=O)[nH]c(n1)C)CCC(=O)NC[C@H]2CCN(C2)c3ccc(c(c3)F)F
51336640	392.5	2.38	5.92	-13.71	2	6	66	0	6	C[C@H]1CN(C[C@@H](O1)C)c2ccc(cc2F)CNC(=O)NCCc3nccs3
53282535	391.449	2.91	4.98	-15.71	2	6	76	0	6	c1cc(cc(c1)F)OC[C@@H](CNC(=O)c2cc3c(s2)nc4n3ccs4)O
50361228	399.466	2.82	5.94	-12.87	2	6	71	0	6	C[C@@H]1CN(C[C@H](O1)C)Cc2ccc(cc2)C(=O)NCC(=O)Nc3cccc(c3)F
3547637	405.248	2.92	6.61	-13.25	2	6	77	0	4	Cc1cc(ccc1NC(=O)CNC(=O)[C@H]2COc3ccccc3O2)Br
61854828	395.55	2.71	5.15	-14.87	2	6	79	0	6	CCCS(=O)(=O)N1CCC(CC1)NC(=O)NCc2csc3c2cccc3
63653589	397.381	2.49	8.16	-25.03	2	6	80	0	6	c1ccc(cc1)Cn2cccc(c2=O)C(=O)NCC(=O)Nc3ccc(c(c3)F)F
49240487	394.443	2.26	4.59	-12.88	3	5	71	0	6	c1cc(cc(c1)F)OC[C@H](CNC(=O)N[C@@H]2CCSc3c2cc(cc3)F)O
44454912	396.516	1.92	6.13	-21.59	2	6	68	0	6	c1ccc2c(c1)c(c[nH]2)CC(=O)N3CCN(CC3)CCNC(=O)c4ccsc4
93288035	399.466	2.54	7.79	-17.14	2	6	71	0	6	CNC(=O)c1ccc(cc1)CNC(=O)N2CCC(CC2)OCc3ccc(cc3)F
47252703	392.2	2.5	6.46	-12.3	2	5	78	0	5	c1cc(c(nc1)NCCNC(=O)c2ccc(cc2)I)C#N
56528169	392.253	2.77	5.51	-16.77	3	6	79	0	6	CNC(=O)COc1ccc(cc1)CNC(=O)Nc2ccccc2Br
44150041	394.519	2.94	8.12	-16.77	2	6	65	0	6	CC(C)NC(=O)Cc1ccc(cc1)NC(=O)N2CCN(CC2)Cc3ccccc3
45725218	392.912	2.54	4.94	-16.23	3	6	79	0	5	c1ccc(c(c1)CC(=O)N)NC(=O)N2CCN(CC2)Cc3ccc(s3)Cl
8075991	394.5	2.58	8.26	-26.01	2	6	78	0	5	Cc1ccccc1NC(=O)Cc2nc(cs2)c3cc([nH]c3)C(=O)N4CCCC4
12798890	393.44	2.75	6.99	-15.03	2	5	71	0	5	CC(=O)NCc1ccc(s1)c2csc(n2)NC(=O)c3ccc(c(c3)F)F
79020706	418.291	3	5.86	-14.77	2	6	71	0	5	C[C@H]1C(=O)Nc2cc(ccc2N1C)C(=O)NCCOc3cccc(c3)Br
53506304	390.487	2.25	7.19	-11.88	2	6	68	0	5	C[C@H](CNC(=O)c1cc(=O)c2ccccc2[nH]1)N3CCN(CC3)c4ccccc4
77261730	395.377	2.96	4.09	-19.82	3	5	79	0	5	COc1cccc(c1)C(=O)N[C@@H]2[C@H](C[C@H]([C@H]2O)O)c3ccc(cc3)C(F)(F)F
13629843	391.515	2.11	8.51	-11.51	3	5	70	0	4	C[C@@H](C(=O)N[C@H]1CCCc2c1cccc2)NC(=O)N[C@@H]3CCCc4c3cccc4
61205934	391.471	2.4	8.05	-16.91	2	6	79	0	5	c1ccc2c(c1)CC[C@@H](C2)NC(=O)CNC(=O)c3ccc(cc3)N4CCCC4=O
12304914	393.344	2.37	6.9	-19.44	2	6	76	0	4	c1ccc(c(c1)n2c3c(cn2)[C@@H](CCC3)NC(=O)c4cc(n[nH]4)C(F)(F)F)F
47464791	395.2	1.88	4.42	-10.91	2	5	71	0	5	c1ccc(c(c1)C(=O)NCC(=O)NCc2ccncc2)I
11968197	402.376	2.27	1.36	-20.28	2	6	76	0	6	CC(=O)Nc1cnn(c1)c2ccc(cc2)C(=O)NCc3cccc(c3)C(F)(F)F
4757485	399.516	2.24	7.07	-14.32	2	6	80	0	5	c1cc(cnc1)CNC(=O)c2c3c(sc2NC(=O)[C@@H]4CCCO4)CCCCC3
67174687	397.45	2.33	7.11	-14.09	2	6	79	0	5	Cc1ccc(cc1)C(=O)N2CCC(CC2)NC(=O)CNC(=O)c3ccc(cc3)F
69069459	399.466	2.48	6.55	-16.52	3	6	79	0	6	CC[C@H](C)NC(=O)c1cccc(c1)CNC(=O)N[C@@H]2CCOc3c2cc(cc3)F
47867473	390.487	2.76	8.89	-15.43	2	6	68	0	6	Cc1c(cn(n1)c2ccccc2)CCCNC(=O)N[C@H]3CCOc4c3cccc4
69108083	398.532	2.89	7.81	-22.93	2	6	74	0	6	c1ccc(cc1)N2CC[C@@H](C2=O)NC(=O)NCCCc3nc4c(s3)CCCC4
67563718	397.497	2.49	4.66	-15.19	2	6	79	0	6	CN(C)S(=O)(=O)c1ccc(s1)CNC(=O)N[C@@H]2C[C@H]2c3cccc(c3)F
68117114	392.503	2.43	6.35	-18.23	2	6	65	0	5	Cc1cccc(c1)N2CCN(CC2)Cc3ccc(cc3)NC(=O)[C@H]4CCC(=O)N4
55861843	418.291	2.54	5.54	-16.73	2	6	71	0	5	c1cc(cc(c1)NCC(=O)Nc2cccc(c2)Br)C(=O)N3CCOCC3
67193377	391.471	2.09	7.92	-19.21	2	6	79	0	5	c1cc(ccc1C(=O)N2CCCC2)NC(=O)CNC(=O)c3ccc4c(c3)CCC4
66284821	394.399	2.08	5.94	-17.91	2	6	77	0	5	CC(=O)Nc1cc(c(cc1F)F)NC(=O)CSc2ccc3c(c2)OCCO3
52742331	416.275	2.46	5.39	-12.27	2	6	76	0	6	COc1ccc(cc1)[C@H](CNC(=O)c2cnn(c2)c3ccc(cc3)Br)O
65851422	398.466	2.54	9.26	-24.43	2	6	76	0	6	Cn1cc(c2c1cccc2)CC(=O)Nc3cccc(c3)C(=O)NCc4ccccn4
14537118	393.466	1.9	6.59	-14.09	2	6	72	0	6	Cn1c2c(c(n1)C(=O)NCc3ccncc3)C[C@@H](CC2)NCc4cccc(c4)F
66710403	391.471	2.66	8.1	-25.27	2	6	74	0	5	C[C@@H]1CO[C@@H](CN1C(=O)CCNC(=O)c2c[nH]c3c2cccc3)c4ccccc4
93940562	390.53	2.53	5.52	-14.31	2	5	75	0	5	CC(=O)NCc1ccc(s1)S(=O)(=O)N[C@@H]2C[C@@H]3CCCc4c3c2ccc4
78444746	416.19	2.4	5.23	-9.83	2	5	71	0	5	C[C@@H](C(=O)NCc1ccco1)NC(=O)c2ccc(c(c2)F)I
66827386	394.443	2.27	5.22	-15.74	2	5	75	0	6	c1ccc2c(c1)CCC[C@@H]2NC(=O)CNc3cccc(c3)S(=O)(=O)C(F)F
69071614	396.365	2.55	3.63	-12.78	3	6	80	0	6	c1ccc(c(c1)[C@H](CNC(=O)NC[C@@H]2COc3ccccc3O2)O)C(F)(F)F
38715852	411.889	2.53	8.7	-23.76	2	6	79	0	6	c1cc(ccc1CC(=O)NC2CC2)NC(=O)[C@H]3CC(=O)N(C3)c4ccc(cc4)Cl
67662631	398.406	2.89	5.85	-18.73	2	5	75	0	5	CS(=O)(=O)c1ccc(cc1)NC(=O)N[C@H]2C[C@@H]2c3cccc(c3)C(F)(F)F
65927614	391.269	1.96	5.69	-11.37	2	6	68	0	4	c1ccc(cc1)N2CCN(CC2)C(=O)CNC(=O)c3cc(c[nH]3)Br
78444466	413.19	1.89	4.44	-14.3	2	5	71	0	5	c1cc(cnc1)C(=O)NCCNC(=O)c2ccc(c(c2)F)I
67660745	390.237	2.61	6.89	-31.37	2	6	80	0	4	c1cc(cc(c1)NC(=O)[C@@H]2CCCO2)C(=O)Nc3cccc(n3)Br
4160887	410.271	2.99	7.47	-13.27	2	5	71	0	5	c1cc(cnc1)CNC(=O)c2ccc(cc2)NC(=O)c3ccc(cc3)Br
69537720	391.471	2.27	8.06	-16.53	2	6	79	0	5	C[C@H]1C[C@H](c2c1cccc2)NC(=O)CNC(=O)c3ccc(cc3)N4CCCC4=O
31294719	394.805	2.23	5.79	-24.35	2	5	70	0	5	c1cc(cc(c1)Cl)N2C[C@@H](CC2=O)C(=O)NC[C@H](c3ccc(c(c3)F)F)O
53298113	399.397	2.48	7.72	-20.3	2	6	79	0	5	c1cc(ccc1C(=O)NC2CC2)NC(=O)[C@@H]3CCN(C3=O)c4ccc(c(c4)F)F
43918124	392.503	2.94	8.46	-17.08	2	6	65	0	5	Cc1ccccc1CN2CCN(CC2)C(=O)Nc3ccc(cc3)C(=O)NC4CC4
64525421	399.447	2.65	6.02	-19.88	2	6	80	0	6	Cc1nc(cs1)COc2ccc(cc2)C(=O)Nc3ccc(c(c3)C(=O)NC)F
14247346	409.461	2.18	8.35	-27.74	2	6	79	0	5	c1cc(cc(c1)NC(=O)C2CCN(CC2)C(=O)c3ccc(cc3)F)C(=O)NC4CC4
14537117	393.466	1.9	6.6	-13.23	2	6	72	0	6	Cn1c2c(c(n1)C(=O)NCc3ccncc3)C[C@H](CC2)NCc4cccc(c4)F
56357087	394.244	2.89	5.09	-13.38	3	5	70	0	6	c1ccc(c(c1)CNC(=O)NCCNC(=O)c2ccc(cc2)Br)F
68280455	391.537	2.39	6.66	-12.16	2	6	79	0	5	Cc1ccc(s1)C(=O)NCC(=O)N2CCC[C@H](C2)C(=O)NC3CCCCC3
58423901	390.281	2.72	7.37	-16.95	2	5	61	0	5	CN(C)C(=O)Cc1ccc(cc1)NC(=O)NCc2cccc(c2)Br
47275226	394.5	2.76	9.32	-24.35	2	6	76	0	5	c1ccn2cc(nc2c1)CSc3ccc(cc3)C(=O)N[C@@H]4CCCCNC4=O
67149628	399.878	2.7	8.35	-14.96	2	6	79	0	6	CN(CC(=O)Nc1ccccc1Cl)C(=O)CNC(=O)c2ccc3c(c2)CCC3
91807103	392.434	3	8.41	-18.16	2	6	72	0	6	Cc1c(c2cccc(c2[nH]1)F)CC(=O)NCc3cnn(c3)c4cccc(c4)OC
70812727	417.387	2.76	6.66	-18.77	2	6	74	0	6	c1ccc2c(c1)c(c[nH]2)C(=O)N3CC(C3)C(=O)NCc4ccc(cc4)OC(F)(F)F
78924053	393.497	2.86	7.29	-17.48	2	6	80	0	5	c1ccc(cc1)c2cnc(s2)NC(=O)NCc3nc(cs3)c4ccncc4
69177155	393.468	2.96	7.55	-17.06	2	6	78	0	6	CN(Cc1ccc(cc1)OCc2cccs2)C(=O)c3ccc4c(c3)[nH]c(=O)[nH]4
29941946	397.294	3	4.23	-19.62	2	5	75	0	5	Cc1cc(ccc1Br)NC(=O)CNc2cccc(c2)S(=O)(=O)C
56167069	393.237	2.41	5.41	-19.09	2	6	77	0	5	CC(=O)Nc1cccc(c1)C(=O)Nc2cc(c(cc2Br)OC)OC
66907907	390.487	2.84	8.41	-13.56	3	6	79	0	5	C[C@@H](c1ccc(cc1)n2ccnc2)NC(=O)NC[C@]3(CCCc4c3cccc4)O
48300766	390.281	2.63	6.34	-13.5	2	5	71	0	6	CC[C@@H](C)NC(=O)c1cccc(c1)CNC(=O)c2cc(cnc2)Br
32905760	402.903	2.62	8.16	-19.49	2	5	67	0	4	c1cc2c(cc1OCC(=O)N[C@H]3CCSc4c3cc(cc4)Cl)CCC(=O)N2
62287779	396.462	2.82	9.22	-19.32	2	5	67	0	6	c1cc(cc(c1)NC(=O)[C@@H]2CCCO2)CNC(=O)C3(CCC3)c4cccc(c4)F
34899927	411.477	2.17	7.59	-18.7	2	6	79	0	6	Cc1ccccc1C(=O)N2CCC(CC2)C(=O)NCCNC(=O)c3ccc(cc3)F
67808421	392.377	2.93	7.85	-18.37	2	5	67	0	6	c1cc(cc(c1)NC(=O)[C@@H]2CCCO2)CNC(=O)c3cccc(c3)C(F)(F)F
49240491	394.443	2.26	4.59	-12.81	3	5	71	0	6	c1cc(cc(c1)F)OC[C@H](CNC(=O)N[C@H]2CCSc3c2cc(cc3)F)O
57479953	390.48	2.55	5.14	-12.71	3	5	71	0	6	Cc1cccc(c1)OC[C@@H](CNC(=O)N[C@@H]2CCSc3c2cc(cc3)F)O
12927624	394.88	2.76	6	-14.24	2	6	77	0	6	c1cc(sc1)C(=O)NCCCC(=O)Nc2cc3c(cc2Cl)OCCCO3
66048909	391.269	1.63	5.53	-14.81	2	6	76	0	6	Cn1cc(cn1)[C@@H]2C[C@H]2C(=O)NCCNC(=O)c3ccc(cc3)Br
60729886	399.245	2.38	5.24	-23.47	2	6	74	0	4	c1cc(c(cc1Br)F)NC(=O)Cc2csc(n2)N3CCNC3=O
31294322	396.34	1.83	5.79	-26.26	2	5	70	0	5	c1cc(c(cc1[C@@H](CNC(=O)[C@@H]2CC(=O)N(C2)c3ccc(cc3F)F)O)F)F
77197664	397.5	2.24	4.94	-16.87	2	6	79	0	5	CC(=O)Nc1ccc(cc1)S(=O)(=O)NCC#CCN2CCc3ccccc3C2
77930481	390.468	2.82	8.54	-17.12	2	6	76	0	6	c1cc2ccnn2c(c1)C(=O)Nc3ccc(cc3)CC(=O)NCc4cccs4
67032305	399.497	2.64	6.61	-14.86	2	6	80	0	5	CC(=O)NCc1ccc(s1)C(=O)Nc2nc(cs2)c3ccc4c(c3)CCO4
23111848	395.228	2.59	6.1	-23.69	2	5	67	0	6	CNC(=O)c1ccc(cc1)CNC(=O)COc2ccc(cc2F)Br
70785653	391.777	2.09	5.33	-13.96	2	6	79	0	6	Cc1ccc(cc1N2C[C@@H](CC2=O)C(=O)NCC(=O)NCC(F)(F)F)Cl
66824299	391.468	2.73	6.93	-15.96	2	6	80	0	6	C[C@H](C(=O)Nc1ncc(s1)Cc2ccc(cc2)F)NC(=O)C3CCOCC3
69068867	399.466	2.51	6.56	-15.51	3	6	79	0	6	CC[C@@H](C)NC(=O)c1ccc(cc1)CNC(=O)N[C@@H]2CCOc3c2cc(cc3)F
63284122	393.915	2.74	6	-19.17	2	6	79	0	6	CC(C)(C)C(=O)N1CCC[C@@H](C1)C(=O)NCCNC(=O)c2ccc(cc2)Cl
67041399	393.44	2.85	7.01	-15.11	2	5	71	0	5	CC(=O)NCc1ccc(s1)C(=O)Nc2nc(cs2)c3c(cccc3F)F
69067452	399.344	2.14	3.77	-13.1	2	6	72	0	6	c1cc2c(cc1F)[C@@H](CCO2)NC(=O)NCc3ccnc(c3)OCC(F)(F)F
32869219	394.88	2.58	5.37	-16.8	2	6	77	0	6	C[C@H](C(=O)NCCc1cc2c(c(c1)Cl)OCCO2)NC(=O)c3cccs3
14241670	394.452	2.83	6.79	-16.85	2	6	77	0	5	c1cc(sc1)C(=O)Nc2ccc(cc2)C(=O)NCc3ccc4c(c3)OCCO4
66357474	399.491	2.04	7.18	-16.01	3	5	70	0	5	c1cc(ccc1CNC(=O)N[C@@H]2CCSc3c2cc(cc3)F)C(=O)NC4CC4
66549041	390.439	3	7.99	-14.91	2	6	80	0	4	Cc1cccc(c1)c2ccc(c(=O)[nH]2)C(=O)NCc3ccc4c(c3)OCCCO4
44302049	398.282	2.82	4.54	-16.55	3	6	79	0	6	CNC(=O)COc1cccc(c1)NC(=O)NCc2ccc(s2)Br
45833923	393.462	2.99	9.48	-17.55	2	5	65	0	5	c1ccc2c(c1)c(c[nH]2)CCC(=O)NC3CCN(CC3)C(=O)c4ccccc4F
18123026	418.9	2.53	6.14	-10.49	2	6	65	0	6	c1ccc(cc1)CNC(=O)NCC(=O)N2CCN(CC2)Cc3c(cccc3Cl)F
66835881	395.297	2.12	5.83	-11.14	2	5	67	0	5	C[C@H](C(=O)N[C@H]1C[C@@H]1c2ccc(cc2)Br)NC(=O)C3CCOCC3
12703838	393.487	2.4	8.81	-14.68	2	6	78	0	6	Cc1ccc(o1)CNC(=O)CC[C@@H]2CCCN(C2)C(=O)c3ccc4c(c3)cc[nH]4
69204724	392.381	2.47	4.69	-15.02	3	6	79	0	6	Cn1c2ccccc2nc1CNC(=O)NC[C@@H](c3ccccc3C(F)(F)F)O
61898207	392.282	2.58	6.34	-12.08	2	6	72	0	5	c1cnn(c1)c2cc(ccn2)CNC(=O)NCc3ccc(s3)Br
66928561	399.535	2.86	8.29	-14.2	2	6	79	0	6	Cc1cc(cc(c1)C(=O)NCC(=O)N2CCC(CC2)NC(=O)CC3CCCC3)C
64397809	399.466	2.84	5.94	-11.36	2	6	71	0	6	C[C@@H]1CN(C[C@H](O1)C)Cc2ccc(cc2)C(=O)NCC(=O)Nc3ccc(cc3)F
44661802	401.257	2.66	3.94	-18.46	2	5	75	0	5	CS(=O)(=O)Nc1ccc(cc1)CNC(=O)c2ccc(cc2F)Br
67607426	395.503	1.96	5.45	-10.38	2	6	63	0	5	C[C@@H]1CN(CCO1)Cc2cccc(c2)CNC(=O)N[C@@H]3CCOc4c3cccc4
13724925	413.905	2.44	7.75	-16.24	2	6	79	0	6	c1ccc(cc1)C(=O)NCC(=O)N2CCC(CC2)C(=O)NCc3ccc(cc3)Cl
66942078	399.672	2.94	5.75	-9.56	2	5	71	0	5	Cc1cc(c(o1)C)C(=O)NCC(=O)NCc2ccc(cc2Cl)Br
56119728	391.269	2.55	5.9	-15.76	3	6	77	0	4	c1cc(cc(c1)NC(=O)N2CCCC2)CNC(=O)c3cc(c[nH]3)Br
66238981	399.314	2.42	3.37	-10.23	2	6	74	0	6	c1ccc(c(c1)c2nc([nH]n2)SC[C@H](CN3CCOCC3)O)Br
71983334	399.466	2.43	6.92	-14.37	2	6	71	0	6	C[C@@H]1CN(C[C@@H](O1)C)C(=O)CNc2ccc(cc2)C(=O)NCc3ccccc3F
48157586	394.45	2.61	8.45	-26.48	2	6	68	0	5	c1ccc2c(c1)c(c[nH]2)C(=O)NCCC(=O)N3CCN(CC3)c4ccccc4F
70872733	393.418	2.84	7.08	-20.35	2	6	80	0	6	C[C@H](c1ccc(cc1)NC(=O)c2ccncc2)NC(=O)c3ccc(cc3F)OC
70761394	404.466	2.54	6.69	-16.11	2	6	79	0	6	COc1ccc(cc1)N2C[C@@H](CC2=O)C(=O)NC[C@@H](c3cccc4c3cccc4)O
46286493	405.907	2.03	5.8	-15.31	2	6	79	0	6	c1cc(ccc1CNC(=O)CCc2ccc(s2)Cl)C(=O)N3CCNC(=O)C3
12900873	408.477	2.87	8.12	-15.97	2	6	68	0	4	Cc1cccc(c1C)NC(=O)CN2CCN(CC2)C(=O)c3cc4cc(ccc4[nH]3)F
47893435	395.282	2.92	4.42	-15.05	3	6	73	0	4	c1cc(cc(c1)N2CCNC2=O)NC(=O)NCc3ccc(s3)Br
68393236	395.257	2.91	5.34	-10.9	2	5	71	0	5	c1cc(ccc1Cc2ncc(s2)C(=O)NCc3c(cn[nH]3)Br)F
60399073	396.285	2.57	5.94	-23.99	2	6	79	0	6	c1cc(ccc1NC(=O)CCNC(=O)CN2CCCCCC2=O)Br
67105081	393.487	2.87	9.12	-17.59	2	6	79	0	6	Cc1cccc(c1C)NC(=O)CN(C)C(=O)CNC(=O)c2ccc3c(c2)CCC3
58677021	392.434	2.71	8.93	-17.5	2	6	76	0	6	c1ccc(c(c1)n2cc(cn2)C(=O)NCc3cccc(c3)NC(=O)C4CCC4)F
67294962	391.468	2.95	6.79	-11.11	2	6	71	0	5	CC(C)Oc1ccc(cc1NC(=O)NCC(=O)N2CCc3c(ccs3)C2)F
53464125	397.45	2.79	8.29	-18.17	2	6	79	0	6	CC(C)NC(=O)Cc1ccc(cc1)NC(=O)[C@@H]2CCN(C2=O)c3ccc(cc3)F
77860904	396.516	2.65	9.7	-15.02	2	6	76	0	6	c1cc2cc(ncn2c1)C(=O)NCC3CCC(CC3)C(=O)NCc4cccs4
69323649	391.221	3	5.41	-15.15	2	6	77	0	4	C[C@@H](C(=O)Nc1ccc2c(c1)NC(=O)CO2)Oc3ccc(cc3)Br
68065521	394.443	1.65	5.72	-13.91	2	5	70	0	6	c1cc(c(cc1[C@H](CNC(=O)CCC(=O)N2CCc3c(ccs3)C2)O)F)F
12739036	393.462	2.9	9.32	-14.38	2	5	65	0	5	c1ccc2c(c1)c(c[nH]2)CCNC(=O)[C@@H]3CCCN(C3)C(=O)c4ccc(cc4)F
67107148	394.443	2.81	5.36	-18.83	2	5	75	0	6	CC(C)NS(=O)(=O)c1cc(ccc1F)C(=O)N[C@@H]2C[C@H]2c3cccc(c3)F
67701927	396.447	1.84	8.73	-18.18	2	6	76	0	4	c1cc(c(cc1CNC(=O)c2ccc3c(c2)NC(=O)CCS3)F)n4ccnc4
12547539	398.772	2.76	7.03	-16.7	2	6	80	0	5	C[C@@H](c1[nH]c2ccccc2n1)NC(=O)Cn3cc(cc(c3=O)Cl)C(F)(F)F
69211159	392.43	2.95	7.81	-14.41	2	5	67	0	5	c1ccc2c(c1)cccc2CC(=O)NCC(=O)N[C@H]3CCOc4c3cc(cc4)F
77909156	390.468	1.96	8.17	-18.69	2	6	76	0	6	c1cc(cc(c1)NC(=O)c2cc3n(c2)ccs3)CC(=O)NCc4ccncc4
12919471	391.349	2.05	6.42	-23.89	2	6	79	0	5	c1ccc(c(c1)N2C[C@H](CC2=O)C(=O)NCC(=O)Nc3ccc(c(c3)F)F)F
67063825	397.294	2.96	5.66	-10.23	2	5	60	0	4	c1cc2c(cc1CNC(=O)NCc3cc(cs3)Br)OCCCO2
94072281	397.313	2.8	5.57	-16.67	2	5	67	0	6	C[C@H]1CC(C[C@@H](O1)C)C(=O)NCCCNC(=O)c2ccc(cc2)Br
94036535	398.528	2.84	7.19	-18.99	2	5	75	0	5	CS(=O)(=O)c1ccc(cc1)CCNC(=O)N[C@H]2C[C@H]3CCCc4c3c2ccc4
67910233	395.503	2.49	7.96	-14.28	2	6	71	0	6	C[C@H]1CN(C[C@@H](O1)C)C(=O)c2ccc(cc2)CNC(=O)NCCc3ccccc3
70761350	392.43	2.64	7.4	-15.31	2	5	70	0	5	c1ccc2c(c1)cccc2[C@@H](CNC(=O)[C@@H]3CC(=O)N(C3)c4ccc(cc4)F)O
32899250	411.955	2.25	4.64	-13.21	2	6	71	0	6	C[C@@H]1CN(C[C@H](O1)C)CCCNC(=O)C[C@@H]2C(=O)Nc3cc(ccc3S2)Cl
69298652	394.45	2.71	6.42	-13.52	2	6	70	0	5	c1cc(ccc1[C@H]2C[C@@H]2C(=O)Nc3ccc4c(c3)nc([nH]4)CN5CCOCC5)F
67660746	390.237	2.61	6.87	-31.79	2	6	80	0	4	c1cc(cc(c1)NC(=O)[C@H]2CCCO2)C(=O)Nc3cccc(n3)Br
32869220	394.88	2.58	5.37	-16.84	2	6	77	0	6	C[C@@H](C(=O)NCCc1cc2c(c(c1)Cl)OCCO2)NC(=O)c3cccs3
12634322	404.873	2.88	6.23	-10.99	2	6	65	0	5	c1ccc(c(c1)N2CCN(CC2)C(=O)CNC(=O)NCc3ccc(cc3)F)Cl
60499148	398.406	2.95	5.83	-16.19	2	5	75	0	6	c1cc(cc(c1)NC(=O)C2CCC2)CNS(=O)(=O)c3c(cc(cc3F)F)F
69926499	391.24	2.84	6.36	-15.81	3	4	72	0	5	c1ccc(c(c1)[C@@H]2C[C@H]2C(=O)N[C@@H](c3cccc(c3)Br)C(=O)N)F
48234045	393.365	2.86	6.98	-19.06	2	6	71	0	6	c1ccc(c(c1)CNC(=O)Nc2ccc(c(c2)N3CCCC3=O)F)OC(F)F
47378920	392.484	2.54	7.83	-16.37	2	6	74	0	5	c1ccc(cc1)c2csc(n2)CNC(=O)Nc3ccc(cc3)N4CCCC4=O
63734092	417.239	2.9	4.66	-15.86	3	5	78	0	6	C[C@H](C(=O)NC[C@H](c1ccc(c(c1)F)F)O)NC(=O)c2cccc(c2Cl)Cl
68018787	398.2	2.28	5.18	-9.93	2	5	71	0	5	C[C@H](C(=O)NCc1ccco1)NC(=O)c2cccc(c2)I
58748544	399.859	2.82	4.76	-16.44	2	6	80	0	5	c1cc(ccc1OCc2nc(cs2)C(=O)Nc3ccc4c(c3)C(=O)NC4)Cl
13691704	399.878	2.71	7.61	-16.39	2	6	79	0	5	c1ccc(cc1)C(=O)NCC(=O)N2CCC(CC2)C(=O)Nc3cccc(c3)Cl
59799793	408.458	2.99	9.23	-25.07	2	6	76	0	6	c1cc(cc(c1)NC(=O)c2ccc(cc2)F)CNC(=O)Cc3cn4ccsc4n3
68708817	394.5	2.61	7.48	-16.67	2	6	74	0	5	C[C@@H](c1cccc(c1)N2CCCC2=O)NC(=O)NCc3nc4ccccc4s3
66925406	395.503	2.9	5.13	-10.25	3	6	74	0	5	c1ccc2c(c1)CCC[C@]2(CNC(=O)NCc3ccc(cc3)N4CCOCC4)O
67809112	391.471	1.22	6.58	-15.51	2	6	74	0	5	C[C@@H]1CN(CCO1)Cc2cccc(c2)CNC(=O)c3c[nH]c4ccccc4c3=O
38678448	408.479	2.84	8.47	-19.73	2	6	77	0	6	c1ccc2c(c1)OC[C@@H](O2)C(=O)Nc3ccc(cc3)CC(=O)NCc4cccs4
69069455	399.466	2.48	6.55	-16.51	3	6	79	0	6	CC[C@@H](C)NC(=O)c1cccc(c1)CNC(=O)N[C@@H]2CCOc3c2cc(cc3)F
67148860	392.499	2.49	8.38	-11.1	2	5	70	0	5	c1ccc(cc1)[C@H](C2CCN(CC2)C(=O)CNC(=O)c3ccc4c(c3)CCC4)O
43820044	391.468	2.64	5.17	-17.16	2	6	79	0	5	CS(=O)(=O)c1ccc(c(c1)NC(=O)NC[C@H]2CCN(C2)c3ccccc3)F
31294393	392.377	2.12	6.21	-25.73	2	5	70	0	5	Cc1ccc(c(c1)F)N2C[C@@H](CC2=O)C(=O)NC[C@H](c3ccc(c(c3)F)F)O
67973346	397.862	2.51	7.18	-17.31	2	6	74	0	4	c1cc(cc(c1)NC(=O)Cc2c[nH]c3c2ccc(c3)Cl)C(=O)N4CCOCC4
64396840	393.418	2.82	8.78	-22.09	2	6	80	0	6	Cc1cccc(c1)Cn2cccc(c2=O)C(=O)NCC(=O)Nc3ccc(cc3)F
42664753	399.447	2.67	6.66	-14.6	2	6	80	0	6	Cc1nc(cs1)COc2ccc(cc2)C(=O)Nc3ccc(c(c3)NC(=O)C)F
68164771	396.443	2.88	7.52	-14.19	2	5	67	0	4	c1cc(sc1)C(=O)Nc2ccc(cc2)C(=O)N[C@H]3CCOc4c3cc(cc4)F
66284908	390.386	2.66	6.25	-15.47	2	6	77	0	6	CC(=O)Nc1cc(c(cc1F)F)NC(=O)c2ccc(cc2)OC[C@H]3CCCO3
69776584	390.281	2.64	7.7	-18.31	2	5	63	0	5	c1ccn(c(=O)c1)CCCNC(=O)N[C@@H]2CCc3c2cccc3Br
56738935	399.466	2.9	7.83	-14.25	2	6	71	0	5	C[C@H]1CN(C[C@@H](O1)C)C(=O)c2ccc(cc2)NC(=O)NCCc3ccccc3F
29837126	396.285	2.33	5.6	-13.11	2	6	79	0	6	CC(C)CN1C[C@H](CC1=O)C(=O)NCC(=O)Nc2ccccc2Br
27081890	390.415	2.33	6.56	-17.26	2	6	78	0	5	CN(C)C(=O)c1cccc(c1)NC(=O)CSc2[nH]c3cc(c(cc3n2)F)F
67435206	398.406	2.8	5.82	-16.8	2	5	75	0	6	CC(=O)Nc1ccc(cc1)S(=O)(=O)N[C@@H]2C[C@H]2c3cccc(c3)C(F)(F)F
68200520	391.88	2.93	5.1	-13.52	3	6	79	0	6	COc1ccc(cc1NCCC(=O)Nc2ccc3c(c2)NC(=O)CS3)Cl
67334422	396.871	2.96	5.66	-14.75	2	5	75	0	6	C[C@@H](C(=O)N[C@@H]1C[C@H]1c2cccc(c2)F)NS(=O)(=O)c3ccc(cc3)Cl
94071511	397.313	2.78	5.56	-18.8	2	5	67	0	6	C[C@@H]1CC(C[C@H](O1)C)C(=O)NCCCNC(=O)c2cccc(c2)Br
94055168	393.553	2.76	5.08	-17.83	2	6	79	0	5	CC1(CC[C@@H](c2c1cccc2)CNC(=O)NC[C@H]3CCN(C3)S(=O)(=O)C)C
68927466	417.247	1.65	1.65	-10.79	2	6	71	0	6	c1ccc(c(c1)C(=O)NCC(=O)NCCN2CCOCC2)I
46029367	399.426	2.38	9.8	-14.78	2	6	79	0	6	c1cc2cc(cc(c2nc1)CSc3nnc(n3N)COc4ccc(cc4)F)F
13944803	409.461	2.52	9.06	-14.76	2	6	74	0	6	Cc1ccc(c(c1)NC(=O)[C@@H]2CC(=O)N(C2)CCc3c[nH]c4c3cc(cc4)F)OC
57852747	390.381	2.57	5.3	-17.65	2	6	65	0	6	c1ccc(c(c1)C(=O)NCCNC(=O)N2CCCN(CC2)CC(F)(F)F)F
68118239	391.449	2.93	5.03	-15.92	2	6	76	0	6	c1cc(ccc1OC[C@H](CNC(=O)c2cc3c(s2)nc4n3ccs4)O)F
84419373	398.463	1.98	7.95	-16.83	2	6	78	0	5	c1cc(ccc1c2c[nH]c(n2)CNC(=O)CN3CCCc4c(ccs4)C3=O)F
65765583	395.228	2.93	5.85	-17.04	2	5	67	0	6	CC(=O)Nc1ccc(c(c1)C(=O)NCCOc2ccc(cc2)Br)F
64037244	390.468	2.6	9.32	-24.16	2	6	80	0	6	c1cc(cc(c1)Cn2cccn2)CNC(=O)c3ccc([nH]c3=O)c4cccs4
63890241	394.5	2.4	7.22	-24.57	2	6	74	0	6	CN(C)C(=O)c1cccc(c1)NC(=O)CNc2ccc3c(c2)sc(n3)C4CC4
58430973	390.159	2.88	5.16	-16.9	3	5	74	0	4	c1cc(cc(c1)Br)CNC(=O)Nc2cc(c[nH]c2=O)C(F)(F)F
67910241	395.503	2.49	7.94	-14.5	2	6	71	0	6	C[C@@H]1CN(C[C@H](O1)C)C(=O)c2ccc(cc2)CNC(=O)NCCc3ccccc3
93534050	390.281	2.64	2.95	-12.3	3	5	70	0	4	c1cc(c(c(c1)Br)O)CN2CCN(CC2)c3ccc(cc3)C(=O)N
15773605	391.471	2.64	9.27	-23.35	2	6	74	0	6	CCC(=O)N1c2ccccc2C[C@H]1C(=O)NCCc3c[nH]c4c3cc(cc4)OC
42926718	399.466	2.71	7.42	-18.59	2	6	71	0	6	COc1ccc(cc1)CCNC(=O)NC2CCN(CC2)C(=O)c3ccccc3F
64496129	394.45	2.55	6.16	-12.06	2	6	70	0	5	c1cc(ccc1C2(CC2)C(=O)Nc3ccc4c(c3)nc([nH]4)CN5CCOCC5)F
77929184	396.516	2.34	9.59	-15.12	2	6	76	0	6	c1cc(sc1)CNC(=O)C2CCC(CC2)CNC(=O)c3ccc4cncn4c3
21412630	390.516	2.51	5.04	-17.39	2	6	71	0	4	c1ccc2c(c1)c(nc(n2)CN3CCN(CC3)Cc4nc5ccccc5s4)N
51482879	392.377	2.55	6.41	-17.8	2	5	70	0	6	c1cc(cc(c1)C(F)(F)F)CN2C[C@@H](CC2=O)C(=O)Nc3cccc(c3)CO
32899251	411.955	2.25	4.56	-10.95	2	6	71	0	6	C[C@@H]1CN(C[C@@H](O1)C)CCCNC(=O)C[C@@H]2C(=O)Nc3cc(ccc3S2)Cl
69260917	392.793	2.03	6.62	-18.48	2	6	80	0	5	Cc1nc(nn1c2ccccc2Cl)C(=O)NC[C@H](c3ccc(cc3F)F)O
65914427	391.537	2.39	6.69	-15.26	2	6	79	0	5	Cc1ccc(s1)C(=O)NCC(=O)N2CCC(CC2)C(=O)NC3CCCCC3
71963708	411.889	2.09	7.03	-18.27	2	6	79	0	5	c1ccc(c(c1)[C@H]2C[C@@H]2C(=O)NCc3ccc(cc3)C(=O)N4CCNC(=O)C4)Cl
60499618	392.786	2.8	3.8	-16.6	2	5	75	0	6	c1ccc(c(c1)C(=O)NCCNS(=O)(=O)c2c(cc(cc2F)F)F)Cl
66848362	397.45	2.62	6.09	-20.75	2	6	71	0	6	c1cc(cc(c1)F)[C@@H]2CN(CCO2)CC(=O)Nc3cccc(c3)C(=O)NC4CC4
49243190	392.402	2.55	4.62	-16.03	3	6	80	0	5	C[C@H](c1ccc2c(c1)OCCCO2)NC(=O)NC[C@@H](c3ccc(c(c3)F)F)O
90746279	401.894	2.1	6.19	-14.08	2	6	73	0	6	CN(C)c1ccc(cc1)[C@H](CNC(=O)[C@@H]2CC(=O)N(C2)c3ccc(cc3)Cl)O
28200596	395.2	1.94	4.4	-10.9	2	5	71	0	5	c1ccc(c(c1)C(=O)NCC(=O)NCc2cccnc2)I
61507147	396.248	2.78	8.96	-17.89	2	6	76	0	4	c1ccc2c(c1)ncn2c3ccc(cn3)CNC(=O)c4cc(c[nH]4)Br
65109495	395.528	2.77	9.11	-11.66	2	5	65	0	5	Cc1c([nH]c2c1cc(cc2)CNC(=O)CCC(=O)N3CCc4c(ccs4)C3)C
6599783	391.349	2.01	0.16	-15.27	2	6	78	0	5	c1cc(ccc1C(=O)NCC(=O)Nc2ccc(c(c2F)F)F)N3CCCC3=O
68108131	396.878	2.19	7.69	-20.28	2	6	78	0	4	c1cc2c(cc1Cl)[nH]cc2CC(=O)N3CCC(CC3)NC(=O)c4ccncc4
92167127	395.503	2.93	6.05	-10.06	2	6	63	0	5	C[C@@H]1CN(C[C@H](O1)C)Cc2ccc(cc2)CNC(=O)Nc3ccc4c(c3)COC4
94017665	393.553	2.64	5.37	-15.7	2	6	79	0	4	CC1(CC[C@@H](c2c1cccc2)CNC(=O)NC3CCN(CC3)S(=O)(=O)C)C
40284161	390.418	2.99	8.69	-23.16	2	6	80	0	6	c1ccc2c(c1)c(c[nH]2)CCNC(=O)Cn3c(=O)ccc(n3)c4ccccc4F
94071508	397.313	2.78	5.56	-18.82	2	5	67	0	6	C[C@H]1CC(C[C@@H](O1)C)C(=O)NCCCNC(=O)c2cccc(c2)Br
66925491	394.45	2.58	7.87	-13.76	3	6	79	0	5	c1ccc2c(c1)CCC[C@@]2(CNC(=O)NCc3ccc(c(c3)F)n4ccnc4)O
69076447	395.406	2.97	3.88	-13.09	3	5	74	0	6	c1ccc(c(c1)[C@H](CNC(=O)NCc2nc3ccccc3s2)O)C(F)(F)F
64419731	391.221	2.35	3.8	-12.64	2	6	77	0	4	COc1ccc(cc1CNC(=O)c2ccc3c(c2)NC(=O)CO3)Br
57479955	390.48	2.55	5.14	-12.7	3	5	71	0	6	Cc1cccc(c1)OC[C@@H](CNC(=O)N[C@H]2CCSc3c2cc(cc3)F)O
67175050	398.2	2.08	3.35	-10.17	2	5	71	0	6	c1ccnc(c1)C(=O)NC[C@@H](COc2ccc(cc2)I)O
48363853	393.487	2.4	7.22	-15.82	2	6	79	0	6	Cc1ccc(c(c1)C)CCC(=O)NCc2ccc(cc2)C(=O)N3CCNC(=O)C3
69935181	390.534	1.28	5.84	-19.41	2	6	74	0	6	c1csc2c1CN(CC2)C(=O)CCNC(=O)NCc3csc(n3)C4CC4
54193791	393.487	2.28	8.48	-23.16	2	6	79	0	6	CC(=O)N1CCC(CC1)C(=O)Nc2ccc(cc2)C(=O)NCCc3ccccc3
12798286	398.2	2.79	5.55	-14.58	2	5	71	0	6	c1cc(cc(c1)I)NC(=O)CCCNC(=O)c2ccco2
54650531	393.431	2.75	3.78	-18.18	2	6	79	0	6	CS(=O)(=O)N[C@H]1CCCN(C1)C(=O)NCCc2ccccc2C(F)(F)F
12687914	397.525	2.77	8.45	-16.58	2	5	71	0	5	c1ccc2c(c1)CCC[C@@H]2NC(=O)Cc3csc(n3)NC(=O)c4cccs4
41409014	396.31	2.92	4.96	-13.37	3	5	70	0	6	CCNC(=O)c1cccc(c1)CNC(=O)NCc2ccc(s2)Br
94072283	397.313	2.8	5.57	-16.62	2	5	67	0	6	C[C@@H]1CC(C[C@H](O1)C)C(=O)NCCCNC(=O)c2ccc(cc2)Br
93533857	390.281	2.87	2.91	-11.59	3	5	70	0	4	c1cc(ccc1C(=O)N)N2CCN(CC2)Cc3cc(ccc3O)Br
70778001	399.878	2.15	8.27	-17.98	2	6	79	0	5	Cc1ccc(cc1N2C[C@@H](CC2=O)C(=O)NCc3cccc(c3)NC(=O)C)Cl
48827392	392.503	2.65	7.24	-11.87	2	6	77	0	6	C[C@@H]1CN(C[C@H](O1)C)Cc2ccc(cc2)CNC(=O)NCc3cccc(c3)C#N
58586941	392.282	1.98	8.17	-13.15	2	6	72	0	5	c1cc(ccc1CNC(=O)NCc2c(ccs2)Br)n3cncn3
56102236	399.397	2.76	7.39	-20.07	2	6	79	0	6	C=CCNC(=O)c1ccc(cc1)NC(=O)[C@@H]2CCN(C2=O)c3ccc(c(c3)F)F
65929881	394.5	2.57	8.31	-18.96	2	6	76	0	6	CCn1c2ccccc2nc1CCNC(=O)C[C@@H]3C(=O)Nc4ccccc4S3
12889393	398.2	2.82	5.55	-13.37	2	5	71	0	6	c1cc(oc1)C(=O)NCCCC(=O)Nc2ccc(cc2)I
12914522	402.248	1.95	5.69	-19.25	2	6	79	0	4	c1ccc2c(c1)NC(=O)CN2C(=O)CCNC(=O)c3ccc(cc3)Br
56927449	395.503	2.88	8.28	-11.95	2	6	73	0	6	CN(Cc1ccccc1)C(=O)CNC(=O)N2CCC(CC2)[C@@H](c3ccccc3)O
39484752	400.306	3	6.16	-10.59	2	6	79	0	5	C[C@@H]1C[C@H](CN(C1)C(=O)CNC(=O)CNC(=O)c2ccc(cc2Cl)Cl)C
70840952	391.418	2.61	6.48	-14.34	2	6	75	0	6	Cc1cc(c(o1)C)C(=O)NCC(=O)NC[C@H]2CCN(C2)c3ccc(c(c3)F)F
71285011	390.418	2.04	8.61	-21.31	2	6	80	0	6	c1ccc(cc1)c2ccc(=O)n(n2)CC(=O)NCCc3c[nH]c4c3cc(cc4)F
32752886	396.447	2.04	6.62	-13.57	2	6	80	0	6	COc1ccccc1CNC(=O)CSc2c3c(cnn2)c4cc(ccc4[nH]3)F
94017853	391.537	2.34	5.94	-15.69	2	6	79	0	4	CCS(=O)(=O)N1CCC(CC1)NC(=O)N[C@@H]2C[C@H]3CCCc4c3c2ccc4
67174594	397.328	2.16	6.09	-18.2	2	6	79	0	6	CN(CC(=O)Nc1cc(cc(c1)F)F)C(=O)CNC(=O)c2ccc(cc2F)F
68662226	394.5	1.85	7.84	-21.89	2	6	78	0	5	Cc1nc(cs1)c2cc([nH]c2)C(=O)N[C@@H](C)c3ccc(cc3)N4CCCC4=O
20733684	390.237	2.67	5.25	-13.21	2	6	76	0	5	Cn1c2ccccc2cc1C(=O)NCCNC(=O)c3ccc(o3)Br
66238980	399.314	2.42	3.43	-10.29	2	6	74	0	6	c1ccc(c(c1)c2nc([nH]n2)SC[C@@H](CN3CCOCC3)O)Br
67828170	390.386	2.97	7.91	-22.98	2	6	77	0	6	C[C@H](C(=O)Nc1ccc(cc1)NC(=O)[C@H]2CCCO2)Oc3ccc(c(c3)F)F
69402962	397.45	2.71	6.98	-15.47	3	6	79	0	5	C[C@@H](c1ccc(cc1)NC(=O)C2CC2)NC(=O)N[C@@H]3CCOc4c3cc(cc4)F
44455014	396.516	1.45	5.87	-20.46	2	6	68	0	6	c1ccc2c(c1)c(c[nH]2)CC(=O)NCCN3CCN(CC3)C(=O)c4ccsc4
69254339	393.163	2.52	2.47	-13.14	3	6	79	0	5	c1cc(c(cc1NC(=O)Nc2cnn(c2)CCO)C(F)(F)F)Br
69253878	390.221	2.98	4.17	-9.4	2	5	60	0	6	c1cc(cc(c1)I)NC(=O)NCCOC[C@@H]2CCOC2
72461340	394.402	2.74	7.38	-16.48	2	6	80	0	4	c1cc(ccc1c2ccc(c(=O)[nH]2)C(=O)NCc3ccc4c(c3)OCCCO4)F
54140497	392.481	2.72	5.7	-19.48	2	6	74	0	6	CN(C)c1nc2c(s1)cc(s2)C(=O)NCCNC(=O)c3ccccc3F
65438649	393.344	2.73	9.08	-14.92	2	6	72	0	5	Cc1nccn1c2cc(ccn2)CNC(=O)Nc3ccc(c(c3)C(F)(F)F)F
64257421	397.168	2.86	6.89	-16.28	2	5	79	0	6	c1cc(ccc1C(=O)N)OCC(=O)Oc2ccc(cc2)I
44036746	402.491	1.89	7.34	-18.92	2	5	70	0	6	c1cc(ccc1CC(=O)N2CCC(CC2)O)NC(=O)CSc3ccc(cc3)F
23003523	392.814	2.81	6.65	-20.22	2	6	77	0	4	CC(=O)Nc1ccc(c(c1)NC(=O)Cc2cc3c(c(c2)Cl)OCCCO3)F
70761387	404.466	2.51	6.62	-18.66	2	6	79	0	6	COc1cccc(c1)N2C[C@@H](CC2=O)C(=O)NC[C@H](c3cccc4c3cccc4)O
48379331	407.293	2.81	5.49	-17.99	2	6	78	0	5	CN(CC(=O)NCc1[nH]c2ccccc2n1)C(=O)c3ccc(s3)Br
53191613	398.413	2.9	8.11	-20.05	2	6	78	0	6	c1ccc2c(c1)[nH]c(n2)CCCNC(=O)[C@H]3CCN(C3=O)c4ccc(c(c4)F)F
68394396	391.294	2.77	5.75	-9.2	2	5	71	0	6	c1ccc(cc1)CCc2nc(cs2)C(=O)NCc3c(cn[nH]3)Br
13944893	395.434	2.12	8.27	-15.75	2	6	74	0	6	COc1cccc(c1)NC(=O)[C@@H]2CC(=O)N(C2)CCc3c[nH]c4c3cc(cc4)F
40039167	391.393	2.63	7.41	-14.73	2	5	61	0	6	c1ccc2c(c1)CCN(C2)C(=O)CNc3cccc(c3)C(=O)NCC(F)(F)F
69927472	391.24	2.89	6.4	-14.45	3	4	72	0	5	c1cc(cc(c1)Br)[C@@H](C(=O)N)NC(=O)[C@H]2C[C@@H]2c3ccc(cc3)F
57169648	391.349	2.73	5.92	-13.88	2	6	76	0	6	COc1cc(ccc1O)CNC(=O)c2ccc(cc2)n3ccc(n3)C(F)(F)F
69185040	390.285	2.94	6.79	-13.54	3	6	79	0	6	c1cc(cc(c1)Br)C2(CCC2)NC(=O)NCCNc3ncccn3
94036532	398.528	2.84	7.19	-18.95	2	5	75	0	5	CS(=O)(=O)c1ccc(cc1)CCNC(=O)N[C@@H]2C[C@@H]3CCCc4c3c2ccc4
60473483	397.25	2.66	3.45	-11.49	2	6	77	0	5	c1cc2c(cc1C(=O)NCC(=O)NCc3c(ccs3)Br)OCO2
44035561	394.349	2.47	6.8	-19.02	2	6	77	0	6	c1ccc2c(c1)OC[C@@H](O2)C(=O)Nc3ccc(cc3)CC(=O)NCC(F)(F)F
66995175	390.358	2.56	3.9	-15.69	2	5	75	0	6	CNS(=O)(=O)c1ccc(c(c1)C(=O)NCc2cccc(c2)C(F)(F)F)F
27184887	392.484	2.33	7.95	-22.62	2	6	76	0	5	c1cnn(c1)c2ccc(cc2)CCNC(=O)c3ccc4c(c3)NC(=O)CCS4
66285427	399.191	2.98	6.73	-17.44	2	5	67	0	5	CC(=O)Nc1cc(c(cc1F)F)NC(=O)COc2cccc(c2)Br
94055884	393.487	2.78	6.07	-11.65	2	6	72	0	5	c1cc2c3c(c1)[C@H](C[C@H]3CCC2)NC(=O)NCc4ccnc(c4)O[C@@H]5CCOC5
72036986	413.493	2.6	7.99	-15.58	2	6	71	0	6	C[C@@H]1CN(C[C@H](O1)C)C(=O)c2ccc(cc2)CNC(=O)NCCc3ccccc3F
63714559	397.269	2.6	4.59	-17.86	2	6	77	0	6	c1c(cc(c2c1OCO2)Br)CNC(=O)CCNC(=O)C3CCCC3
64256781	397.168	2.84	6.86	-14.06	2	5	79	0	6	c1cc(cc(c1)I)OC(=O)COc2ccc(cc2)C(=O)N
71840087	419.275	2.29	5.37	-16.22	2	6	77	0	6	c1ccc(cc1)C(=O)NCCNC(=O)Cc2cc3c(cc2Br)OCCO3
77969650	418.522	2.47	9.31	-14.04	2	6	74	0	5	CN(Cc1ccccc1)C(=O)c2ccc(cc2)NC(=O)c3ccc4c(n3)NCCS4
66386726	397.809	1.39	4.24	-12.3	2	6	75	0	5	c1cc(c(cc1[C@@H](CNc2c(cc(cn2)C(=O)N3CCOCC3)Cl)O)F)F
14230873	405.248	3	5.64	-12.54	2	6	77	0	4	Cc1cc(ccc1NC(=O)CNC(=O)c2ccc3c(c2)OCCO3)Br
67561706	391.468	2.3	5.45	-16.62	2	6	79	0	6	CN(C)S(=O)(=O)c1ccc(cc1)CNC(=O)N[C@@H]2C[C@H]2c3cccc(c3)F
56528273	392.253	2.82	5.35	-17.87	3	6	79	0	6	CNC(=O)COc1ccc(cc1)CNC(=O)Nc2ccc(cc2)Br
90610617	392.249	2.76	4.07	-11.75	2	5	68	0	5	COc1ccc(c(c1)C(=O)NC[C@@H](c2ccc3c(c2)CCO3)O)Br
68089519	390.487	2.87	9.24	-17.66	2	6	80	0	5	Cc1cc(n(n1)c2ccc(cc2)CCNC(=O)c3cc4c([nH]c3=O)CCCC4)C
43948542	394.5	2.44	8.51	-18	2	6	76	0	5	Cc1nc2ccccc2n1CCCNC(=O)c3ccc4c(c3)NC(=O)[C@H](S4)C
66348362	398.482	2.88	8.7	-16.97	2	6	65	0	6	CN(C)C(=O)Cc1ccccc1NC(=O)NC[C@@H]2CCN(C2)c3ccc(cc3)F
58422234	390.281	2.77	7.6	-13.25	2	5	61	0	5	CC(=O)N(C)Cc1cccc(c1)NC(=O)NCc2cccc(c2)Br
17304638	405.248	2.52	5.39	-19.96	2	6	77	0	5	c1cc(ccc1C(=O)NCCC(=O)Nc2ccc3c(c2)OCCO3)Br
67174931	398.2	2.01	3.29	-10.35	2	5	71	0	6	c1cc(cnc1)C(=O)NC[C@@H](COc2ccc(cc2)I)O
63317473	396.512	2.4	7.56	-16.05	2	5	67	0	6	c1ccc2c(c1)C[C@@H](S2)C(=O)NCc3cccc(c3)C(=O)NC[C@@H]4CCCO4
32901155	419.403	2	7.41	-23.64	2	6	79	0	6	CC(=O)Nc1ccc(cc1)CNC(=O)[C@@H]2CC(=O)N(C2)c3cccc(c3)C(F)(F)F
68516919	398.413	1.99	7.35	-23.24	2	6	78	0	5	c1cc(cc(c1)C(=O)N2CCCC2)CNC(=O)c3ccc4c(c3)nc([nH]4)C(F)F
48300768	390.281	2.63	6.34	-13.55	2	5	71	0	6	CC[C@H](C)NC(=O)c1cccc(c1)CNC(=O)c2cc(cnc2)Br
55634740	390.361	2.69	8.35	-18.92	2	5	71	0	6	C[C@H](COc1ccccc1C(F)(F)F)NC(=O)c2c[nH]c3ccccc3c2=O
46603574	397.862	2.33	8.13	-30.73	2	6	79	0	5	c1cc(cc(c1)N2CCCC2=O)C(=O)Nc3ccc(c(c3)Cl)C(=O)NC4CC4
67628193	394.324	2.61	3.76	-17.29	2	6	79	0	5	CS(=O)(=O)N1CCC[C@@H](C1)NC(=O)NCCc2cccc(c2Cl)Cl
38755708	394.5	2.5	8.63	-13.64	2	6	80	0	5	c1ccc2c(c1)c(c[nH]2)CCNC(=O)C[C@@H]3CSc4n3c(=O)c5c(n4)CCC5
67810542	399.466	1.83	5.45	-16.39	2	6	71	0	6	C[C@@H]1CN(CCO1)Cc2cccc(c2)CNC(=O)c3cc(ccc3F)NC(=O)C
58687737	398.825	2.97	8.35	-21.79	2	6	76	0	5	c1ccc(c(c1)n2cc(cn2)C(=O)Nc3ccc(c(c3)Cl)C(=O)NC4CC4)F
58587537	392.282	2.04	7.3	-13.32	2	6	72	0	5	c1cc(ncc1CNC(=O)NCc2c(ccs2)Br)n3ccnc3
63314318	399.516	2.75	7.12	-14.87	2	6	71	0	5	c1cc(cc(c1)C(=O)NC[C@@H]2CCCO2)CNC(=O)N3CCc4c(ccs4)C3
67865043	396.31	2.16	4.94	-18.96	2	5	71	0	6	Cc1csc(n1)[C@@H](C)NC(=O)CCNC(=O)c2ccc(cc2)Br
63764359	395.278	2.86	4.31	-14.04	2	5	75	0	4	c1cc(cc(c1)Br)CNS(=O)(=O)c2ccc3c(c2)CCC(=O)N3
63796351	397.294	2.43	4.39	-17.94	2	5	75	0	6	c1ccc(cc1)S(=O)(=O)CCNC(=O)NCc2cccc(c2)Br
47188630	399.878	2.49	8.09	-13.67	2	6	79	0	6	C[C@H](Cc1cccc(c1)Cl)NC(=O)CCC(=O)N2CC(=O)Nc3c2cccc3
69253879	390.221	2.98	4.19	-9.3	2	5	60	0	6	c1cc(cc(c1)I)NC(=O)NCCOC[C@H]2CCOC2
43187249	393.291	2.61	7.35	-15.54	2	6	72	0	5	c1c(cc(cc1C(F)(F)F)NC(=O)NCc2nnc3n2CCC3)C(F)(F)F
63484297	391.519	2.58	4.61	-11.96	3	6	79	0	5	Cc1ccc(cc1C)[C@@H](CN2CCN(CC2)Cc3nc4ccccc4c(n3)N)O
47361565	393.896	2.13	5.16	-23.66	2	6	76	0	6	c1cc(cc(c1)OCC(=O)N2CCN(CC2)Cc3ccc(s3)Cl)C(=O)N
91710095	392.179	1.8	6.34	-13.67	2	6	72	0	5	Cn1cnc(n1)CNC(=O)NCc2ccc(cc2C(F)(F)F)Br
15030570	394.399	2.13	5.12	-14.93	2	6	77	0	6	COc1cc(ccc1OC(F)F)CNC(=O)c2ccc3c(c2)NC(=O)CS3
69792140	393.487	1.69	6.02	-20.6	2	6	76	0	6	c1cc(cc(c1)C(=O)N2CCN(CC2)CCOc3ccc4c(c3)CCC4)C(=O)N
67565773	391.468	2.25	6.68	-18.96	2	6	79	0	6	CN(C)S(=O)(=O)c1ccccc1CNC(=O)N[C@H]2C[C@@H]2c3cccc(c3)F
66675624	390.415	2.2	7.03	-25.31	2	6	78	0	5	Cc1nc(cs1)c2cc([nH]c2)C(=O)N(C)CC(=O)Nc3cc(cc(c3)F)F
69483481	394.471	2.87	7.52	-14.58	2	6	77	0	6	c1cc(c2c(c1)OCCO2)CNC(=O)c3ccc(cc3)CNC(=O)C4CCCC4
15182259	399.878	2.74	7.63	-16.84	2	6	79	0	5	c1ccc(cc1)NC(=O)C2CCN(CC2)C(=O)CNC(=O)c3ccc(cc3)Cl
67158008	399.535	2.23	8.16	-15.2	2	6	79	0	6	C[C@@H](C(C)C)NC(=O)C1CCN(CC1)C(=O)CNC(=O)c2ccc3c(c2)CCC3
56746435	399.466	2.95	7.86	-14.82	2	6	71	0	5	C[C@H]1CN(C[C@@H](O1)C)C(=O)c2ccc(cc2)NC(=O)NCCc3ccc(cc3)F
94119262	390.53	2.75	5.44	-16.37	2	5	75	0	6	c1cc2c3c(c1)[C@H](C[C@H]3CCC2)NC(=O)CCNS(=O)(=O)c4cccs4
63256786	395.503	2.49	7.79	-14.58	2	6	71	0	6	C[C@@H]1CN(C[C@@H](O1)C)C(=O)c2ccc(cc2)CNC(=O)NCCc3ccccc3
51482882	392.377	2.55	6.42	-18.26	2	5	70	0	6	c1cc(cc(c1)C(F)(F)F)CN2C[C@H](CC2=O)C(=O)Nc3cccc(c3)CO
41410265	399.925	2.94	4.7	-17.12	2	6	79	0	6	c1ccc2c(c1)CCN2S(=O)(=O)CCNC(=O)NCc3ccc(s3)Cl
67587486	393.213	2.9	4.61	-17.86	2	6	76	0	6	c1cc(cc(c1)Br)OCCNC(=O)Nc2nnc(s2)C(F)F
20135178	415.291	2.77	9.11	-16.88	2	6	74	0	4	CN(C)c1ccc(cc1)[C@@H]2CC(=O)NC(=N2)NC(=O)c3ccc(cc3)Br
67552462	397.381	2.61	6.79	-19.94	2	6	80	0	6	CC(=O)Nc1cc(ccc1F)C(=O)NCc2ccc(c(c2)F)Oc3cccnc3
70767953	399.303	2.87	6.38	-28.47	2	6	74	0	6	c1c(cc(cc1Cl)Cl)CCNC(=O)Cc2csc(n2)N3CCNC3=O
32102029	403.841	2.31	6.52	-14.98	2	6	79	0	6	c1ccc(c(c1)CNC(=O)CNC(=O)[C@@H]2CC(=O)N(C2)c3ccc(cc3)F)Cl
67175045	398.2	1.96	3.29	-10.66	2	5	71	0	6	c1cc(ccc1OC[C@H](CNC(=O)c2ccncc2)O)I
64437239	397.45	2.98	7.69	-23.06	2	6	79	0	5	CC(C)c1cccc(c1)N2C[C@@H](CC2=O)C(=O)Nc3ccc(c(c3)C(=O)NC)F
69970065	397.287	2.69	3.98	-12.8	2	6	80	0	5	Cn1cc(cn1)c2ncc(s2)C(=O)NC[C@H](c3ccc(cc3Cl)Cl)O
60337688	405.248	2.96	5.96	-16.15	2	6	77	0	5	c1cc(cc(c1)Br)C(=O)NCCNC(=O)c2cccc3c2OCCO3
12871680	419.201	2.98	5.56	-18.01	2	6	76	0	6	Cc1cc(ccc1NC(=O)CNC(=O)Cn2ccc(n2)C(F)(F)F)Br
66281870	393.459	2.24	8.84	-21.94	2	5	71	0	5	CC(=O)N[C@@H](CC(=O)Nc1nc2c(s1)CCCCC2)c3c(cccc3F)F
68078283	394.443	1.65	5.72	-11.97	2	5	70	0	6	c1cc(c(cc1F)F)[C@H](CNC(=O)CCC(=O)N2CCc3c(ccs3)C2)O
56765642	395.503	2.91	8.08	-16.34	2	6	71	0	6	CC1CCN(CC1)C(=O)c2ccc(cc2)NC(=O)NCc3ccc(cc3)COC
69075427	397.45	1.45	6.68	-18.14	2	6	71	0	4	c1cc(cc(c1)C(=O)N2CCCC2)CNC(=O)N[C@@H]3CCOc4c3cc(cc4)F
66158399	398.532	2.78	8.29	-22.05	2	6	74	0	6	c1cc(ccc1NC(=O)NCCCc2nc3c(s2)CCCC3)N4CCCC4=O
8294401	394.258	2.94	6.78	-18.77	2	6	79	0	6	CN(CC(=O)Nc1ccc(c(c1)Cl)Cl)C(=O)CNC(=O)c2ccccc2
58766786	395.278	2.8	6.03	-14.85	2	5	67	0	5	c1cc2c(cc1OCC(=O)NCc3c(ccs3)Br)CCC(=O)N2
94032638	392.503	2.15	8.42	-14.8	2	6	74	0	6	CN(CCc1ccccn1)C(=O)CNC(=O)N[C@H]2C[C@H]3CCCc4c3c2ccc4
55319642	397.45	1.75	8.05	-18.96	2	6	79	0	6	CC(=O)Nc1cccc2c1CCN(C2)C(=O)CCCNC(=O)c3ccc(cc3)F
67553835	390.487	2.98	6.07	-11.98	2	6	66	0	5	C[C@@H]1CN(CCO1)Cc2cccc(c2)CNC(=O)Nc3cc4ccccc4nc3
56724803	391.418	2.75	7.14	-15.12	3	6	79	0	6	Cc1ccc(c(c1NC(=O)C)C)NC(=O)N[C@H](C)COc2ccc(cc2F)F
55227596	394.5	1.8	7.18	-16.3	2	6	76	0	6	c1ccc(cc1)Cn2c3c(cn2)[C@@H](CCC3)NC(=O)CNC(=O)c4ccsc4
63160303	392.434	2.67	8.66	-15.81	2	6	74	0	6	CN(Cc1ccccn1)C(=O)Nc2ccc(cc2)C(=O)NCc3ccc(cc3)F
67933325	396.512	2.4	7.55	-15.51	2	5	67	0	6	c1ccc2c(c1)C[C@H](S2)C(=O)NCc3cccc(c3)C(=O)NC[C@@H]4CCCO4
77970421	409.511	2.68	8.58	-19.51	2	6	79	0	5	c1cc(ccc1CCC(=O)N2CCCC2)NC(=O)c3ccc4c(c3)SCC(=O)N4
69294315	399.466	2.46	5.45	-12.73	2	6	63	0	5	c1cc(ccc1CCN2CCOCC2)NC(=O)N[C@@H]3CCOc4c3cc(cc4)F
48852435	396.31	2.95	4.96	-12.67	3	5	70	0	6	CCNC(=O)c1ccc(cc1)CNC(=O)NCc2ccc(s2)Br
66286882	396.777	2.63	6.01	-17.6	2	6	77	0	4	CC(=O)Nc1cc(c(cc1F)F)NC(=O)Cc2cc3c(c(c2)Cl)OCCO3
31294906	390.386	1.63	4.47	-21.31	2	6	79	0	6	COc1ccc(cc1)N2C[C@H](CC2=O)C(=O)NC[C@H](c3ccc(c(c3)F)F)O
79309563	391.399	2.92	5.61	-15.85	2	6	80	0	6	Cc1cc(c(s1)C(=O)NCC(=O)Nc2cccc3c2nccc3)OC(F)F
66827388	394.443	2.27	5.22	-15.69	2	5	75	0	6	c1ccc2c(c1)CCC[C@H]2NC(=O)CNc3cccc(c3)S(=O)(=O)C(F)F
54031019	393.487	2.82	9.11	-21.28	2	6	79	0	6	c1ccc2cc(c(cc2c1)C(=O)NCCC(=O)N3CCCCC3)NC(=O)C4CC4
67174932	398.2	2.01	3.23	-10.43	2	5	71	0	6	c1cc(cnc1)C(=O)NC[C@H](COc2ccc(cc2)I)O
67594819	396.285	1.19	4.85	-14.3	2	6	79	0	5	CC(=O)NC[C@H]1CCCN(C1)C(=O)CNC(=O)c2cccc(c2)Br
69955682	390.896	2.19	6.8	-20.54	2	6	74	0	5	c1ccc(c(c1)N2CC[C@H](C2=O)NC(=O)NCc3csc(n3)C4CC4)Cl
66427245	393.266	2.78	5.55	-11.79	2	6	80	0	5	COc1ccc(cc1Br)C(=O)NCc2[nH]nc(n2)c3cccs3
91956051	399.466	2.64	9.31	-16.44	2	6	71	0	5	Cc1ccc(cc1NC(=O)C)NC(=O)N2CCC(CC2)OCc3ccccc3F
66402728	394.147	2.53	5.79	-16.09	2	6	78	0	4	CN(Cc1ccc(o1)Br)C(=O)Nc2cc(c[nH]c2=O)C(F)(F)F
63714250	397.25	2.35	3.3	-12.98	2	6	77	0	5	c1cscc1C(=O)NCC(=O)NCc2cc3c(c(c2)Br)OCO3
63788145	395.503	2.5	7.14	-18.12	3	6	79	0	6	CC1(CC[C@H](c2c1cccc2)NC(=O)NCc3ccc(cc3)OCC(=O)NC)C
65119226	390.892	2.79	6.05	-19.56	2	5	79	0	5	Cc1c([nH]c2c1cc(cc2)CNC(=O)CS(=O)(=O)c3ccc(cc3)Cl)C
58586843	396.31	2.62	5.01	-9.18	3	5	70	0	6	C[C@@H](C(=O)NCc1ccccc1)NC(=O)NCc2c(ccs2)Br
47622465	391.515	2.46	9.37	-13.47	2	5	61	0	4	c1ccc2c(c1)CCC[C@H]2NC(=O)NCc3cccc(c3)C(=O)N4CCCCC4
91743846	398.264	3	7.6	-18.59	2	6	75	0	4	Cc1cccc2c1[nH]cc2CCNC(=O)c3cnn4c3ncc(c4)Br
67434770	398.406	2.77	5.2	-17.19	2	5	75	0	6	CNC(=O)c1ccc(cc1)S(=O)(=O)N[C@@H]2C[C@H]2c3cccc(c3)C(F)(F)F
67175051	398.2	2.08	3.29	-10.26	2	5	71	0	6	c1ccnc(c1)C(=O)NC[C@H](COc2ccc(cc2)I)O
63939379	399.494	2.59	9.66	-22.58	2	5	67	0	5	CN(Cc1cccc(c1)C(=O)N)C(=O)c2ccc(cc2)N3CCc4ccccc4C3
70746844	397.168	2.86	6.87	-15.32	2	5	79	0	6	c1cc(ccc1C(=O)N)OC(=O)COc2ccc(cc2)I
66848901	399.466	2.55	6.42	-11.31	2	6	71	0	6	Cc1cccc(c1NC(=O)CNC(=O)CN2CCO[C@H](C2)c3cccc(c3)F)C
68354532	396.878	2.63	9.38	-18.04	2	6	76	0	6	Cc1nccn1Cc2ccc(cc2)NC(=O)[C@H](C)NC(=O)c3ccccc3Cl
14199288	393.528	2.64	7.08	-14.84	3	5	70	0	6	c1cc2c(cc1F)[C@H](CCS2)NC(=O)CCCNC(=O)NC3CCCCC3
93292606	395.503	2.78	9.12	-15.37	2	6	71	0	6	Cc1ccccc1COC2CCN(CC2)C(=O)NCc3cccc(c3)NC(=O)C
44178184	394.244	2.98	5.67	-14.27	3	5	70	0	5	CNC(=O)Cc1ccccc1NC(=O)NCc2cc(ccc2F)Br
12998669	407.392	2.27	5.95	-20.84	2	6	76	0	6	CN(Cc1ccc(cc1)C(F)(F)F)CC(=O)N2C[C@@H](Oc3c2cccc3)C(=O)N
31029489	393.487	2	7.51	-23.03	2	6	79	0	6	Cc1ccccc1C(=O)N2CCC(CC2)C(=O)NCCNC(=O)c3ccccc3
67175044	398.2	1.96	3.24	-10.77	2	5	71	0	6	c1cc(ccc1OC[C@@H](CNC(=O)c2ccncc2)O)I
63796434	390.281	2.77	5.97	-9.44	3	5	70	0	6	C[C@H](C(=O)NCc1ccccc1)NC(=O)NCc2cccc(c2)Br
63330474	397.306	2.86	6.66	-15.38	2	6	68	0	6	Cn1c2c(cn1)[C@@H](CCC2)NC(=O)NCCCOc3ccc(cc3Cl)Cl
4032866	390.361	2.99	0.21	-20.49	2	5	71	0	6	COc1ccc2cc(c(=O)[nH]c2c1)CCNC(=O)c3cccc(c3)C(F)(F)F
67335165	390.365	2.38	8.45	-21.88	2	6	80	0	4	Cc1cc(c2c(=O)[nH]n(c2n1)C)C(=O)N[C@H]3C[C@@H]3c4cccc(c4)C(F)(F)F
29258610	393.462	2.36	8.81	-19.62	3	5	74	0	6	Cc1c(c2cc(ccc2[nH]1)F)CC(=O)NCc3cccc(c3)NC(=O)C4CCC4
53298162	399.397	2.02	7.59	-21.08	2	6	79	0	5	c1cc(ccc1C(=O)NC2CC2)NC(=O)[C@@H]3CC(=O)N(C3)c4cc(cc(c4)F)F
12541018	393.266	2.49	6.32	-18.58	2	6	76	0	5	c1ccc(c(c1)NC(=O)CNC(=O)Cc2cn3ccsc3n2)Br
11097356	393.487	2.79	8.63	-16.96	2	6	79	0	6	C[C@H](c1ccccc1)NC(=O)c2ccc(cc2)NC(=O)[C@@H]3CC(=O)N(C3)C(C)C
66339733	390.867	2.66	4.17	-11.95	3	6	80	0	6	Cc1cccc(c1)OC[C@H](CNC(=O)N[C@@H]2CCOc3c2cccc3Cl)O
32795647	396.285	2.18	5.04	-17.62	2	6	79	0	6	CCCNC(=O)CNC(=O)[C@@H]1CC(=O)N(C1)c2ccc(c(c2)C)Br
14199287	393.528	2.64	7.12	-14.7	3	5	70	0	6	c1cc2c(cc1F)[C@@H](CCS2)NC(=O)CCCNC(=O)NC3CCCCC3
67465298	391.349	2.01	6.38	-13.09	2	6	79	0	5	c1cc(c(cc1N2CCCC2=O)NC(=O)CNC(=O)c3cc(cc(c3)F)F)F
92512630	399.466	2.53	8.18	-12.49	2	6	71	0	6	C[C@@H](C(=O)N1CCC(CC1)OCc2ccc(cc2)F)NC(=O)Nc3ccccc3
18837716	393.262	2.84	4.68	-12.49	2	5	75	0	5	C#CCNC(=O)c1cccc(c1)NS(=O)(=O)c2ccc(cc2)Br
72063590	390.237	2.29	3.28	-13.69	2	6	80	0	4	c1cc(ccc1Oc2ccc(cn2)C(=O)N[C@H]3CCC(=O)NC3)Br
68935805	392.908	2.58	5.88	-12.97	2	5	75	0	5	C[C@@H](C(=O)N[C@@H]1CCCc2c1cccc2)NS(=O)(=O)c3ccc(cc3)Cl
63980548	393.468	2.95	7.95	-21.27	2	6	80	0	5	c1cc2c(cc1NC(=O)COc3ccc4c(c3)CCC(=O)N4)sc(n2)C5CC5
69345432	397.497	2.87	5.32	-24.15	2	6	79	0	5	C[C@H](Cc1ccsc1)NC(=O)Nc2ccc(c(c2)N3CCCS3(=O)=O)F
92164998	393.896	1.96	5.03	-21.5	2	6	76	0	6	c1cc(ccc1OCC(=O)N2CCN(CC2)Cc3cc(cs3)C(=O)N)Cl
60416219	391.221	2.79	4.9	-10.4	2	6	77	0	4	c1cc(c2c(c1)OCCO2)NC(=O)CNC(=O)c3ccc(cc3)Br
63805450	391.449	2.93	4.98	-16.03	2	6	76	0	6	c1cc(ccc1OC[C@@H](CNC(=O)c2cc3c(s2)nc4n3ccs4)O)F
53154724	397.475	2.56	7.88	-22.62	2	5	71	0	6	Cc1nc(cs1)c2ccc(cc2)CCNC(=O)c3cc(ccc3F)NC(=O)C
46022795	399.878	2.57	7.78	-20.48	2	6	79	0	6	CNC(=O)c1ccc(c(c1)NC(=O)[C@@H]2CC(=O)N(C2)CCc3ccccc3)Cl
70873410	393.487	2.46	6.74	-14.97	2	6	80	0	5	CC1CCC(CC1)Oc2cc(ccn2)CNC(=O)[C@@H]3CC(=O)Nc4c3cccc4
31294391	392.377	2.12	6.16	-22.9	2	5	70	0	5	Cc1ccc(c(c1)F)N2C[C@H](CC2=O)C(=O)NC[C@H](c3ccc(c(c3)F)F)O
66472667	392.297	2.71	7.48	-13.41	2	5	63	0	6	CCn1cc(cc1C(=O)NCc2cccc(c2)C(=O)NC(C)C)Br
67646983	393.418	2.74	6.84	-13.59	2	6	72	0	5	c1ccc2c(c1)[C@@H](CCO2)NC(=O)NCc3ccc(c(c3)F)Oc4cccnc4
67038136	395.228	2.57	6.28	-16.35	2	5	67	0	6	COCC(=O)Nc1cccc(c1)CNC(=O)c2ccc(c(c2)F)Br
55880473	391.83	2.52	5.53	-17.73	2	6	71	0	5	c1cc(cc(c1)F)NC(=O)CNc2ccc(c(c2)Cl)C(=O)N3CCOCC3
67557559	395.503	2.83	9.05	-16.3	3	6	79	0	6	Cc1cccc(c1NC(=O)NCc2cccc(c2)NC(=O)[C@@H]3CCCO3)C(C)C
68289610	390.487	2.76	8.94	-18.77	2	6	80	0	5	Cc1cc(n(n1)Cc2cccc(c2)CNC(=O)c3cc4c([nH]c3=O)CCCC4)C
39420683	390.487	1.95	8.4	-19.9	2	6	78	0	6	Cc1c(c2ccccc2[nH]1)CCNC(=O)[C@H]3CCC(=O)N(C3)Cc4ccccn4
38715834	391.471	2.3	8.83	-25.4	2	6	79	0	6	Cc1ccc(cc1)N2C[C@H](CC2=O)C(=O)Nc3ccc(cc3)CC(=O)NC4CC4
65801150	399.535	2.94	8.26	-21.53	2	6	79	0	6	Cc1ccccc1C(=O)NCCC(=O)N2CCC(CC2)C(=O)NC3CCCCC3
66136801	392.569	2.64	7.14	-11.47	2	6	74	0	6	C[C@@H]1CCCCN1C(=O)[C@H](C)NC(=O)NCCCc2nc3c(s2)CCCC3
14964118	401.51	2.24	8.71	-15.35	2	5	65	0	6	CN(Cc1ccccc1)Cc2ccc(c(=O)[nH]2)C(=O)N[C@@H]3CCCc4c3cccc4
69083394	397.45	1.74	7.53	-17.1	2	6	71	0	4	c1cc(cc(c1)N2CCCCC2=O)CNC(=O)N[C@@H]3CCOc4c3cc(cc4)F
48117504	394.5	2.96	8.05	-19.3	2	6	74	0	6	Cc1csc(n1)CNC(=O)Nc2ccc(cc2)CC(=O)N(C)c3ccccc3
65568163	396.26	2.42	6.77	-16.42	2	5	75	0	6	Cc1c(c(=O)[nH]c(n1)C)CCC(=O)NCCc2cc(ccc2F)Br
56610454	392.503	2.65	9.42	-20.87	2	6	65	0	5	c1ccc(c(c1)CNC(=O)Nc2cccc(c2)C(=O)N3CCCC3)N4CCCC4
67937334	396.291	2.93	5.51	-20.59	2	5	75	0	4	c1cscc1c2nc(cs2)CC(=O)Nc3cc(c[nH]c3=O)Br
56102224	399.397	2.76	7.4	-16.75	2	6	79	0	6	C=CCNC(=O)c1ccc(cc1)NC(=O)[C@@H]2CCN(C2=O)c3cc(cc(c3)F)F
70788914	394.381	2.35	7.63	-17.97	2	6	76	0	5	Cn1cc(c(n1)c2ccc(cc2F)F)C(=O)NCC(=O)Nc3cccc(c3)C#C
55392636	399.516	2.22	7.75	-19.11	2	6	79	0	6	CCNC(=O)c1ccc(c(c1)NC(=O)CCC(=O)N2CCc3c(ccs3)C2)C
68314126	392.503	2.94	9.27	-17.67	2	6	65	0	5	CN1CCCc2c1ccc(c2)NC(=O)NCc3cccc(c3)CN4CCCC4=O
62411268	393.213	2.92	4.61	-18.34	2	6	76	0	6	c1cc(ccc1OCCNC(=O)Nc2nnc(s2)C(F)F)Br
67846015	390.487	2.5	6.46	-14.04	2	6	70	0	6	C[C@@H]1CN(CCO1)Cc2cccc(c2)CNC(=O)c3c[nH]nc3c4ccccc4
61557658	397.294	2.74	4.04	-18.52	2	5	75	0	6	CNS(=O)(=O)c1cccc(c1)C(=O)NCCc2ccccc2Br
72070474	417.238	2.91	7.56	-13.58	2	6	76	0	4	CC(=O)Nc1ccc(cc1NC(=O)c2ccn(n2)c3ccc(cc3)F)Br
55880444	391.83	2.55	5.53	-19.15	2	6	71	0	5	c1cc(ccc1NC(=O)CNc2ccc(c(c2)Cl)C(=O)N3CCOCC3)F
44636103	399.516	1.32	6.6	-20.04	2	6	79	0	6	CC(=O)NCC1CCN(CC1)C(=O)c2ccc(cc2)CNC(=O)c3cccs3
57995259	419.506	2.77	8.71	-30.35	2	6	79	0	6	c1ccc(cc1)CN2CC[C@H](C2=O)NC(=O)c3cccc(c3)NC(=O)c4cccs4
69079861	399.466	2.89	6.68	-15.5	3	6	79	0	6	CC[C@H](C)C(=O)Nc1cccc(c1)CNC(=O)N[C@@H]2CCOc3c2cc(cc3)F
69072170	397.45	1.63	7.43	-16.94	2	6	71	0	5	c1cc(ccc1CNC(=O)N[C@@H]2CCOc3c2cc(cc3)F)CN4CCCC4=O
57479956	390.48	2.55	5.19	-12.53	3	5	71	0	6	Cc1cccc(c1)OC[C@H](CNC(=O)N[C@H]2CCSc3c2cc(cc3)F)O
32905759	402.903	2.62	8.16	-19.53	2	5	67	0	4	c1cc2c(cc1OCC(=O)N[C@@H]3CCSc4c3cc(cc4)Cl)CCC(=O)N2
14166943	393.44	2.73	6.82	-15.69	2	5	71	0	5	CC(=O)NCc1ccc(s1)c2csc(n2)NC(=O)c3c(cccc3F)F
46724610	393.821	1.88	5.05	-14.42	2	5	67	0	4	c1cc(ccc1CN2CCN(CC2)C(=O)c3cc(c(cc3Cl)F)F)C(=O)N
62287803	396.462	2.85	9.21	-15.85	2	5	67	0	6	c1cc(cc(c1)NC(=O)[C@@H]2CCCO2)CNC(=O)C3(CCC3)c4ccc(cc4)F
14964122	401.51	2.24	8.69	-15.04	2	5	65	0	6	CN(Cc1ccccc1)Cc2ccc(c(=O)[nH]2)C(=O)N[C@H]3CCCc4c3cccc4
70833922	399.249	2.78	4.61	-13.76	3	5	78	0	6	C[C@H](C(=O)NC[C@H](c1cccc(c1)F)O)NC(=O)c2cccc(c2Cl)Cl
67732260	399.441	2.69	8.88	-17.43	2	5	61	0	4	c1ccc(c(c1)C(=O)N2CCC(CC2)NC(=O)N[C@H]3C[C@@H]3c4cccc(c4)F)F
65208055	390.358	2.82	4.08	-20.59	2	5	75	0	6	CS(=O)(=O)c1ccc(cc1)NC(=O)CNc2ccc(c(c2)C(F)(F)F)F
67553836	390.487	2.98	6.06	-11.76	2	6	66	0	5	C[C@H]1CN(CCO1)Cc2cccc(c2)CNC(=O)Nc3cc4ccccc4nc3
60776246	390.468	2.63	9.18	-25.26	2	6	76	0	6	c1ccc2c(c1)ncn2c3ccc(cc3)NC(=O)CCNC(=O)c4ccsc4
66386609	396.274	1.81	4.72	-9.68	2	6	75	0	5	c1cc(ccc1[C@H](CNc2c(cc(cn2)C(=O)N3CCOCC3)Cl)O)Cl
48367566	394.45	2.34	6.94	-29.34	2	6	78	0	5	c1ccc2c(c1)c(=O)nc([nH]2)CN3CCC(CC3)C(=O)NCc4ccc(cc4)F
48497817	408.285	2.94	6.24	-12.27	2	6	71	0	4	c1cc(ccc1C(=O)N2CCOCC2)NC(=O)NCc3ccc(cc3Cl)Cl
68431639	392.434	2.77	9.15	-15.34	2	6	76	0	6	Cn1cc(cn1)[C@H]2C[C@@H]2C(=O)Nc3ccc(c(c3)NC(=O)Cc4ccccc4)F
35939822	395.434	2.67	8.4	-12.25	2	6	74	0	6	CCOC(=O)c1c(c2cc(ccc2[nH]1)F)NC(=O)CN3CCc4ccccc4C3
63796388	397.294	2.2	4.15	-16.37	2	5	75	0	5	CS(=O)(=O)c1ccc(cc1)CNC(=O)NCc2cccc(c2)Br
67325334	391.468	2.86	6.83	-19.38	2	6	71	0	6	CCOc1ccc(cc1NC(=O)NCCC(=O)N2CCc3c(ccs3)C2)F
53250976	391.269	2.36	5.35	-9.84	2	6	66	0	4	c1ccnc(c1)CNC(=O)Nc2cc(ccc2N3CCOCC3)Br
66386730	397.809	1.39	4.28	-10.25	2	6	75	0	5	c1cc(c(cc1F)F)[C@@H](CNc2c(cc(cn2)C(=O)N3CCOCC3)Cl)O
38715837	395.434	2.02	8.24	-24.26	2	6	79	0	6	c1cc(ccc1CC(=O)NC2CC2)NC(=O)[C@H]3CC(=O)N(C3)c4ccc(cc4)F
69079858	399.466	2.89	6.69	-15.42	3	6	79	0	6	CC[C@@H](C)C(=O)Nc1cccc(c1)CNC(=O)N[C@@H]2CCOc3c2cc(cc3)F
69972815	394.294	2.17	5.02	-10.57	2	5	71	0	6	c1cc(cc(c1)Br)C(=O)NCC(=O)NCc2csc(n2)C3CC3
58612345	391.468	2.39	5.17	-15.44	2	6	79	0	4	CN1CCCc2c1ccc(c2)CNC(=O)Nc3cc(ccc3F)S(=O)(=O)C
77932308	395.509	2.75	7.48	-18.99	2	5	71	0	5	c1cc(cc(c1)NC(=O)c2cc3c(s2)SCC3)C(=O)NCc4cccnc4
66812779	399.232	2.64	5.02	-10.67	2	5	67	0	6	Cc1cc(nc(n1)C)NC[C@@H](COc2ccc(cc2)I)O
58628504	392.312	2.63	6.55	-15.65	2	6	76	0	5	c1ccc(c(c1)n2cc(cn2)C(=O)NCC(=O)Nc3ccc(c(c3F)F)F)F
67962263	391.519	2.58	4.6	-11.87	3	6	79	0	5	Cc1ccc(cc1C)[C@H](CN2CCN(CC2)Cc3nc4ccccc4c(n3)N)O
8600818	393.262	2.41	4.19	-15.63	2	5	79	0	4	c1cc(ccc1CNS(=O)(=O)c2ccc3c(c2)ccc(=O)[nH]3)Br
12978011	399.878	2.87	7.87	-14.74	2	6	79	0	6	Cc1c(cccc1Cl)NC(=O)CNC(=O)[C@@H]2CC(=O)N(C2)Cc3ccccc3
77928659	390.468	2.53	9.82	-24.13	2	6	76	0	6	c1cc(c2cncn2c1)C(=O)Nc3ccc(cc3)CC(=O)NCc4cccs4
57154613	395.793	2.54	6.58	-13.03	2	6	79	0	6	CN(CC(=O)Nc1ccccc1Cl)C(=O)CNC(=O)c2cc(cc(c2)F)F
94017851	391.537	2.34	5.91	-15.62	2	6	79	0	4	CCS(=O)(=O)N1CCC(CC1)NC(=O)N[C@@H]2C[C@@H]3CCCc4c3c2ccc4
67002840	394.66	2.89	7.35	-15.75	2	6	71	0	4	c1ccn2c(c1)nnc2CNC(=O)NCc3ccc(cc3Cl)Br
72321764	395.377	2.98	4.1	-16.9	3	5	79	0	5	COc1ccc(cc1)C(=O)N[C@@H]2[C@H](C[C@H]([C@H]2O)O)c3ccc(cc3)C(F)(F)F
54649272	393.871	2.93	6.11	-12.26	3	5	70	0	4	c1cc(ccc1NC(=O)CNC(=O)N[C@H]2CCSc3c2cc(cc3)F)Cl
69154424	399.285	1.82	3.47	-11.21	2	6	69	0	6	c1cc2c(cc1Br)[C@H](CCO2)NC(=O)NCCOC[C@H]3CCOC3
13351959	393.487	1.81	8.08	-27.93	2	6	79	0	6	CC(=O)Nc1ccc(cc1)C(=O)N2CCC(CC2)C(=O)NCCc3ccccc3
67243439	391.269	2.19	7.32	-19.49	2	6	76	0	6	CCNC(=O)Cn1ccc(n1)NC(=O)[C@H]2C[C@@H]2c3ccc(cc3)Br
66214995	418.291	2.52	5.71	-17.97	2	6	71	0	5	c1ccc(c(c1)NCC(=O)Nc2cccc(c2)C(=O)N3CCOCC3)Br
55880474	409.82	2.64	5.64	-14.64	2	6	71	0	5	c1cc(c(cc1NCC(=O)Nc2cc(ccc2F)F)Cl)C(=O)N3CCOCC3
38386664	391.365	1.89	3.78	-16.55	2	6	73	0	6	C[C@](CC(=O)N1CCN(CC1)CC(=O)Nc2ccc(cc2)F)(C(F)(F)F)O
30658744	391.258	2.76	6.95	-19.12	2	6	78	0	5	CN(Cc1[nH]c2ccccc2n1)C(=O)CNC(=O)c3ccc(cc3Cl)Cl
92317397	390.43	2.73	7.23	-11.88	2	5	62	0	6	c1ccc(c(c1)COC2CCN(CC2)C(=O)NCc3ccc(c(c3)CO)F)F
67174679	393.487	2.57	7.66	-14.14	2	6	79	0	5	Cc1ccc(cc1)C(=O)N2CCC(CC2)NC(=O)CNC(=O)c3ccccc3C
67611039	399.516	2.96	6.86	-14.48	2	6	79	0	6	CC(C)N(C)S(=O)(=O)c1ccc(cc1)CNC(=O)NCC#Cc2ccccc2
32096897	400.276	2.95	7.31	-22.47	2	5	63	0	5	Cn1cc(c2c1cccc2)C(=O)NCCNC(=O)c3cccc(c3)Br
69751790	391.237	2.85	3.37	-12.11	3	4	61	0	5	c1cc(c(cc1[C@@H](CNC(=O)NCc2c(ccs2)Br)O)F)F
32856068	392.912	2.17	6.56	-15.58	2	6	76	0	6	Cc1cc(n(n1)CCCNC(=O)C[C@@H]2C(=O)Nc3cc(ccc3S2)Cl)C
40087209	416.3	2.68	6.48	-14.91	2	5	71	0	5	c1cc(cc(c1)NC(=O)c2cccnc2)CNC(=O)c3cc(sc3)Br
44455178	390.484	2.16	4.52	-14.68	2	6	65	0	6	c1cc(sc1)C(=O)N2CCN(CC2)CCNC(=O)NCc3ccc(cc3)F
68885996	399.498	2.92	9.04	-14.7	2	6	72	0	6	Cc1c(c(n(n1)Cc2ccccc2)C)CNC(=O)NCc3cccc4c3nccc4
65159804	399.516	2.8	7.74	-14.84	2	6	79	0	5	Cc1ccc(s1)C(=O)NCC(=O)Nc2ccc(cc2)C(=O)N3CCCCCC3
91526607	394.519	2.41	8.97	-18.91	2	6	78	0	5	c1ccc2c(c1)[nH]c(n2)C3CCC(CC3)CNC(=O)[C@H]4CCC(=O)N(C4)C5CC5
7269475	393.44	2.75	7.02	-15.37	2	5	71	0	5	CC(=O)NCc1ccc(s1)c2csc(n2)NC(=O)c3ccc(cc3F)F
50051647	392.253	2.83	4.76	-15.06	3	6	79	0	5	CC(=O)Nc1cccc(c1)NC(=O)NCc2cc(ccc2OC)Br
44454299	392.912	2.98	4.8	-15.05	2	6	65	0	5	c1cc(sc1)C(=O)N2CCN(CC2)CCNC(=O)Nc3ccc(cc3)Cl
68354702	396.878	2.68	9.39	-16.1	2	6	76	0	6	Cc1nccn1Cc2ccc(cc2)NC(=O)[C@H](C)NC(=O)c3ccc(cc3)Cl
50637901	391.349	2.54	6.32	-15.03	2	6	79	0	5	c1cc(cc(c1)F)NC(=O)CNC(=O)[C@@H]2CCN(C2=O)c3cc(cc(c3)F)F
28329628	398.406	2.95	5.44	-17.46	2	5	75	0	6	c1cc(cc(c1)NC(=O)C2CCC2)CNS(=O)(=O)c3ccc(c(c3F)F)F
20715550	395.434	2.01	8.12	-17.63	2	6	74	0	5	COc1ccccc1NC(=O)CCC(=O)N2CCc3c(c4cc(ccc4[nH]3)F)C2
69059040	391.83	2.2	4.64	-14.9	3	6	79	0	5	c1cc(ccc1C(=O)NCCNC(=O)N[C@@H]2CCOc3c2cc(cc3)F)Cl
44454256	392.912	2.98	5.46	-15.91	2	6	65	0	5	c1cc(sc1)C(=O)NCCN2CCN(CC2)C(=O)Nc3ccc(cc3)Cl
17914135	407.804	2.56	7.11	-21.21	2	6	79	0	5	c1ccc(c(c1)N2C[C@H](CC2=O)C(=O)NCC(=O)Nc3ccc(c(c3)F)F)Cl
66429625	397.323	2.99	6.78	-11.14	2	5	71	0	6	c1cc(sc1)c2nc([nH]n2)CNC(=O)CCc3cc(cs3)Br
58307871	397.441	2.85	5.62	-16.43	2	5	67	0	5	c1cc(ccc1CN2CCN(CC2)C(=O)[C@@H]3CCCC[C@H]3C(F)(F)F)C(=O)N
48175253	390.386	1.58	5.04	-20.77	2	6	79	0	6	COc1ccccc1N2C[C@@H](CC2=O)C(=O)NC[C@@H](c3ccc(c(c3)F)F)O
12986875	416.275	2.43	6.73	-19.87	2	6	79	0	5	c1ccc(c(c1)C(=O)NCC(=O)Nc2ccc(cc2)N3CCCC3=O)Br
69104478	390.281	2.3	6.48	-13.96	2	5	61	0	5	CN(C)C(=O)c1ccc(cc1)CNC(=O)NCc2cccc(c2)Br
68843665	397.306	2.86	6.69	-15.41	2	6	68	0	6	Cn1c2c(cn1)[C@H](CCC2)NC(=O)NCCCOc3ccc(cc3Cl)Cl
56094489	397.381	2.13	7.44	-19.19	2	6	79	0	5	C#Cc1cccc(c1)NC(=O)CNC(=O)[C@H]2CCN(C2=O)c3cc(cc(c3)F)F
70450471	398.301	2.86	5.86	-9.72	2	6	71	0	6	CCCO[C@@H]1CCCN(C1)C(=O)CNC(=O)Nc2ccc(cc2)Br
48117644	394.5	2.96	8.04	-20.33	2	6	74	0	6	Cc1nc(cs1)CNC(=O)Nc2ccc(cc2)CC(=O)N(C)c3ccccc3
22586538	393.44	2.75	6.97	-16.83	2	5	71	0	5	CC(=O)NCc1ccc(s1)c2csc(n2)NC(=O)c3cc(ccc3F)F
68529684	396.516	2.44	6.7	-18.85	2	6	70	0	5	Cc1nc(cs1)c2cc([nH]c2)C(=O)N[C@@H](C)c3ccc(cc3)N4CCOCC4
47549545	394.5	2.27	7.59	-19.84	2	6	74	0	6	CN(C)C(=O)Cc1ccc(cc1)NC(=O)NCc2nc(cs2)c3ccccc3
67928621	395.503	2.48	7.94	-12.8	2	6	71	0	5	Cc1ccccc1CNC(=O)NCc2ccc(cc2)C(=O)N3C[C@H](O[C@@H](C3)C)C
69154422	399.285	1.82	3.45	-11.48	2	6	69	0	6	c1cc2c(cc1Br)[C@H](CCO2)NC(=O)NCCOC[C@@H]3CCOC3
67248210	391.265	2.96	5.46	-12.09	2	5	60	0	6	C[C@H](C(=O)NCc1ccccc1)NCc2cc3c(c(c2)Br)OCO3
68434524	392.282	2.59	7.16	-13.02	2	6	76	0	4	Cn1cc(cn1)[C@@H]2C[C@H]2C(=O)Nc3cc(n[nH]3)c4ccc(s4)Br
69211158	392.43	2.95	7.81	-14.43	2	5	67	0	5	c1ccc2c(c1)cccc2CC(=O)NCC(=O)N[C@@H]3CCOc4c3cc(cc4)F
67150486	395.503	2.94	9.12	-18.75	2	6	71	0	6	Cc1cc(c2c(c1)[C@@H](CCO2)NC(=O)CCNC(=O)N(C)Cc3ccccc3)C
66338355	391.269	2.4	5.66	-12.81	2	6	74	0	6	CN(Cc1ccccn1)C(=O)NCCNC(=O)c2ccc(cc2)Br
69284883	394.191	2.89	3.65	-9.78	3	5	70	0	5	c1cc2c(c(c1)Br)CC[C@H]2NC(=O)NCC(=O)NCC(F)(F)F
94091494	390.262	2.85	4.84	-12.55	2	5	75	0	4	c1cc(c(cc1Br)O)C(=O)NCc2nc(cs2)c3ccncc3
63094758	394.45	2.93	8.73	-18.63	2	6	78	0	4	CC(=O)N1CCC[C@H](C1)C(=O)Nc2ccc3c(c2)nc([nH]3)Cc4ccccc4F
47866471	390.487	2.54	8.62	-17.52	2	6	68	0	5	Cc1cc(n(n1)c2ccc(cc2)CCNC(=O)N[C@H]3CCOc4c3cccc4)C
92189548	397.494	2.6	7.23	-11.72	3	5	65	0	4	CC1(Cc2ccccc2C1)NC(=O)NCc3ccc(c(c3)F)N4CCC(CC4)O
69208513	390.434	2.82	5.78	-20.71	3	6	77	0	5	Cc1cc([nH]c(=O)c1CNC(=O)NC[C@H]2CCN(C2)c3ccc(c(c3)F)F)C
69934747	396.31	2.59	5.23	-11.28	2	5	63	0	6	COc1ccc(cc1Br)CNC(=O)NCc2csc(n2)C3CC3
47616838	393.896	2.87	5.38	-18.27	2	6	79	0	6	c1ccc2c(c1)CCN2S(=O)(=O)CCNC(=O)NCc3ccccc3Cl
52618668	406.917	2.89	8.28	-13.91	2	5	67	0	6	c1cc2c(nc1)[C@H](c3ccc(cc3CC2)Cl)NCCNC(=O)Cc4ccncc4
93903630	395.326	2.81	8.1	-13.77	2	5	74	0	5	Cn1c(nnc1S[C@H]2CCCc3c2cc(cc3)Br)CCC(=O)N
55880340	401.894	2.62	6.42	-15.61	2	6	71	0	6	Cc1ccccc1CNC(=O)CNc2ccc(c(c2)Cl)C(=O)N3CCOCC3
77952607	414.437	2.64	7.02	-23.46	2	6	76	0	5	c1cc(ccc1CNC(=O)c2cnn3c2SCC3)C(=O)Nc4ccc(c(c4)F)F
32747974	405.376	2.98	7.84	-31.83	2	6	79	0	6	c1cc(cc(c1)NC(=O)CN2CCCC2=O)C(=O)Nc3cccc(c3)C(F)(F)F
66472903	396.878	2.87	8.41	-17.89	2	6	76	0	6	CC(C)NC(=O)c1cccc(c1)CNC(=O)c2cnn(c2)c3ccccc3Cl
58418036	397.294	2.88	4.94	-19.27	2	5	75	0	4	Cc1ccc(cc1NC(=O)NCc2cccc(c2)Br)S(=O)(=O)C
42660971	399.878	2.26	7.37	-20.1	2	6	79	0	5	C[C@@H](C(=O)Nc1ccc(cc1)C(=O)N2CCCC2)NC(=O)c3ccccc3Cl
25052776	398.466	2.96	9.52	-13.49	2	6	76	0	5	Cc1ccc(n1c2ccc(cc2)C(=O)NCC(=O)Nc3cccc4c3nccc4)C
57928494	397.294	2.79	4.68	-16.19	2	5	75	0	6	CC(=O)Nc1ccc(cc1)S(=O)(=O)NCCc2ccccc2Br
68078000	394.805	2.72	6.03	-12.45	2	5	70	0	5	c1cc(ccc1N2CC[C@H](C2=O)C(=O)NC[C@@H](c3ccc(cc3F)F)O)Cl
67936902	393.237	2.59	5.56	-20.69	2	6	80	0	5	c1cc(ccc1C(=O)Nc2cc(c[nH]c2=O)Br)OC[C@@H]3CCCO3
94036403	391.515	2.91	9.5	-18.56	2	5	61	0	5	CN(C)C(=O)c1cccc(c1)CCNC(=O)N[C@H]2C[C@H]3CCCc4c3c2ccc4
47144658	395.431	2.82	5.16	-17.48	2	6	79	0	5	c1cc(ccc1CNC(=O)Nc2ccc(c(c2)F)F)S(=O)(=O)N3CCCC3
65467653	393.487	2.43	8.06	-11.14	2	6	71	0	4	Cc1c(cccc1NC(=O)NCc2ccc3c(c2)CCC3)C(=O)N4CCOCC4
47144774	395.431	2.82	5.18	-14.27	2	6	79	0	5	c1cc(ccc1CNC(=O)Nc2cc(cc(c2)F)F)S(=O)(=O)N3CCCC3
67988379	391.899	2.85	7.59	-20.04	2	6	79	0	6	c1cc(c(cc1NC(=O)CCN2CCCC2=O)C(=O)NC3CCCCC3)Cl
91924333	399.466	2.64	8.5	-15.32	2	6	71	0	6	CCNC(=O)c1cccc(c1)NC(=O)N2CCC(CC2)OCc3ccc(cc3)F
58586921	392.278	2.69	5.23	-13.36	3	5	70	0	5	C#Cc1cccc(c1)NC(=O)CNC(=O)NCc2c(ccs2)Br
58218209	393.487	2.65	8.48	-23.27	2	6	71	0	5	CN1CCCc2c1ccc(c2)CNC(=O)c3cccc(c3)NC(=O)[C@@H]4CCCO4
29864184	395.894	2.75	7.61	-16.27	2	6	75	0	4	c1ccc2c(c1)c(nc(n2)CN3CCN(CC3)C(=O)Cc4ccc(cc4)Cl)N
35534803	413.474	3	7.36	-12.96	2	6	80	0	6	c1ccc(c(c1)Cn2cccc2CNS(=O)(=O)c3ccc4c(c3)CCC(=O)N4)F
67175059	391.205	1.91	3.36	-12.12	2	5	68	0	6	c1cc(ccc1OC[C@H](CNC(=O)[C@@H]2CCCO2)O)I
68028027	399.535	2.94	8.22	-19.19	2	6	79	0	6	Cc1ccccc1C(=O)NCCC(=O)N2CCC[C@H](C2)C(=O)NC3CCCCC3
69463892	398.356	2.39	4.35	-12.91	3	5	71	0	5	c1cc(cc(c1)C(F)(F)F)[C@H](CNC(=O)N[C@H]2CCOc3c2cc(cc3)F)O
58136657	399.535	2.39	8.11	-13.51	2	6	79	0	6	C[C@@H](C(=O)NCc1cccc(c1)C(=O)N2CCCCC2)NC(=O)C3CCCCC3
70021342	390.358	2.93	4.66	-17.7	2	5	75	0	6	c1cc(ccc1NC(=O)NCCc2ccc(cc2F)F)S(=O)(=O)C(F)F
67645830	390.365	1.85	6.52	-15.65	3	6	79	0	6	c1cc(c(cc1CNC(=O)NC[C@@H](c2ccc(cc2F)F)O)F)n3ccnc3
69373740	393.487	2.77	8.3	-20.7	2	6	71	0	4	c1ccc(cc1)[C@@H]2CCCN2C(=O)c3ccc(cc3)NC(=O)N[C@@H]4CCCOC4
92187571	395.503	2.75	8.48	-18.63	2	6	71	0	6	Cc1ccccc1COC2CCN(CC2)C(=O)NCc3cccc(c3)C(=O)NC
13719805	405.498	2.84	8.52	-15.16	2	6	74	0	6	COc1ccc(cc1)CCNC(=O)[C@@H]2CCCN(C2)C(=O)c3ccc4cc[nH]c4c3
94016771	397.422	2.28	5.08	-13.96	2	5	63	0	6	c1cc(nc(c1)OCC(F)F)CNC(=O)N[C@@H]2CCSc3c2cc(cc3)F
69298658	394.45	2.66	6.38	-16.22	2	6	70	0	5	c1ccc(c(c1)[C@H]2C[C@@H]2C(=O)Nc3ccc4c(c3)nc([nH]4)CN5CCOCC5)F
44322491	397.45	3	8.34	-16.59	2	6	79	0	5	CC(C)c1cccc(c1)N2C[C@@H](CC2=O)C(=O)Nc3ccc(c(c3)NC(=O)C)F
67556945	393.365	2.72	6.31	-15.8	3	6	79	0	5	c1cc(cc(c1)NC(=O)[C@H]2CCCO2)CNC(=O)Nc3ccc(c(c3F)F)F
78413604	409.227	2.17	4.93	-12.64	2	5	71	0	5	Cc1cc(ccc1I)C(=O)NCCNC(=O)c2cccnc2
68127180	390.281	2.98	6.1	-20.45	2	5	71	0	6	CC(C)(c1cccc(c1)Br)C(=O)NCCC(=O)Nc2cccnc2
56145403	397.45	2.17	7.64	-18.27	2	6	71	0	5	C[C@@H](C(=O)N[C@H]1CCOc2c1cccc2)Nc3ccc(c(c3)N4CCCC4=O)F
64099106	390.237	2.25	3.32	-18.1	2	6	80	0	4	c1ccc(c(c1)Oc2ccc(cn2)C(=O)N[C@H]3CCCNC3=O)Br
66284610	391.349	1.72	6.95	-20.33	2	6	79	0	4	CC(=O)Nc1cc(c(cc1F)F)NC(=O)[C@@H]2CC(=O)N(C2)c3ccccc3F
66453399	392.253	2.15	5.88	-26.51	2	6	80	0	6	Cc1cccc(n1)NC(=O)CCNC(=O)c2ccc(c(c2)Br)OC
64859433	394.519	2.97	9.88	-20.14	2	6	74	0	6	Cc1cccc(n1)NC(=O)C2CCN(CC2)C(=O)CCNc3cc(cc(c3)C)C
20849736	402.248	2.7	8.03	-15.24	2	6	80	0	4	COc1ccc(cc1)[C@@H]2CC(=O)NC(=N2)NC(=O)c3cccc(c3)Br
39276864	406.486	2.9	9.97	-18.72	3	5	62	0	5	c1ccn(c1)[C@@H]2Nc3ccc(cc3S2)C(=O)NCCc4c[nH]c5c4cc(cc5)F
67565000	396.871	2.76	6	-17.04	2	5	75	0	6	c1cc(cc(c1)F)[C@H]2C[C@H]2NC(=O)NCCS(=O)(=O)c3ccc(cc3)Cl
69956455	390.553	2.74	7.46	-13.86	2	6	74	0	6	c1c(nc(s1)C2CC2)CNC(=O)N3CCC(CC3)NC(=O)CC4CCCC4
60417507	393.487	2.84	8.2	-16.83	2	6	79	0	5	Cc1cccc(c1)C(=O)NCC(=O)Nc2ccc(cc2)C(=O)N3CCC(CC3)C
64405370	396.285	2.02	5.16	-12.19	2	6	79	0	6	CC(C)CNC(=O)CNC(=O)[C@@H]1CC(=O)N(C1)c2cccc(c2)Br
41868843	393.262	2.73	4.71	-17.74	2	5	75	0	5	C#Cc1cccc(c1)NC(=O)CNS(=O)(=O)c2ccc(cc2)Br
12753156	401.413	2.31	7.2	-17.08	2	6	79	0	6	C[C@@H](c1ccc(c(c1)F)F)NC(=O)CNC(=O)c2ccc(cc2)N3CCCC3=O
30658783	401.264	2.24	6.55	-20.43	2	6	78	0	5	CN(Cc1[nH]c2ccccc2n1)C(=O)CNC(=O)c3ccccc3Br
14541811	393.466	1.87	6.56	-17.07	2	6	72	0	6	Cn1c2c(c(n1)C(=O)NCc3ccccc3F)C[C@@H](CC2)NCc4ccncc4
14741652	393.466	1.99	6.5	-15.79	2	6	72	0	6	Cn1c2c(c(n1)C(=O)NCc3ccccc3F)C[C@H](CC2)NCc4ccccn4
61228766	394.45	2.92	8.17	-24.35	2	6	78	0	5	Cc1ccc2c(c1)[nH]c(n2)[C@@H]3CCCN3C(=O)CCNC(=O)c4ccc(cc4)F
63733879	396.34	2.29	5.61	-15.14	2	5	70	0	5	c1cc(c(cc1[C@@H](CNC(=O)[C@H]2CCN(C2=O)c3ccc(c(c3)F)F)O)F)F
43772164	396.516	1.57	7.25	-21.65	2	6	78	0	6	Cc1nc(cs1)c2cc([nH]c2)C(=O)NCc3ccc(cc3)C(=O)N(C)C(C)C
57928976	395.378	1.84	0.59	-13.65	2	6	79	0	5	c1c2c(cc(c1S(=O)(=O)N[C@@H]3CCN(C3)CC(F)(F)F)F)NC(=O)CC2
12446166	398.482	2.59	8.77	-15.41	2	6	78	0	6	c1ccc(c(c1)CNC(=O)CC[C@@H]2CCCN(C2)C(=O)c3c4c([nH]n3)CCC4)F
66140808	392.569	2.59	7.16	-17.61	2	6	74	0	6	CC(C)C(=O)N1CCC(CC1)NC(=O)NCCCc2nc3c(s2)CCCC3
67807323	392.377	2.91	7.88	-18.88	2	5	67	0	6	c1ccc(c(c1)C(=O)NCc2cccc(c2)NC(=O)[C@@H]3CCCO3)C(F)(F)F
70872242	391.496	2.87	8.76	-16.05	2	5	71	0	6	C[C@H](c1ccc(cc1)NC(=O)c2ccncc2)NC(=O)c3c(ccs3)C4CC4
69208512	390.434	2.82	5.78	-20.13	3	6	77	0	5	Cc1cc([nH]c(=O)c1CNC(=O)NC[C@@H]2CCN(C2)c3ccc(c(c3)F)F)C
70829590	396.394	2.26	3.53	-15.15	2	6	80	0	6	Cn1cc(cn1)c2nc(cs2)C(=O)NC[C@H](c3ccccc3C(F)(F)F)O
67828165	390.386	2.97	7.91	-26.42	2	6	77	0	6	C[C@@H](C(=O)Nc1ccc(cc1)NC(=O)[C@H]2CCCO2)Oc3ccc(c(c3)F)F
67150424	391.471	2.22	8.68	-16.35	2	6	79	0	6	c1cc(cc(c1)NC(=O)CNC(=O)c2ccc3c(c2)CCC3)CN4CCCC4=O
43820041	391.468	2.64	5.18	-16.79	2	6	79	0	5	CS(=O)(=O)c1ccc(c(c1)NC(=O)NC[C@@H]2CCN(C2)c3ccccc3)F
13096334	392.908	2.47	5.39	-15.98	2	5	75	0	6	c1ccc2c(c1)CCC[C@H]2NC(=O)CCNS(=O)(=O)c3ccccc3Cl
67809436	393.487	1.66	5.49	-13.91	2	6	71	0	5	C[C@@H]1CN(CCO1)Cc2cccc(c2)CNC(=O)[C@@H]3CC(=O)Nc4c3cccc4
29863383	393.466	2.7	8	-15.66	2	6	75	0	5	c1ccc(c(c1)CCC(=O)N2CCN(CC2)Cc3nc4ccccc4c(n3)N)F
66750557	390.48	2.9	6.03	-18.07	2	5	75	0	6	C[C@@H](c1cccc(c1)S(=O)(=O)NC)NC(=O)C2(CCC2)c3cccc(c3)F
48105145	398.482	2.96	7.54	-17.47	2	6	65	0	5	CC(C)NC(=O)c1ccc(cc1)NC(=O)N2CCN(CC2)Cc3ccccc3F
29286223	399.878	2.45	8.1	-19.15	2	6	79	0	6	C[C@@H](C(=O)Nc1cccc(c1)CN2CCCC2=O)NC(=O)c3ccc(cc3)Cl
55351561	393.487	2.63	8.38	-15.82	2	6	79	0	6	Cc1cc(cc(c1)N2CC[C@@H](C2=O)C(=O)N[C@@H](C)C(=O)NCc3ccccc3)C
58731845	392.434	2.35	7.77	-19.21	2	6	74	0	6	CN(C)c1ccc(cc1F)CNC(=O)c2cccc(c2)NC(=O)c3cccnc3
58878696	398.301	2.86	5.87	-9.69	2	6	71	0	6	CCCO[C@H]1CCCN(C1)C(=O)CNC(=O)Nc2ccc(cc2)Br
32906524	391.471	2.19	7.9	-21.54	2	6	79	0	5	c1ccc2c(c1)C[C@H](C(=O)N2)CCC(=O)Nc3ccc(cc3)C(=O)N4CCCC4
94019981	397.422	2.26	5.05	-14.4	2	5	63	0	6	c1cc(nc(c1)OCC(F)F)CNC(=O)N[C@H]2CCSc3c2cccc3F
64992279	392.55	2.38	5.27	-15.39	2	6	74	0	6	CCc1c(sc(n1)NC(=O)CN2CCC(CC2)NC(=O)c3ccsc3)C
47882309	393.266	2.84	3.14	-10.42	2	6	80	0	4	Cc1nnc(o1)c2ccccc2NC(=O)NCc3cc(cs3)Br
68928860	393.459	2.95	6.69	-13.99	2	5	61	0	6	C[C@@H](C(=O)NC[C@@H]1CCN(C1)c2ccc(c(c2)F)F)NC(=O)c3cccs3
66677401	393.487	2	7.9	-14.8	2	6	79	0	5	Cc1ccc(cc1)C(=O)N2CCC(CC2)NC(=O)[C@@H](C)NC(=O)c3ccccc3
12911587	407.27	1.8	5.54	-24.43	2	6	80	0	6	c1cc(c(=O)n(c1)CC(=O)NCC(=O)Nc2ccc(c(c2F)F)F)C(F)(F)F
77261969	405.42	1.87	4.95	-10.93	3	5	70	0	5	Cn1cc(c2c1cccc2)CN[C@@H]3[C@H](C[C@H]([C@H]3O)O)c4ccc(nc4)C(F)(F)F
67912230	395.503	2.65	7.42	-15.25	3	6	79	0	6	Cc1cc(c(c(c1)C)NC(=O)NCc2cccc(c2)C(=O)NC[C@H]3CCCO3)C
72396157	393.487	2.61	5.38	-11.94	3	6	78	0	6	CCOc1ccc2c(c1)cc(c(=O)[nH]2)CNc3ccc(cc3)N4CCC[C@@H](C4)O
66439213	399.878	2.6	8.04	-29.26	2	6	79	0	6	Cc1ccc(c(c1)Cl)NC(=O)CCNC(=O)c2cccc(c2)N3CCCC3=O
56718326	391.418	2.95	4.64	-10.76	2	6	63	0	6	COc1c(cc(cc1F)NC(=O)NC[C@H]2CN(CCO2)Cc3ccccc3)F
65913023	394.258	3	7.17	-21.51	2	6	80	0	6	c1cc(c(cc1Cn2cc(ccc2=O)NC(=O)CNC(=O)C3CC3)Cl)Cl
94031951	391.537	2.34	5.73	-19.88	2	6	79	0	4	CS(=O)(=O)N1CCC(CC1)CNC(=O)N[C@H]2C[C@H]3CCCc4c3c2ccc4
40285172	394.45	2.96	8.68	-14.12	2	6	68	0	5	c1cc(ccc1N2CCN(CC2)C(=O)CCC(=O)Nc3ccc4c(c3)cc[nH]4)F
94119260	390.53	2.75	5.47	-16.43	2	5	75	0	6	c1cc2c3c(c1)[C@H](C[C@@H]3CCC2)NC(=O)CCNS(=O)(=O)c4cccs4
66812801	395.2	2.72	5.27	-10.12	2	5	78	0	6	c1cc(c(nc1)NC[C@H](COc2ccc(cc2)I)O)C#N
68394239	393.266	2.71	3.99	-10.46	2	6	80	0	6	c1cc(ccc1C(=O)NCc2c(cn[nH]2)Br)OCc3cscn3
66732229	397.45	2.37	7.73	-16.58	2	6	79	0	6	CC(C)NC(=O)c1cccc(c1)CNC(=O)[C@H]2CCN(C2=O)c3ccc(cc3)F
58959341	412.433	2.27	5.41	-13.05	2	5	74	0	5	Cc1csc(n1)[C@@](CC(=O)N2CCC(=CC2)c3ccc(cc3)O)(C(F)(F)F)O
56121514	393.434	2.51	6.67	-18.04	2	6	79	0	6	c1c(cc(cc1F)F)N2CC[C@@H](C2=O)C(=O)NCCC(=O)NC3CCCCC3
20135582	402.248	2.73	8.05	-17.11	2	6	80	0	4	COc1ccc(cc1)[C@@H]2CC(=O)NC(=N2)NC(=O)c3ccc(cc3)Br
69281187	391.516	2.37	4.64	-13.14	2	6	60	0	6	Cc1csc(n1)[C@@H](C)NC(=O)NCCN2CCN(CC2)c3ccc(cc3)F
66507943	390.896	2.5	7.16	-26.41	2	6	74	0	6	c1cc(ccc1C2(CC2)CNC(=O)Cc3csc(n3)N4CCNC4=O)Cl
68627696	394.269	2.8	7.02	-11.05	2	6	75	0	6	C[C@@H](C(=O)NCc1ccco1)NC(=O)N(C)Cc2ccccc2Br
58573297	399.445	2.46	9.44	-14.96	2	6	62	0	6	Cc1nccn1c2ccc(cc2F)CNC(=O)NCc3ccc(c(c3)F)N(C)C
66812798	395.2	2.72	5.32	-10.05	2	5	78	0	6	c1cc(c(nc1)NC[C@@H](COc2ccc(cc2)I)O)C#N
14742474	411.456	1.99	6.62	-15.38	2	6	72	0	6	Cn1c2c(c(n1)C(=O)NCc3ccncc3)C[C@H](CC2)NCc4cccc(c4F)F
66797856	390.237	2.9	7.77	-17.79	2	6	80	0	6	c1cc(cc(c1)Br)OCC(=O)Nc2ccc(nc2)NC(=O)C3CC3
93545169	397.45	3	8.82	-17.68	2	6	71	0	4	c1cc(cc(c1)NC(=O)[C@H]2CCCO2)CNC(=O)N3CCc4cc(ccc4C3)F
63796494	390.281	2.88	5.72	-14.83	3	5	70	0	6	CCNC(=O)c1cccc(c1)CNC(=O)NCc2cccc(c2)Br
9670800	419.275	3	5.88	-11.55	2	6	77	0	6	CC[C@H](c1ccc(cc1)Br)NC(=O)CNC(=O)c2ccc3c(c2)OCO3
68393717	397.66	2.4	5.19	-11.84	2	6	78	0	4	c1cc(ccc1N2CC[C@@H](C2=O)C(=O)NCc3c(cn[nH]3)Br)Cl
16085778	398.284	2.87	3.01	-12.58	2	5	75	0	5	c1cc(c(c(c1NC(=O)CNS(=O)(=O)c2ccc(c(c2F)F)F)F)F)F
14541810	393.466	1.87	6.57	-15.14	2	6	72	0	6	Cn1c2c(c(n1)C(=O)NCc3ccccc3F)C[C@H](CC2)NCc4ccncc4
35485486	393.487	2.44	6.61	-15.3	2	6	71	0	4	COc1cccc(c1)NC(=O)C2CCN(CC2)C(=O)[C@@H]3Cc4ccccc4CN3
66359438	399.491	2.02	7.17	-15.79	3	5	70	0	5	c1cc2c(c(c1)F)SCC[C@H]2NC(=O)NCc3ccc(cc3)C(=O)NC4CC4
67915741	396.516	2.82	8.71	-14.7	2	6	76	0	6	Cc1c(sc2c1c(ncn2)NCc3cccc(c3)C(=O)NC[C@H]4CCCO4)C
77892536	398.894	2.94	8.74	-14.61	2	6	76	0	6	Cc1c(nc2n1cc(cc2)Cl)C(=O)NCc3ccc(cc3)CC(=O)NC(C)C
69928522	391.24	2.86	6.4	-12.36	3	4	72	0	5	c1cc(cc(c1)F)[C@H]2C[C@@H]2C(=O)N[C@@H](c3cccc(c3)Br)C(=O)N
48367916	397.45	2.37	7.82	-16.45	2	6	79	0	6	CC(C)N1C[C@@H](CC1=O)C(=O)NCc2cccc(c2)NC(=O)c3ccc(cc3)F
68033246	391.265	2.64	6.4	-13.16	2	5	71	0	6	c1cc2c(c(c1)Br)CC[C@@H]2NC(=O)CCCNC(=O)c3ccco3
22491063	390.487	2.98	9.9	-24.33	2	6	78	0	6	Cc1cccc(c1C)N2C[C@H](CC2=O)C(=O)NCCCc3[nH]c4ccccc4n3
44107649	398.282	2.82	4.73	-15.78	3	6	79	0	6	COCC(=O)Nc1cccc(c1)NC(=O)NCc2ccc(s2)Br
44454277	392.912	2.67	5.47	-17.52	2	6	65	0	5	c1cc(ccc1NC(=O)N2CCN(CC2)CCNC(=O)c3ccsc3)Cl
6909509	392.842	3	9.7	-24.28	2	5	71	0	5	c1ccc2c(c1)c(=O)c3cc(ccc3[nH]2)OCC(=O)NCc4ccc(cc4)Cl
95350275	392.253	2.37	6.24	-21.85	2	6	74	0	4	COc1ccc(cc1N2CCCCC2=O)NC(=O)c3cc(c[nH]3)Br
58417358	392.253	2.83	4.79	-13.03	3	6	79	0	5	CC(=O)Nc1ccc(c(c1)NC(=O)NCc2cccc(c2)Br)OC
65306344	404.293	2.94	6.75	-13.95	2	6	80	0	5	Cc1c(sc(n1)Nc2ccc(cn2)Br)C(=O)NCc3ccccn3
67158778	396.516	2.67	7.76	-24.07	2	6	78	0	5	Cc1ccc2c(c1)[nH]c(n2)[C@@H]3CCCN(C3)C(=O)CCNC(=O)c4cccs4
66840593	391.537	2.26	6.57	-14	2	6	79	0	6	C[C@@H](C(=O)N1CCC(CC1)NC(=O)CC2CCCC2)NC(=O)c3cccs3
68710146	394.5	2.63	7.48	-16.93	2	6	74	0	5	C[C@H](c1ccc(cc1)N2CCCC2=O)NC(=O)NCc3nc4ccccc4s3
66812781	399.232	2.64	4.97	-10.78	2	5	67	0	6	Cc1cc(nc(n1)C)NC[C@H](COc2ccc(cc2)I)O
58568557	391.269	2.1	5.93	-17.59	2	6	74	0	6	CN(Cc1ccccn1)C(=O)CCNC(=O)Nc2ccc(cc2)Br
67590114	396.285	2.76	5.37	-13.18	2	6	71	0	5	c1cc(ccc1[C@H]2CN(CCO2)C(=O)NCCNC(=O)C3CC3)Br
48302462	391.855	2.62	5.94	-16.09	2	5	71	0	6	c1cc(cnc1)CNC(=O)CCNC(=O)c2c(c3ccc(cc3s2)F)Cl
90744543	398.278	2.61	2.73	-12.88	2	5	76	0	5	c1ccc(c(c1)S(=O)(=O)NC[C@H](c2ccc3c(c2)CCO3)O)Br
56765393	395.503	2.89	8.07	-16.2	2	6	71	0	6	CC1CCN(CC1)C(=O)c2ccc(cc2)NC(=O)NCc3cccc(c3)COC
44454298	392.912	2.95	4.79	-15.56	2	6	65	0	5	c1cc(cc(c1)Cl)NC(=O)NCCN2CCN(CC2)C(=O)c3cccs3
69344102	394.45	2.87	8.22	-17.7	2	6	68	0	4	Cc1cc(n(n1)Cc2cccc(c2)NC(=O)N[C@@H]3CCOc4c3cc(cc4)F)C
69463884	398.356	2.39	4.27	-12.95	3	5	71	0	5	c1cc(cc(c1)C(F)(F)F)[C@@H](CNC(=O)N[C@@H]2CCOc3c2cc(cc3)F)O
14746218	393.466	1.92	6.59	-13.35	2	6	72	0	6	Cn1c2c(c(n1)C(=O)NCc3ccc(cc3)F)C[C@H](CC2)NCc4ccncc4
60398255	393.487	2.93	8.17	-16.53	2	6	79	0	5	Cc1cccc(c1)C(=O)NCC(=O)Nc2ccc(cc2)C(=O)N3CCCC[C@H]3C
12739038	393.462	2.9	9.3	-14.39	2	5	65	0	5	c1ccc2c(c1)c(c[nH]2)CCNC(=O)[C@H]3CCCN(C3)C(=O)c4ccc(cc4)F
67157788	394.862	2.87	9.96	-15.44	2	6	76	0	5	c1cc2c(cc1C(=O)NCC(=O)Nc3ccc(c(c3)Cl)n4ccnc4)CCC2
67242077	398.204	1.94	5.76	-19.67	2	6	76	0	5	CCNC(=O)Cn1ccc(n1)NC(=O)c2cccc(c2)I
69457920	394.45	2.94	7.15	-11.84	3	6	79	0	5	CC[C@H](c1[nH]cc(n1)c2ccccc2)NC(=O)N[C@@H]3CCOc4c3cc(cc4)F
14540570	393.466	2.04	6.52	-13.5	2	6	72	0	6	Cn1c2c(c(n1)C(=O)NCc3ccc(cc3)F)C[C@@H](CC2)NCc4ccccn4
77892544	396.878	2.61	8.81	-14.47	2	6	76	0	6	Cc1c(nc2n1cc(cc2)Cl)C(=O)NCc3cccc(c3)CC(=O)NC4CC4
68909374	398.528	2.81	7.47	-20.46	2	5	75	0	6	C[S@](=O)c1ccc(cc1)C(=O)NCc2cccc(c2)NC(=O)C3CCCCC3
24810641	391.349	2.08	6.29	-16.23	2	6	79	0	4	CC(=O)N1CCc2c1ccc(c2)C(=O)NCC(=O)Nc3ccc(c(c3F)F)F
63162404	394.397	2.66	7.47	-18.15	2	6	68	0	4	Cc1cccc(c1)CN2CCN(CC2)C(=O)Nc3cc(c[nH]c3=O)C(F)(F)F
67158706	396.516	2.36	7.7	-26.5	2	6	78	0	5	Cc1ccc2c(c1)[nH]c(n2)[C@@H]3CCCN(C3)C(=O)CCNC(=O)c4ccsc4
69062685	397.45	2.31	6.66	-17.01	3	6	79	0	5	c1cc(cc(c1)NC(=O)C2CCC2)CNC(=O)N[C@H]3CCOc4c3cc(cc4)F
53506914	393.163	2.2	2.38	-10.49	2	6	80	0	6	Cc1c(c([nH]n1)C(=O)NCc2ccc(nc2)OCC(F)(F)F)Br
14741968	393.466	1.97	6.56	-14.45	2	6	72	0	6	Cn1c2c(c(n1)C(=O)NCc3ccc(cc3)F)C[C@@H](CC2)NCc4cccnc4
64099001	390.237	2.27	3.36	-17.13	2	6	80	0	4	c1cc(cc(c1)Br)Oc2ccc(cn2)C(=O)N[C@H]3CCCNC3=O
78929896	390.064	2.95	4.05	-8.96	2	4	62	0	4	c1cc(c(cc1Cl)Cl)[C@@H](CNC(=O)c2cc(cnc2)Br)O
72060709	391.269	1.89	5.42	-15.94	2	6	74	0	6	CN(C)c1cc(ccn1)C(=O)NCCNC(=O)c2cccc(c2)Br
19638957	400.482	2.41	5.82	-34.44	2	6	77	0	4	c1cc2ccc(c(c2nc1)O)CN3CC[NH+](CC3)Cc4ccc5cccnc5c4[O-]
63787221	398.232	2.92	5.5	-14.62	2	6	75	0	6	CN(Cc1cc(ccc1F)Br)C(=O)NCCNC(=O)c2ccco2
46313094	397.45	1.99	7.68	-26.18	2	6	79	0	5	CC(=O)N1CCC(CC1)C(=O)Nc2ccc(cc2)C(=O)NCc3ccccc3F
44038139	390.216	2.54	9.01	-15.76	2	6	72	0	4	c1cc(ccc1NC(=O)NCc2cc(ccc2F)Br)n3cncn3
94150674	392.228	2.81	4.85	-19.22	3	5	75	0	4	c1ccc(cc1)N2C[C@H](CC2=O)Nc3cc(cc(c3C(=O)N)F)Br
67992805	394.294	2.44	5.06	-13.88	2	5	71	0	6	CSc1ccc(cn1)C(=O)NCCNC(=O)c2cccc(c2)Br
77894374	396.878	2.76	7.61	-17.71	2	6	78	0	4	c1ccc(cc1)C(=O)N2CCC(CC2)NC(=O)Cc3c4cccc(c4[nH]n3)Cl
43488994	393.534	2.89	5.35	-13.3	2	6	79	0	5	C[C@H]1CCCN(C1)S(=O)(=O)c2ccc(cc2)NC(=O)NCc3ccsc3
66427898	393.266	2.78	5.51	-12.75	2	6	80	0	5	COc1ccc(c(c1)Br)C(=O)NCc2[nH]nc(n2)c3cccs3
47041374	394.294	2.8	7.35	-12.62	2	5	61	0	4	c1ccc(c(c1)NC(=O)NCc2cc(cs2)Br)N3CCCC3=O
70052349	390.358	3	4.54	-19.61	2	5	75	0	5	CS(=O)(=O)c1c(cc(cc1F)NC(=O)NCCc2ccc(cc2F)F)F
69967839	396.394	2.26	3.75	-13.73	2	6	80	0	6	Cn1cc(cn1)c2ncc(s2)C(=O)NC[C@@H](c3ccccc3C(F)(F)F)O
65906283	396.672	2.08	5.09	-18.63	2	5	71	0	6	c1cc(cnc1)CNC(=O)CCNC(=O)c2ccc(cc2Cl)Br
32913538	406.103	2.78	5.56	-11.02	2	5	67	0	5	c1cnc(nc1)NCCNC(=O)c2cc(c(s2)Br)Br
65364604	404.312	2.51	7.82	-15.72	2	6	70	0	6	Cc1nc(cc(n1)N2CCCC2)NCCNC(=O)c3ccccc3Br
58157533	393.163	2.14	2.4	-10.62	2	6	80	0	6	Cc1c(c([nH]n1)C(=O)NCc2ccnc(c2)OCC(F)(F)F)Br
70046318	390.415	2.92	5.29	-17.42	2	6	76	0	6	c1cc2c(ccc(c2nc1)OC(F)F)NC(=O)NCc3csc(n3)C4CC4
67581255	395.931	2.96	4.29	-12.44	2	6	65	0	6	c1cc(ccc1[C@@H](C2CCN(CC2)C(=O)NCCCN3CCOCC3)O)Cl
67809440	393.487	1.66	5.48	-13.65	2	6	71	0	5	C[C@H]1CN(CCO1)Cc2cccc(c2)CNC(=O)[C@@H]3CC(=O)Nc4c3cccc4
63266447	396.516	2.82	8.68	-14.55	2	6	76	0	6	Cc1c(sc2c1c(ncn2)NCc3cccc(c3)C(=O)NC[C@@H]4CCCO4)C
68393417	393.266	2.68	3.98	-11.58	2	6	80	0	6	c1cc(cc(c1)OCc2cscn2)C(=O)NCc3c(cn[nH]3)Br
66346928	398.482	2.96	9.24	-17.6	2	6	65	0	6	CC(=O)N(C)Cc1ccccc1NC(=O)NC[C@H]2CCN(C2)c3ccc(cc3)F
77928676	396.516	2.34	9.54	-21.58	2	6	76	0	6	c1cc(c2cncn2c1)C(=O)NCC3CCC(CC3)C(=O)NCc4cccs4
60562445	393.274	2.69	7.5	-20.74	2	6	74	0	6	CN(CC(=O)Nc1ccc(c(c1)Cl)Cl)C(=O)c2ccc(nc2)NC3CC3
55110786	395.228	2.93	5.56	-14.44	2	5	67	0	6	CC(=O)NCCNC(=O)c1ccc(c(c1)F)Oc2ccc(cc2)Br
66622146	392.793	2.71	5.09	-11.66	2	6	80	0	5	Cc1c(nnn1c2ccc(c(c2)Cl)F)C(=O)NC[C@@H](c3cccc(c3)F)O
69160799	390.468	2.71	9.59	-29.89	2	6	80	0	6	c1cc(sc1)c2ccc(c(=O)[nH]2)C(=O)NCCc3ccc(cc3)n4cccn4
70044972	398.532	2.47	8.05	-13.72	2	6	74	0	5	c1cc(ccc1C(=O)N2CCCCCC2)NC(=O)NCc3csc(n3)C4CC4
44036803	407.297	2.67	7.07	-17.34	2	5	70	0	4	c1cc(ccc1CC(=O)N2CCC(CC2)O)NC(=O)c3ccc(c(c3)Cl)Cl
38739735	393.44	2.63	6.61	-18.96	2	5	71	0	6	c1cc(c(c(c1)F)CNC(=O)Cc2csc(n2)NC(=O)c3ccsc3)F
67552271	391.402	2.45	6.88	-16.52	2	6	80	0	5	c1ccc2c(c1)[C@H](CC(=O)N2)C(=O)NCc3ccc(c(c3)F)Oc4cccnc4
4109534	411.255	2.79	9.4	-12.75	2	5	71	0	4	c1ccn(c1)c2ccc(cc2)C(=O)C[C@]3(c4cc(ccc4NC3=O)Br)O
12920567	399.497	2.13	6.59	-17.27	2	6	80	0	5	c1ccc2c(c1)[C@@H](CCO2)NC(=O)Cc3csc(n3)NC(=O)c4cccs4
13124156	412.387	2.96	6.51	-13.13	2	6	68	0	5	c1cc(ccc1[C@H]2C[C@H](n3c(cc(n3)C(=O)NC[C@@H]4CCCO4)N2)C(F)(F)F)F
61461198	394.45	2.72	8.19	-17.54	2	6	78	0	5	Cc1ccc2c(c1)[nH]c(n2)[C@@H]3CCCN3C(=O)CNC(=O)Cc4cccc(c4)F
66439060	391.899	2.54	7.48	-22.87	2	6	79	0	6	Cc1ccc(c(c1)Cl)NC(=O)CCNC(=O)[C@H]2CCCN(C2)C(=O)C3CC3
68394787	396.248	2.72	8.2	-13.04	2	6	76	0	4	c1ccc2c(c1)ncn2c3ccc(cc3)C(=O)NCc4c(cn[nH]4)Br
63315194	393.487	2.88	7.98	-15.68	2	6	71	0	5	c1ccc2c(c1)CCN(C2)C(=O)NCc3cccc(c3)C(=O)NC[C@@H]4CCCO4
64868966	391.88	2.43	5.44	-19.74	2	6	80	0	6	CNS(=O)(=O)c1cccc(c1)CNC(=O)Cn2ccc3c2cc(cc3)Cl
56718324	391.418	2.95	4.59	-11.08	2	6	63	0	6	COc1c(cc(cc1F)NC(=O)NC[C@@H]2CN(CCO2)Cc3ccccc3)F
72396158	393.487	2.61	5.39	-12.07	3	6	78	0	6	CCOc1ccc2c(c1)cc(c(=O)[nH]2)CNc3ccc(cc3)N4CCC[C@H](C4)O
70837994	398.228	2.86	3.7	-12.26	2	5	68	0	6	COc1cc(cc(c1Br)OC)C(=O)NC[C@@H](c2cccc(c2)F)O
15883016	395.846	2.98	8.67	-18.09	2	6	80	0	5	CC(=O)Nc1ccc(cc1)NC(=O)c2ccc(=O)n(c2)Cc3ccc(cc3)Cl
67242915	391.269	2.14	7.19	-21.12	2	6	76	0	6	CCNC(=O)Cn1ccc(n1)NC(=O)[C@H]2C[C@@H]2c3ccccc3Br
14746219	393.466	1.92	6.58	-15.08	2	6	72	0	6	Cn1c2c(c(n1)C(=O)NCc3ccc(cc3)F)C[C@@H](CC2)NCc4ccncc4
13629839	391.515	2.11	8.51	-12.22	3	5	70	0	4	C[C@@H](C(=O)N[C@@H]1CCCc2c1cccc2)NC(=O)N[C@@H]3CCCc4c3cccc4
12930376	406.28	2.99	5.99	-12.18	2	6	71	0	6	CN(Cc1ccccc1Br)C(=O)CNC(=O)Nc2cccc(c2)OC
67949921	393.278	2.17	3.27	-14.71	2	5	80	0	5	c1cc(c(cc1Br)F)CS(=O)(=O)N2CCC(CC2)CC(=O)N
46658035	394.5	1.27	6.88	-24.55	2	6	78	0	5	Cc1nc(cs1)c2cc([nH]c2)C(=O)NCc3cccc(c3)C(=O)N4CCCC4
47345455	397.475	2.62	8.53	-23.05	2	5	65	0	5	c1cc2c(cc1F)[nH]cc2C3=CCN(CC3)C(=O)CCNC(=O)c4ccsc4
46637430	391.265	2.89	5.67	-13.67	2	5	67	0	6	CCNC(=O)c1ccc(cc1)CNC(=O)c2cc(ccc2Br)OC
61581424	398.429	1.81	3.08	-16.21	3	6	79	0	6	c1cc(ccc1C(=O)N[C@@H]2CCN(C2)CC(F)(F)F)N3CCC[C@@H](C3)C(=O)N
55800315	398.2	2.75	5.72	-11.14	2	5	71	0	4	Cc1cc(c(o1)C)C(=O)NCC(=O)Nc2cccc(c2)I
32924612	402.623	2.72	4.3	-11.89	2	5	67	0	5	c1cc(c(cc1C(=O)NCCNc2cnccn2)I)Cl
67336461	398.406	2.75	5.22	-19.19	2	5	75	0	6	CNS(=O)(=O)c1cccc(c1)C(=O)N[C@@H]2C[C@H]2c3cccc(c3)C(F)(F)F
54098861	397.381	1.67	7.26	-17.47	2	6	79	0	5	C#Cc1cccc(c1)NC(=O)CNC(=O)[C@@H]2CC(=O)N(C2)c3cc(cc(c3)F)F
53605037	393.516	1.77	3.32	-14.85	2	6	75	0	6	c1ccnc(c1)CN2CCN(CC2)Cc3csc(n3)c4ccc(cc4)C(=O)N
72063589	390.237	2.29	3.27	-13.71	2	6	80	0	4	c1cc(ccc1Oc2ccc(cn2)C(=O)N[C@@H]3CCC(=O)NC3)Br
66921750	392.297	2.01	4.7	-13.62	2	5	61	0	6	C#CCN1CCC(CC1)C(=O)NCCNC(=O)c2ccc(cc2)Br
56145402	397.45	2.17	7.64	-18.68	2	6	71	0	5	C[C@H](C(=O)N[C@@H]1CCOc2c1cccc2)Nc3ccc(c(c3)N4CCCC4=O)F
21599015	401.513	2.93	6.82	-16.69	2	6	80	0	6	Cc1ccc(cc1OC)C(=O)Nc2nc(cs2)c3ccc(s3)CNC(=O)C
66890855	393.487	2.88	7.89	-18.05	2	6	78	0	6	CCc1cccc2c1[nH]cc2C(=O)CN3CCC(CC3)NC(=O)c4ccoc4C
31737351	405.248	2.89	5.85	-18.68	2	6	77	0	5	C[C@H](c1ccc2c(c1)NC(=O)CO2)NC(=O)COc3ccc(cc3)Br
33087558	397.5	2.79	8.08	-15.51	2	6	76	0	6	CC[C@@H](c1ccc2c(c1)OCCCO2)NC(=O)CSc3[nH]c4ccccc4n3
32901154	419.403	2	7.4	-20.7	2	6	79	0	6	CC(=O)Nc1ccc(cc1)CNC(=O)[C@H]2CC(=O)N(C2)c3cccc(c3)C(F)(F)F
32795353	396.31	2.98	4.82	-20.69	3	5	70	0	6	CNC(=O)c1ccc(cc1)CNC(=O)NCCc2ccc(s2)Br
67107147	394.443	2.81	5.36	-18.63	2	5	75	0	6	CC(C)NS(=O)(=O)c1cc(ccc1F)C(=O)N[C@H]2C[C@@H]2c3cccc(c3)F
26565413	392.908	2.5	5.86	-14.5	2	5	75	0	6	c1ccc2c(c1)CCC[C@@H]2NC(=O)CCNS(=O)(=O)c3cccc(c3)Cl
56649042	396.466	2.76	9.86	-19.36	2	6	65	0	5	c1ccc(c(c1)CNC(=O)Nc2ccc(c(c2)N3CCCC3=O)F)N4CCCC4
68078064	396.34	2.29	5.66	-14.06	2	5	70	0	5	c1cc(c(cc1N2CC[C@@H](C2=O)C(=O)NC[C@@H](c3ccc(cc3F)F)O)F)F
67605418	398.301	2.92	5.48	-12.86	2	6	71	0	6	CCO[C@@H]1CCCN(C1)C(=O)NCCNC(=O)c2ccc(cc2)Br
71983336	399.466	2.43	7.08	-14.49	2	6	71	0	6	C[C@@H]1CN(C[C@H](O1)C)C(=O)CNc2ccc(cc2)C(=O)NCc3ccccc3F
45583296	407.239	3	6.81	-19.55	2	5	75	0	6	CC(=O)c1ccc(cc1)NC(=O)CCNC(=O)c2cc(ccc2Br)F
43133047	392.253	2.74	5.62	-16.06	3	6	79	0	6	COCC(=O)Nc1cccc(c1)CNC(=O)Nc2ccccc2Br
94017852	391.537	2.34	5.94	-15.28	2	6	79	0	4	CCS(=O)(=O)N1CCC(CC1)NC(=O)N[C@H]2C[C@@H]3CCCc4c3c2ccc4
14740348	393.466	1.93	6.54	-16.33	2	6	72	0	6	Cn1c2c(c(n1)C(=O)NCc3ccccc3F)C[C@@H](CC2)NCc4cccnc4
68167404	394.805	2.24	6.2	-21	2	5	67	0	5	c1cc(c(cc1F)Cl)C(=O)NCCC(=O)N[C@@H]2CCOc3c2cc(cc3)F
68841877	390.487	2.1	6.96	-11	2	6	66	0	6	c1ccc(c(c1)CNC(=O)NCc2cccc3c2nccc3)CN4CCOCC4
78929972	409.269	2.7	5.18	-12.94	2	6	79	0	6	c1ccc2c(c1)N(C(=O)CO2)CCC(=O)NC[C@@H](c3ccc(cc3Cl)Cl)O
65809971	392.253	2.54	6.19	-15.24	2	6	75	0	4	c1cc(cc(c1)NC(=O)N2CCCC2)CNC(=O)c3cc(oc3)Br
77860844	390.468	2.84	9.98	-18.66	2	6	76	0	6	c1cc2cc(ncn2c1)C(=O)Nc3ccc(cc3)CC(=O)NCc4cccs4
53574113	399.875	2.34	6.18	-12.34	2	6	75	0	6	COC(=O)c1c(nc(s1)NCc2ccc(c(c2)F)N3CCC(CC3)O)Cl
7269629	393.44	2.75	6.98	-12.16	2	5	71	0	5	CC(=O)NCc1ccc(s1)c2csc(n2)NC(=O)c3cc(cc(c3)F)F
56145401	397.45	2.17	7.64	-18.19	2	6	71	0	5	C[C@@H](C(=O)N[C@@H]1CCOc2c1cccc2)Nc3ccc(c(c3)N4CCCC4=O)F
71948950	413.291	2.28	5.16	-8.99	2	6	65	0	4	C[C@@H](C(=O)NC1CC1)N2CCN(CC2)C(=O)Nc3ccc(cc3Br)F
67931293	399.516	2.75	7.15	-14.5	2	6	71	0	5	c1cc(cc(c1)C(=O)NC[C@H]2CCCO2)CNC(=O)N3CCc4c(ccs4)C3
56726433	394.5	2.22	7.85	-16.21	2	6	74	0	6	CN(C)C(=O)Cc1ccccc1NC(=O)NCc2nc(cs2)c3ccccc3
13944802	409.461	2.52	9.07	-18.6	2	6	74	0	6	Cc1ccc(c(c1)NC(=O)[C@H]2CC(=O)N(C2)CCc3c[nH]c4c3cc(cc4)F)OC
4052905	403.269	2.75	8.09	-17.02	2	6	76	0	5	c1cc(c(c(c1)Cl)Cn2cccc(c2=O)NC(=O)NCc3ccncc3)Cl
94058975	391.468	2.89	6.16	-14.23	2	6	71	0	5	COc1cc(cc(c1)F)CNC(=O)N2CCC(CC2)NC(=O)c3ccsc3
92512632	399.466	2.53	8.29	-12.28	2	6	71	0	6	C[C@H](C(=O)N1CCC(CC1)OCc2ccc(cc2)F)NC(=O)Nc3ccccc3
65914811	391.537	2.39	6.68	-12.16	2	6	79	0	5	Cc1ccc(s1)C(=O)NCC(=O)N2CCC[C@@H](C2)C(=O)NC3CCCCC3
19742661	412.541	2.86	9.86	-11.46	2	6	70	0	6	Cc1cccc(n1)CNc2c3ccc(nc3[nH]n2)[C@H]4CCCN(C4)Cc5ccccc5
90749479	412.536	2.86	7.12	-14.04	2	5	70	0	6	c1ccc(cc1)N2C[C@@H](CC2=O)C(=O)NCc3ccc(s3)[C@@H](c4cccs4)O
47473247	398.413	2.9	7.61	-12.67	2	6	76	0	6	Cc1c(cnn1c2ccc(cc2)F)[C@@H](C)NC(=O)CNC(=O)c3ccc(cc3)F
61019354	390.281	2.88	5.53	-16.73	3	5	70	0	6	CNC(=O)c1cccc(c1)CNC(=O)NCCc2ccccc2Br
66823384	397.313	2.56	6.2	-11.92	2	5	67	0	6	C[C@@H](Cc1ccc(cc1)Br)NC(=O)[C@@H](C)NC(=O)C2CCOCC2
25060187	415.419	2.4	6.71	-14.54	2	6	75	0	4	c1ccc2c(c1)c(nc(n2)CN3CCN(CC3)C(=O)c4ccc(cc4)C(F)(F)F)N
58586923	396.31	2.73	4.76	-14.74	3	5	70	0	6	CCNC(=O)c1cccc(c1)CNC(=O)NCc2c(ccs2)Br
24917997	393.462	2.77	9.21	-20.5	3	5	74	0	6	Cc1c(c2cc(ccc2[nH]1)F)CC(=O)N[C@@H](C)c3ccc(cc3)NC(=O)C4CC4
94154347	395.2	2.53	4.14	-10.73	2	5	78	0	6	c1cc(ccc1OC[C@H](CNc2cnccc2C#N)O)I
67972649	395.89	2.77	8.87	-18.89	2	5	65	0	5	c1cc(cc(c1)C(=O)N2CCCC2)CNC(=O)Cc3c[nH]c4c3ccc(c4)Cl
58748498	395.434	1.96	6.88	-20.23	2	6	79	0	4	c1cc(ccc1CC(=O)N2CCC[C@@H](C2)C(=O)Nc3ccc4c(c3)C(=O)NC4)F
44036849	417.303	2.17	6.74	-16.36	2	5	70	0	4	c1cc(cc(c1)Br)C(=O)Nc2ccc(cc2)CC(=O)N3CCC(CC3)O
69926777	391.29	2.56	5.83	-15.31	3	4	72	0	4	c1ccc2c(c1)C[C@H](S2)C(=O)N[C@H](c3cccc(c3)Br)C(=O)N
72356298	391.471	2.2	6.57	-16.42	2	6	79	0	4	c1cc(cc(c1)C(=O)N2CCNC(=O)C2)c3ccc(cc3)C[C@@H]4CCCNC4=O
94071506	397.313	2.78	5.83	-18.85	2	5	67	0	6	C[C@@H]1CC(C[C@@H](O1)C)C(=O)NCCCNC(=O)c2cccc(c2)Br
67055641	391.468	1.63	5.25	-13.97	2	6	71	0	6	CC(=O)NCc1ccc(s1)C(=O)NCc2ccc(c(c2)F)N3CCOCC3
63795777	392.484	2.35	9.17	-26.42	2	6	74	0	4	Cc1c(sc(n1)NC(=O)c2ccc(cc2)CN3CNc4ccccc4C3=O)C
47959856	391.471	2.79	8.29	-14.55	2	6	75	0	4	C[C@H](c1cccc2c1cccc2)NC(=O)NC3CCN(CC3)C(=O)c4ccoc4
69336059	390.237	2.27	3.4	-16.81	2	6	80	0	4	c1cc(cc(c1)Br)Oc2ccc(cn2)C(=O)N[C@@H]3CCCNC3=O
58056024	392.503	2.85	9.36	-14.75	2	6	65	0	6	c1cc(cc(c1)NC(=O)NCc2ccc(cc2)N3CCCC3)CN4CCCC4=O
94154346	395.2	2.53	4.09	-10.85	2	5	78	0	6	c1cc(ccc1OC[C@@H](CNc2cnccc2C#N)O)I
68115654	393.462	2.79	7.69	-16.05	2	5	61	0	6	C#CCN1CCC(CC1)C(=O)NCc2cccc(c2)NC(=O)c3cccc(c3)F
13944871	395.434	2.1	8.4	-14.56	2	6	74	0	6	COc1ccccc1NC(=O)[C@@H]2CC(=O)N(C2)CCc3c[nH]c4c3cc(cc4)F
66928339	392.471	1.61	5.05	-11.8	2	6	79	0	5	C[C@H](C(=O)N1CCC(CC1)[C@@H](c2ccc(cc2)F)O)NC(=O)C3CCOCC3
57776310	393.534	2.76	5.16	-16.17	2	6	79	0	6	c1ccc(cc1)S(=O)(=O)N2CCC(CC2)CNC(=O)NCc3cccs3
68420629	398.413	2.58	8.91	-16.2	2	6	78	0	6	c1ccc(cc1)[C@H](CN2CCCC2=O)NC(=O)c3ccc4c(c3)nc([nH]4)C(F)F
34899924	411.477	2.21	7.63	-21.06	2	6	79	0	6	Cc1ccc(cc1)C(=O)N2CCC(CC2)C(=O)NCCNC(=O)c3ccc(cc3)F
70836125	394.855	2.33	4.47	-11.98	3	5	78	0	5	c1cc(cc(c1)F)[C@@H](CNC(=O)C[C@@H]2C(=O)Nc3cc(ccc3S2)Cl)O
78445255	399.163	2.4	4.38	-11.13	2	5	71	0	4	c1cc(cnc1)NC(=O)CNC(=O)c2ccc(c(c2)F)I
44454320	392.912	2.17	4.84	-16.55	2	6	65	0	5	c1cc(cc(c1)Cl)NC(=O)NCCN2CCN(CC2)C(=O)c3ccsc3
14740347	393.466	1.93	6.55	-15.19	2	6	72	0	6	Cn1c2c(c(n1)C(=O)NCc3ccccc3F)C[C@H](CC2)NCc4cccnc4
65135915	412.287	2.82	7.13	-12.45	2	5	71	0	4	Cc1ccc2c(cc(cc2n1)NC(=O)C)C(=O)NCc3ccc(cc3)Br
60321303	415.284	2.88	4.01	-15.73	2	5	75	0	6	CCNC(=O)c1ccc(cc1)CNS(=O)(=O)c2cc(ccc2F)Br
66455511	396.672	2.08	5.1	-16.73	2	5	71	0	6	c1cc(cnc1)CNC(=O)CCNC(=O)c2cc(ccc2Cl)Br
66439305	399.878	2.69	7.94	-20.46	2	6	79	0	5	Cc1ccc(c(c1)Cl)NC(=O)CCNC(=O)c2ccc3c(c2)CCN3C(=O)C
65992355	399.878	2.69	7.57	-16.55	2	6	79	0	6	C[C@H](c1cccc(c1)N2CCCC2=O)NC(=O)CNC(=O)c3cccc(c3)Cl
23294767	401.413	1.91	6.62	-38.33	2	6	79	0	4	CNC(=O)c1cccc(c1)NC(=O)C2CCN(CC2)C(=O)c3ccc(cc3F)F
71775780	404.514	2.58	9.03	-14.23	2	6	78	0	6	CCc1c(c2cc(cc(c2[nH]1)CNC(=O)[C@H]3CC(=O)N(C3)Cc4cccnc4)C)C
50426791	395.862	1.77	6.32	-21.62	2	6	79	0	6	c1cc(c(cc1F)Cl)C(=O)NCCC(=O)N2CCC[C@H](C2)C(=O)NC3CC3
70044985	398.532	2.3	7.64	-12.81	2	6	74	0	5	C[C@@H]1CCCCN1C(=O)c2ccc(cc2)NC(=O)NCc3csc(n3)C4CC4
67928952	395.503	2.51	7.67	-12.9	2	6	71	0	5	Cc1cccc(c1)CNC(=O)NCc2ccc(cc2)C(=O)N3C[C@H](O[C@H](C3)C)C
[truncated: 9,628 more rows]
